# Supplementary material for: Inhibition of G-protein signalling in cardiac dysfunction of intellectual developmental disorder with cardiac arrhythmia (IDDCA) syndrome
Source: PubMed Central journal article supplement (PMC8639930; doi:10.1136/jmedgenet-2020-107015), 2020-11-10
Supplement: jmedgenet-2020-107015supp004.pdf [file jmedgenet-2020-107015supp004.pdf]

Table S1. Detailed clinical features of individuals with IDDCA and LADCI syndromes

|                                     |  | Lodder E., De Nittis P., Koopman C. et al., 2016 |                                              |                                                 |                                  |                                  |                                                 |                            |                            |                            |       |
|-------------------------------------|--|--------------------------------------------------|----------------------------------------------|-------------------------------------------------|----------------------------------|----------------------------------|-------------------------------------------------|----------------------------|----------------------------|----------------------------|-------|
|                                     |  | Family A                                         |                                              | Family B                                        | Family C                         |                                  | Family D                                        | Family E                   |                            | Family F                   |       |
| Individual                          |  | 1                                                | 2                                            | 3                                               | 4                                | 5                                | 6                                               | 7                          | 8                          | 9                          |       |
| Gender, Age (years)                 |  | F, 22                                            |                                              | F, 20                                           | F, 6                             | F, 11                            | M, 9                                            | F, 12                      | F, 13                      | M, 8                       | M, 23 |
| Nucleotide change (NM_006578.3)     |  | c.249G>A,r.249_250 ins249+1_249+25/ c.994C>T     | c.249G>A,r.249_250 ins249+1_249+25/ c.994C>T | c.249+1G>T/ c.249+1G>T                          | c.249+3G>T/ c.249+3G>T           | c.249+3G>T/ c.249+3G>T           | c.906C>G/ c.906C>G                              | c.242C>T/ c.242C>T         | c.242C>T/ c.242C>T         | c.242C>T/ c.242C>T         |       |
| Amino acid change (NP_006569.1)     |  | p.Asp84Valfs*52/ p.(Arg332*)                     | p.Asp84Valfs*52/ p.(Arg332*)                 | p.Asp84Leufs*31/ p.Asp84Leufs*31                | p.Asp84Valfs*31/ p.Asp84Valfs*31 | p.Asp84Valfs*31/ p.Asp84Valfs*31 | p.Tyr302*/ p.Tyr302*                            | p.(Ser81Leu)/ p.(Ser81Leu) | p.(Ser81Leu)/ p.(Ser81Leu) | p.(Ser81Leu)/ p.(Ser81Leu) |       |
| Birth weight                        |  | 3580 g (50th percentile)                         | NA                                           | NA                                              | 2751 g (15 th percentile)        | NA                               | 2845 g (15th percentile)                        | NA                         | NA                         | NA                         |       |
| Ethnicity                           |  | Italy                                            | Italy                                        | Jordan                                          | Puerto Rico                      | Puerto Rico                      | India                                           | Morocco                    | Morocco                    | Brazil                     |       |
| Consanguinity                       |  | -                                                | -                                            | +                                               | +                                | +                                | -                                               | -                          | -                          | +                          |       |
| Altered speech development          |  | +                                                | +                                            | NR                                              | +                                | +                                | +                                               | +                          | +                          | NA                         |       |
| - Verbal understanding              |  | NA                                               | NA                                           | nonverbal                                       | unremarkable                     | unremarkable                     | NA                                              | NA                         | NA                         | NA                         |       |
| - Lexical production                |  | NA                                               | NA                                           | nonverbal                                       | delayed                          | delayed                          | nonverbal                                       | delayed                    | delayed                    | NA                         |       |
| Intellectual disability (ID)        |  | +                                                | +                                            | +                                               | +                                | +                                | +                                               | mild                       | mild                       | mild                       |       |
| Epilepsy                            |  | +                                                | +                                            | +                                               | -                                | -                                | +                                               | -                          | -                          | -                          |       |
| Sinus Sick Syndrome (SSS)           |  | +                                                | +                                            | +                                               | +                                | +                                | increased PR interval (intermittent Weckenbach) | +                          | +                          | +                          |       |
| - Minimum heart rate                |  | 24                                               | 39                                           | NA                                              | paced                            | paced                            | NA                                              | 20                         | 16                         | NA                         |       |
| - Maximum heart rate                |  | 163                                              | 192                                          | NA                                              | paced (27% heartbeats on Holter) | paced (20% heartbeats on Holter) | NA                                              | 176                        | 180                        | NA                         |       |
| - Chronotropic response             |  | NA                                               | NA                                           | NA                                              | +                                | +                                | NA                                              | unremarkable               | unremarkable               | NA                         |       |
| - Escape beats                      |  | +                                                | +                                            | NA                                              | paced                            | paced                            | NA                                              | +                          | +                          | NA                         |       |
| Pacemaker implantation              |  | -                                                | -                                            | -                                               | +                                | +                                | -                                               | -                          | +                          | NA                         |       |
| Heart structural abnormalities      |  | -                                                | PFO                                          | NA                                              | -                                | -                                | -                                               | -                          | -                          | NA                         |       |
| Hypotonia                           |  | +                                                | +                                            | +                                               | +                                | +                                | +                                               | -                          | impaired fine motor skills | -                          |       |
| Pathological gastric reflux         |  | +                                                | +                                            | NA                                              | +                                | +                                | +                                               | -                          | -                          | NA                         |       |
| Nystagmus                           |  | +                                                | +                                            | +                                               | +                                | +                                | +                                               | NA                         | -                          | NA                         |       |
| Retinal Disease                     |  | +                                                | NA                                           | NA                                              | NA                               | NA                               | +                                               | NA                         | NA                         | NA                         |       |
| Metabolic work-up:                  |  |                                                  |                                              |                                                 |                                  |                                  |                                                 |                            |                            |                            |       |
| - Plasma amino acids chromatography |  | 938 µm/l (restored)                              | +                                            | NA                                              | unremarkable                     | unremarkable                     | unremarkable                                    | 444 µm/l                   | unremarkable               | NA                         |       |
| - Urine organic acids               |  | unremarkable                                     | unremarkable                                 | increased excretion of 3-methyl-glutaconic acid | unremarkable                     | unremarkable                     | unremarkable                                    | NA                         | NA                         | NA                         |       |
| Others                              |  | -                                                | -                                            | -                                               | -                                | -                                | -                                               | -                          | -                          | -                          |       |
| Dysmorphic feature(s)               |  | -                                                | -                                            | -                                               | -                                | -                                | -                                               | -                          | -                          | -                          |       |
| Family history                      |  | -                                                | -                                            | -                                               | -                                | -                                | -                                               | -                          | -                          | -                          |       |

|                                 |  | Shamseldin et al., 2016                  |                              |                            |                            |                            | Turkdogan D. et al., 2016            |                                    |                                   |                                   |                                                   |                                   |
|---------------------------------|--|------------------------------------------|------------------------------|----------------------------|----------------------------|----------------------------|--------------------------------------|------------------------------------|-----------------------------------|-----------------------------------|---------------------------------------------------|-----------------------------------|
|                                 |  | Family G                                 |                              |                            |                            |                            | Family H                             |                                    |                                   |                                   |                                                   |                                   |
| Individual                      |  | 10                                       | 11                           | 12                         | 13                         | 14                         | 15                                   | 16                                 | 17                                | 18                                | 19                                                | 20                                |
| Gender, Age (years)             |  | F, 10                                    | F, 9                         | F, 3                       | F, 5                       | F, 9                       | M, 2 (second degree cousin of pt 16) | F, 10 - pair of a monozygotic twin | F (deceased 5.5months)            | M (deceased 7months)              | F - pair of a monozygotic twin (deceased 8months) | M (deceased 7yo)                  |
| Nucleotide change (NM_006578.3) |  | c.242C>T/ c.242C>T                       | c.242C>T/ c.242C>T           | c.242C>T/ c.242C>T         | c.242C>T/ c.242C>T         | c.242C>T/ c.242C>T         | c.355delG/ c.355delG                 | c.355delG/ c.355delG               | c.355delG/ c.355delG              | c.355delG/ c.355delG              | c.355delG/ c.355delG                              | c.355delG/ c.355delG              |
| Amino acid change (NP_006569.1) |  | p.(Ser81Leu)/ p.(Ser81Leu)               | p.(Ser81Leu)/ p.(Ser81Leu)   | p.(Ser81Leu)/ p.(Ser81Leu) | p.(Ser81Leu)/ p.(Ser81Leu) | p.(Ser81Leu)/ p.(Ser81Leu) | p.Ala119Profs16/ p.Ala119Profs16*    | p.Ala119Profs16/ p.Ala119Profs16*  | p.Ala119Profs16/ p.Ala119Profs16* | p.Ala119Profs16/ p.Ala119Profs16* | p.Ala119Profs16/ p.Ala119Profs16*                 | p.Ala119Profs16/ p.Ala119Profs16* |
| Birth weight                    |  | 50th centile                             | 50th centile                 | NA                         | 50th centile               | NA                         | NA                                   | 1800 g (<1st)                      | NA                                | NA                                | NA                                                | NA                                |
| Ethnicity                       |  | Saudi                                    | Saudi                        | Saudi                      | Saudi                      | Saudi                      | Turkish                              | Turkish                            | Turkish                           | Turkish                           | Turkish                                           | Turkish                           |
| Consanguinity                   |  | +                                        | +                            | +                          | -                          | -                          | +                                    | +                                  | +                                 | +                                 | +                                                 | +                                 |
| Altered speech development      |  | +                                        | +                            | +                          | -                          | -                          | +                                    | +                                  | NA                                | NA                                | NA                                                | NA                                |
| - Verbal understanding          |  | +                                        | +                            | +                          | +                          | +                          | no developmental milestones          | no developmental milestones        | NA                                | NA                                | NA                                                | NA                                |
| - Lexical production            |  | delayed                                  | delayed                      | delayed                    | delayed                    | delayed                    | no developmental milestones          | no developmental milestones        | NA                                | NA                                | NA                                                | NA                                |
| Intellectual disability (ID)    |  | normal IQ, but school performance issues | normal cognitive development | NA                         | normal IQ                  | NA                         | +                                    | +                                  | +                                 | +                                 | +                                                 | +                                 |
| Epilepsy                        |  | NA                                       | NA                           | NA                         | NA                         | NA                         | +                                    | +                                  | NA                                | +                                 | +                                                 | NA                                |
| Sinus Sick Syndrome (SSS)       |  | NA                                       | NA                           | NA                         | NA                         | NA                         | +                                    | +                                  | NA                                | NA                                | NA                                                | +                                 |
| - Minimum heart rate            |  | NA                                       | NA                           | NA                         | NA                         | NA                         | NA                                   | NA                                 | NA                                | NA                                | NA                                                | NA                                |
| - Maximum heart rate            |  | NA                                       | NA                           | NA                         | NA                         | NA                         | NA                                   | NA                                 | NA                                | NA                                | NA                                                | NA                                |
| - Chronotropic response         |  | NA                                       | NA                           | NA                         | NA                         | NA                         | NA                                   | NA                                 | NA                                | NA                                | NA                                                | NA                                |
| - Escape beats                  |  | NA                                       | NA                           | NA                         | NA                         | NA                         | NA                                   | NA                                 | NA                                | NA                                | NA                                                | NA                                |

|                                                         |                            |                       |    |             |                        |                                       |                                                          |    |    |    |    |
|---------------------------------------------------------|----------------------------|-----------------------|----|-------------|------------------------|---------------------------------------|----------------------------------------------------------|----|----|----|----|
| Pacemaker implantation                                  | NA                         | NA                    | NA | NA          | NA                     | - (suggested, but refused by parents) | - (suggested, but refused by parents)                    | NA | NA | NA | NA |
| Heart structural abnormalities                          | NA                         | NA                    | NA | NA          | NA                     | -                                     | -                                                        | NA | NA | NA | NA |
| Hypotonia                                               | -                          | -                     | NA | +           | NA                     | +                                     | +                                                        | NA | NA | NA | NA |
| Pathological gastric reflux                             | NA                         | NA                    | NA | NA          | NA                     | NA                                    | NA                                                       | NA | NA | NA | NA |
| Nystagmus                                               | NA                         | NA                    | NA | NA          | NA                     | +                                     | +                                                        | NA | NA | NA | NA |
| Retinal Disease                                         | NA                         | NA                    | NA | NA          | NA                     | +                                     | +                                                        | NA | NA | NA | NA |
| Metabolic work-up<br>-Plasma amino acids chromatography | NA                         | NA                    | NA | NA          | NA                     | NA                                    | unremarkable                                             | NA | NA | NA | NA |
| -Urine organic acids                                    | NA                         | NA                    | NA | NA          | NA                     | NA                                    | unremarkable                                             | NA | NA | NA | NA |
| Others                                                  | ADHD, marked hyperactivity | inattentive type ADHD | -  | motor delay | ADHD, mild motor delay | -                                     | autistic (midline hand automatisms, lack of eye contact) | NA | NA | NA | NA |
| Dysmorphic feature(s)                                   | -                          | -                     | -  | -           | -                      | -                                     | prominent forehead, acquired micro-brachycephaly         | NA | NA | NA | NA |
| Family history                                          | -                          | -                     | -  | -           | -                      | -                                     | -                                                        | NA | NA | NA | NA |

|                                                          | Vernon H. et al., 2017        | Malerba N. et al., 2018                                   | Poke G. et al., 2019                           |                               |                   |                   |                     |                       | Tang M. et al., 2020                                   | Yadzani S. et al., 2020                                 | Sciaccia F.L. et al., 2020                       |
|----------------------------------------------------------|-------------------------------|-----------------------------------------------------------|------------------------------------------------|-------------------------------|-------------------|-------------------|---------------------|-----------------------|--------------------------------------------------------|---------------------------------------------------------|--------------------------------------------------|
|                                                          | Family I                      | Family J                                                  | Family K                                       | Family L                      | Family M          |                   | Family N            | Family O              | Family P                                               |                                                         | Family Q                                         |
| Individual                                               | 21                            | 22                                                        | 23                                             | 24                            | 25                | 26                | 27                  | 28                    | 29                                                     | 30                                                      | 31                                               |
| Gender, Age (years)                                      | M, 2                          | F, 2.5                                                    | M, 10                                          | M, 3                          | F (deceased 13yo) | F, 2              | F, 3                | M, 6 months           | M, 22                                                  | M, 18                                                   | M                                                |
| Nucleotide change (NM_006578.3)                          | c.222_226delTAAA/c.737G>A     | c.222_226delTAAGA/c.242C>T                                | c.136delG/c.136delG                            | c.906C>G/c.906C>G             | c.242C>A/c.242C>A | c.242C>A/c.242C>A | c.906C>A/c.906C>A   | c.332G>A/c.906C>A     | c.906C>G/c.906C>G                                      | c.906C>G/c.906C>G                                       | Arr[Hg19] 15q21.2: (52385564_52579282)x0         |
| Amino acid change (NP_006569.1)                          | p.Asp74Glufs*52/p.(Arg246Gln) | p.Asp74Glufs*52/p.(Ser81Leu)                              | p.Glu46fs*68/p.Glu46fs*68                      | p.Tyr302*/p.Tyr302*           | p.Ser81*/p.Ser81* | p.Ser81*/p.Ser81* | p.Tyr302*/p.Tyr302* | p.Cys111Tyr/p.Tyr302* | p.Tyr302*/p.Tyr302*                                    | p.Tyr302*/p.Tyr302*                                     | /                                                |
| Birth weight                                             | 3,311 g (50th)                | 1698 g (< 1st percentile)                                 | NA                                             | NA                            | NA                | NA                | NA                  | 2700 g                | 3000 g (15 <sup>th</sup> -25 <sup>th</sup> percentile) | 2540 g (3 <sup>rd</sup> -15 <sup>th</sup> percentile)   | NA                                               |
| Ethnicity                                                | European/Caucasian            | European/Caucasian                                        | Cambodia                                       | Pakistan                      | Algeria           | Algeria           | Pakistan            | China (Han)           | Pakistan                                               | Pakistan                                                | Egypt                                            |
| Consanguinity                                            | -                             | -                                                         | + (second cousins)                             | + (first cousin once removed) | + (first cousins) | + (first cousins) | -                   | -                     | + (first cousins)                                      | + (first cousins)                                       | + (first cousins)                                |
| Altered speech development                               | +                             | +                                                         | +                                              | +                             | +                 | +                 | +                   | NA                    | +                                                      | +                                                       | +                                                |
| - Verbal understanding                                   | nonverbal                     | +                                                         | nonverbal                                      | nonverbal                     | nonverbal         | nonverbal         | nonverbal           | NA                    | +                                                      | +                                                       | +                                                |
| - Lexical production                                     | nonverbal                     | expressive speech delay (spoken vocabulary of ~ 12 words) | nonverbal                                      | nonverbal                     | nonverbal         | nonverbal         | nonverbal           | NA                    | +                                                      | +                                                       | +                                                |
| Intellectual disability (ID)                             | +                             | mild                                                      | +                                              | +                             | +                 | +                 | +                   | +                     | +                                                      | +                                                       | +                                                |
| Epilepsy                                                 | -                             | -                                                         | +                                              | +                             | +                 | +                 | +                   | +                     | +                                                      | -                                                       | +                                                |
| Sinus Sick Syndrome (SSS)                                | +                             | +                                                         | +                                              | +                             | normal ECG        | +                 | +                   | +                     | +                                                      | +                                                       | +                                                |
| - Minimum heart rate                                     | 71                            | 36                                                        | NA                                             | NA                            | NA                | NA                | NA                  | NA                    | NA                                                     | NA                                                      | 39                                               |
| - Maximum heart rate                                     | 183                           | 176                                                       | NA                                             | NA                            | NA                | NA                | NA                  | NA                    | NA                                                     | NA                                                      | NA                                               |
| - Chronotropic response                                  | NA                            | NA                                                        | NA                                             | NA                            | NA                | NA                | NA                  | NA                    | NA                                                     | NA                                                      | NA                                               |
| - Escape beats                                           | + (prior to pacing)           | +                                                         | +                                              | +                             | NA                | NA                | NA                  | NA                    | +                                                      | NA                                                      | NA                                               |
| - Pacemaker implantation                                 | +                             | +                                                         | NA                                             | NA                            | NA                | NA                | NA                  | NA                    | +                                                      | -                                                       | -                                                |
| - Heart structural abnormalities                         | -                             | -                                                         | NA                                             | NA                            | NA                | NA                | NA                  | NA                    | NA                                                     | NA                                                      | PFO and ductus arteriosus (spontaneously closed) |
| Hypotonia                                                | +                             | +                                                         | (contractures, nonambulatory, no head control) | +                             | +                 | +                 | +                   | +                     | +                                                      | (lost gross- and fine- motor functions)                 | +                                                |
| Pathological gastric reflux                              | +                             | -                                                         | +                                              | NA                            | NA                | NA                | NA                  | +                     | +                                                      | +                                                       | +                                                |
| Nystagmus                                                | +                             | strabismus (surgically corrected at 16 mo)                | NA                                             | +                             | +                 | +                 | +                   | NA                    | +                                                      | (lateral gaze nystagmus), strabismus, poor eye fixation | +                                                |
| Retinal Disease                                          | +                             | -                                                         | +                                              | NA                            | NA                | +                 | +                   | NA                    | NA                                                     | NA                                                      | +                                                |
| Metabolic work-up<br>- Plasma amino acids chromatography | NA                            | NA                                                        | NA                                             | NA                            | NA                | NA                | NA                  | NA                    | NA                                                     | NA                                                      | NA                                               |

| - Urine organic acids        | NA                                                                                                                                                                                                                                                                                                | NA                                                                                            | NA                                  | NA           | NA | NA | NA | NA                                                  | NA                    | NA                                                                                                                                             | NA                                                                       | NA                                                                              |
|------------------------------|---------------------------------------------------------------------------------------------------------------------------------------------------------------------------------------------------------------------------------------------------------------------------------------------------|-----------------------------------------------------------------------------------------------|-------------------------------------|--------------|----|----|----|-----------------------------------------------------|-----------------------|------------------------------------------------------------------------------------------------------------------------------------------------|--------------------------------------------------------------------------|---------------------------------------------------------------------------------|
| <b>Others</b>                | left-sided hearing loss, intermittent extremity hypertonia, intermittent upper extremity jerking motions - sometimes in conjunction with a stimulus, laryngomalacia, hypertonia, clenched hands, high-voltage cortical activity (EEG), pain of unknown etiology, thin corpus callosum (brain MRI) | bilateral tympanostomy tubes; high activity level and short attentions span compared to peers | pyloric stenosis, G-tube, scoliosis | NA           | NA | NA | NA | long posterior corpus callosum, central sleep apnea | Adams-Stokes syndrome | cerebral palsy; spasticity of upper and lower extremities, erratic sleep pattern; G-tube feeding; food allergy; intermittent urinary retention | Indication of optic nerve atrophy (small, anomalous, tilted, pale discs) | bilateral ventricular and cerebral sulci enlargement on MRI; episodic bradypnea |
| <b>Dysmorphic feature(s)</b> | NA                                                                                                                                                                                                                                                                                                | plagiocephaly associated with torticollis at 8 mo (solved with molding helmet therapy)        | NA                                  | microcephaly | NA | NA | NA | NA                                                  | -                     | -                                                                                                                                              | -                                                                        | -                                                                               |
| <b>Family history</b>        | maternal uncle and paternal first-cousin suspected to have ASD                                                                                                                                                                                                                                    | NA                                                                                            | NA                                  | NA           | NA | NA | NA | -                                                   | -                     | one sibling (individual 30) with similar phenotype                                                                                             | -                                                                        | parental couple experienced five previous miscarriages                          |

|                                        | This study                                 |                       |                               |                       |                                  |                                |                                       |                                       |                                                                                 |                                   |                             |                             |                         |  |
|----------------------------------------|--------------------------------------------|-----------------------|-------------------------------|-----------------------|----------------------------------|--------------------------------|---------------------------------------|---------------------------------------|---------------------------------------------------------------------------------|-----------------------------------|-----------------------------|-----------------------------|-------------------------|--|
|                                        | Family R                                   | Family S              | Family T                      | Family U              | Family V                         | Family W                       | Family X                              |                                       |                                                                                 | Family Y                          |                             | Family Z                    |                         |  |
| Individual                             | 32                                         | 33                    | 34                            | 35                    | 36                               | 37                             | 38                                    | 39                                    | 40                                                                              | 41                                | 42                          | 43                          | 44                      |  |
| <b>Gender, Age (years)</b>             | M, 8 months (deceased)                     | M, 15                 | F, 1,2                        | F, 4                  | 2, M                             | F, 7                           | F, 5                                  | M deceased (7 yo)                     | M, 2                                                                            | F, 19                             | M, 16                       | M, 8                        | M, 6                    |  |
| <b>Nucleotide change (NM_006578.3)</b> | c.906C>G / c.906C>G                        | c.906C>G / c.906C>G   | c.644G>A / c.644G>A           | c.906C>A / c.906C>A   | c.906C>G / c.906C>G              | c.242C>G / c.242C>G            | c.88_89ins CTCAA / c.88_89ins CTCAA / | c.88_89ins CTCAA / c.88_89ins CTCAA / | c.88_89ins CTCAA / c.88_89ins CTCAA /                                           | c.176T>C / c.176T>C               | c.176T>C / c.176T>C         | c.645+1G > / c.645+1G>A     | c.645+1G > / c.645+1G>A |  |
| <b>Amino acid change (NP_006569.1)</b> | p.Tyr302* / p.Tyr302*                      | p.Tyr302* / p.Tyr302* | p.(Gly215Glu) / p.(Gly215Glu) | p.Tyr302* / p.Tyr302* | p.Tyr302* / p.Tyr302*            | p.(Ser81Trp) / p.(Ser81Trp)    | p.Argfs*26 / p.Argfs*26               | p.Argfs*26 / p.Argfs*26               | p.Argfs*26 / p.Argfs*26                                                         | p.(Leu59Pro) / p.(Leu59Pro)       | p.(Leu59Pro) / p.(Leu59Pro) | p.?                         | p.?                     |  |
| <b>Birth weight</b>                    | NA                                         | NA                    | NA                            | NA                    | NA                               | 2900 g                         | 3000 g                                | 2800 g                                | 2500 g                                                                          | 2600 g                            | 2500 g                      | NA                          | NA                      |  |
| <b>Ethnicity</b>                       | Pakistan                                   | Pakistan              | Pakistan                      | Pakistan              | Pakistan                         | Tunisia                        | Egypt                                 | Egypt                                 | Egypt                                                                           | Egypt                             | Egypt                       | Iran                        | Iran                    |  |
| <b>Consanguinity</b>                   | +                                          | +                     | +                             | +                     | +                                | + (first cousins)              | + (first cousins)                     | + (first cousins)                     | + (first cousins)                                                               | + (first cousins)                 | + (first cousins)           | + (first cousins)           | + (first cousins)       |  |
| <b>Altered speech development</b>      | +                                          | +                     | +                             | -                     | +                                | +                              | +                                     | +                                     | +                                                                               | +                                 | +                           | +                           | +                       |  |
| <b>- Verbal understanding</b>          | +                                          | +                     | no developmental milestones   | unremarkable          | NA                               | low                            | nonverbal                             | nonverbal                             | nonverbal                                                                       | nonverbal                         | nonverbal                   | no developmental milestones | delayed                 |  |
| <b>- Lexical production</b>            | +                                          | +                     | no developmental milestones   | unremarkable          | delayed (vocalization at 1.10yo) | nonverbal                      | vocalized                             | vocalized                             | nonverbal                                                                       | meaningless single syllable words | vocalized                   | nonverbal                   | NA                      |  |
| <b>Intellectual disability (ID)</b>    | +                                          | +                     | -                             | +                     | NA                               | +                              | +                                     | +                                     | +                                                                               | +                                 | +                           | +                           | +                       |  |
| <b>Epilepsy</b>                        | -                                          | +                     | -                             | -                     | +                                | normal EEG                     | +                                     | +                                     | +                                                                               | +                                 | +                           | +                           | +                       |  |
| <b>Sinus Sick Syndrome (SSS)</b>       | NA (inconsistent heart rate noted at Echo) | NA                    | +                             | NA                    | NA                               | +                              | NA                                    | NA                                    | NA                                                                              | +                                 | +                           | NA                          | NA                      |  |
| <b>- Minimum heart rate</b>            | NA                                         | NA                    | 18                            | 32                    | 29                               | 30                             | NA                                    | NA                                    | NA                                                                              | NA                                | NA                          | NA                          | NA                      |  |
| <b>- Maximum heart rate</b>            | NA                                         | 154                   | 142                           | 152                   | 158                              | 160                            | NA                                    | NA                                    | NA                                                                              | NA                                | NA                          | NA                          | NA                      |  |
| <b>- Chronotropic response</b>         | NA                                         | NA                    | NA                            | NA                    | NA                               | NA                             | NA                                    | NA                                    | NA                                                                              | NA                                | NA                          | NA                          | NA                      |  |
| <b>- Escape beats</b>                  | NA                                         | -                     | +                             | NA                    | NA                               | +                              | NA                                    | NA                                    | NA                                                                              | NA                                | +                           | NA                          | NA                      |  |
| <b>Pacemaker implantation</b>          | -                                          | -                     | -                             | -                     | -                                | -                              | -                                     | -                                     | -                                                                               | -                                 | -                           | -                           | -                       |  |
| <b>Heart structural abnormalities</b>  | -                                          | -                     | NA                            | NA                    | -                                | -                              | small atrial septal defect            | -                                     | small atrial septal defect secundum with minimal left to right shunt; small PDA | -                                 | -                           | NA                          | NA                      |  |
| <b>Hypotonia</b>                       | +                                          | + (no head control)   | + (no neck holding)           | + (no neck holding)   | + (along with hyporeflexia)      | + (impaired fine motor skills) | +                                     | +                                     | +                                                                               | +                                 | +                           | +                           | +                       |  |

|                                                       |                     |                                                                                                                                     |              |                                                                             |                                                                                                                                                                                |                                                                                                                                 |                                                                                |                                                                                                              |                                                                                                    |                                                                                                                                                   |                                                                                                                                                   |                                                    |                                                       |
|-------------------------------------------------------|---------------------|-------------------------------------------------------------------------------------------------------------------------------------|--------------|-----------------------------------------------------------------------------|--------------------------------------------------------------------------------------------------------------------------------------------------------------------------------|---------------------------------------------------------------------------------------------------------------------------------|--------------------------------------------------------------------------------|--------------------------------------------------------------------------------------------------------------|----------------------------------------------------------------------------------------------------|---------------------------------------------------------------------------------------------------------------------------------------------------|---------------------------------------------------------------------------------------------------------------------------------------------------|----------------------------------------------------|-------------------------------------------------------|
| Pathological gastric reflux                           | NA                  | +                                                                                                                                   | -            | NA                                                                          | -                                                                                                                                                                              | -                                                                                                                               | +                                                                              | -                                                                                                            | +                                                                                                  | +                                                                                                                                                 | +                                                                                                                                                 | +                                                  | +                                                     |
| Nystagmus                                             | -                   | +                                                                                                                                   | +            | no eye contact                                                              | no eye contact, convergent squint (strabismus) right eye                                                                                                                       | -                                                                                                                               | -                                                                              | +                                                                                                            | +                                                                                                  | +(mild)                                                                                                                                           | +(mild)                                                                                                                                           | +(strabismus, horizontal nystagmus)                | +(strabismus, horizontal nystagmus)                   |
| Retinal Disease                                       | NA                  | NA                                                                                                                                  | -            | NA                                                                          | myopia (-1.5)                                                                                                                                                                  | -                                                                                                                               | -                                                                              | +                                                                                                            | +                                                                                                  | +(reduced pigmentation)                                                                                                                           | +(reduced pigmentation)                                                                                                                           | -                                                  | -                                                     |
| Metabolic work-up - Plasma amino acids chromatography | NA                  | non specific                                                                                                                        | unremarkable | unremarkable                                                                | unremarkable                                                                                                                                                                   | global hypoAA, High Phe (146, N: 39-77)                                                                                         | unremarkable                                                                   | unremarkable                                                                                                 | unremarkable                                                                                       | unremarkable                                                                                                                                      | unremarkable                                                                                                                                      | unremarkable                                       | NA                                                    |
| - Urine organic acids                                 | NA                  | unremarkable                                                                                                                        | NA           | Fatty Acid Oxidation Disorder                                               | unremarkable                                                                                                                                                                   | normal                                                                                                                          | unremarkable                                                                   | unremarkable                                                                                                 | unremarkable                                                                                       | unremarkable                                                                                                                                      | unremarkable                                                                                                                                      | unremarkable                                       | NA                                                    |
| Others                                                | -                   | thinning, hypogenesis of corpus callosum, modified hypsarrhythmia breath holding spell, taking EPIVAL (VAP) and fits are controlled | -            | cerebral Atrophy on MRI                                                     | -                                                                                                                                                                              | unexplained coma secondary to sepsis in the context of digestive infection; one episode of pyelonephritis without complications | hypogenesis of corpus callosum on MRI                                          | autistic behavior                                                                                            | prominent ventricular system on MRI; dysmyelination                                                | thin dysplastic corpus callosum, abnormal increased cortical gyration                                                                             | thin dysplastic corpus callosum, abnormal increased gyration                                                                                      | muscle atrophy                                     | behavioral anomalies (laughing and hand stereotypies) |
| Dysmorphic feature(s)                                 | macrocephaly        | -                                                                                                                                   | -            | deep philtrum, micrognathia, prominent ears, disproportion of skull to face | blond hair, frontal bossing, epicanthic folds, small palpebral fissure, depressed nasal bridge, high arched palate                                                             | shorter thumbs                                                                                                                  | hypotonic face, with open mouth, downslanting palpebral fissures, low set ears | NA                                                                                                           | prominent forehead, synophrys, downslanting palpebral fissures, depressed nasal root, low set ears | long hypotonic face, with open mouth, arched eye brows, mild ptosis, prominent nose, upturned, long philtrum, thin lips, broad chin, low set ears | long hypotonic face, with open mouth, arched eye brows, mild ptosis, prominent nose, upturned, long philtrum, thin lips, broad chin, low set ears | NA                                                 | NA                                                    |
| Family history                                        | respiratory stridor | one sibling with similar phenotype died, likely due to cardiac arrest                                                               | -            | -                                                                           | paternal uncle with severe cognitive impairment and no language; maternal aunt and uncle are severely handicapped and no language, similar to the son of another maternal aunt | -                                                                                                                               | two cousins (individuals 40 and 41) with similar phenotype                     | one sibling (brother) with similar phenotype (individual 41); parental couple experienced three miscarriages | parental couple experienced three miscarriages                                                     | -                                                                                                                                                 | -                                                                                                                                                 | one sibling (individual 44) with similar phenotype | -                                                     |

Abbreviations are as follows: M: male; F: female; NA: Not Available; +: clinical trait present; -: clinical trait absent; PFO: Patent Foramen Ovale; ADHD: Attention Deficit Hyperactivity Disorder; IQ: Intelligence Quotient; ASD: Autism Spectrum Disorder; ECG: Electrocardiogram; Echo: Echocardiography; EEG: Electroencephalogram, MRI: Magnetic Resonance Imaging; G-tube: gastrostomy tube, PDA: Patent Ductus Arteriosus.

**Table S2. Pathogenicity prediction of three novel *GNB5* variants**

| Prediction tool | <i>GNB5</i> variants                                                       |                                                                  |                        |
|-----------------|----------------------------------------------------------------------------|------------------------------------------------------------------|------------------------|
|                 | p.(Ser81Trp)                                                               | p.(Gly215Glu)                                                    | p.(Leu59Pro)           |
| Mutation Taster | Disease causing (0.99)                                                     | Disease causing (0.99)                                           | Disease causing (0.99) |
| PolyPhen-2      | Probably Damaging (1)                                                      | Probably Damaging (1)                                            | Probably Damaging (1)  |
| SIFT            | Deleterious (0.00)                                                         | Deleterious (0.00)                                               | Deleterious (0.00)     |
| Provean         | Deleterious (-5.274)                                                       | Deleterious (-7.426)                                             | Deleterious (-6.156)   |
| UMD-predictor   | Pathogenic (100)                                                           | Pathogenic (99)                                                  | Pathogenic (87)        |
| FATHMM          | Damaging (-6.79)                                                           | Damaging (-6.92)                                                 | -                      |
| NNSplice        | -                                                                          | Donor increased                                                  | -                      |
| NetGene2        | -                                                                          | Activation of donor splice site                                  | -                      |
| Splicing Finder | Activation of an exonic cryptic donor site, creation of an exonic ESS site | Creation of an exonic ESS site, alteration of an exonic ESE site | -                      |
| CADD            | 31                                                                         | 29.1                                                             | 5.091                  |

**Supp. Table S3. Description of the mouse samples used for transcriptome**

| Sample name | Gnb5 genotype | Tissue     |
|-------------|---------------|------------|
| KO_At_M1    | -/-           | Atria      |
| HET_At_M2   | +/-           | Atria      |
| KO_At_M3    | -/-           | Atria      |
| HET_At_M4   | +/-           | Atria      |
| KO_At_M5    | -/-           | Atria      |
| HET_At_M6   | +/-           | Atria      |
| WT_At_M7    | +/+           | Atria      |
| WT_At_M8    | +/+           | Atria      |
| HET_At_M9   | +/-           | Atria      |
| KO_At_M10   | -/-           | Atria      |
| HET_At_M11  | +/-           | Atria      |
| KO_At_M12   | +/-           | Atria      |
| HET_At_M13  | +/-           | Atria      |
| KO_At_M14   | -/-           | Atria      |
| WT_At_M15   | +/+           | Atria      |
| WT_At_M16   | +/+           | Atria      |
| WT_At_M17   | +/+           | Atria      |
| WT_At_M18   | +/+           | Atria      |
| KO_At_M1    | -/-           | Ventricles |
| HET_At_M2   | +/-           | Ventricles |
| KO_At_M3    | -/-           | Ventricles |
| HET_At_M4   | +/-           | Ventricles |
| KO_At_M5    | -/-           | Ventricles |
| HET_At_M6   | +/-           | Ventricles |
| WT_At_M7    | +/+           | Ventricles |
| WT_At_M8    | +/+           | Ventricles |
| HET_At_M9   | +/-           | Ventricles |
| KO_At_M10   | -/-           | Ventricles |
| HET_At_M11  | +/-           | Ventricles |
| KO_At_M12   | +/-           | Ventricles |
| HET_At_M13  | +/-           | Ventricles |
| KO_At_M14   | -/-           | Ventricles |
| WT_At_M15   | +/+           | Ventricles |
| WT_At_M16   | +/+           | Ventricles |
| WT_At_M17   | +/+           | Ventricles |
| WT_At_M18   | +/+           | Ventricles |
| KO_At_M1    | -/-           | Cerebellum |
| KO_At_M3    | -/-           | Cerebellum |
| KO_At_M5    | -/-           | Cerebellum |

|           |     |                 |
|-----------|-----|-----------------|
| WT_At_M7  | +/+ | Cerebellum      |
| WT_At_M8  | +/+ | Cerebellum      |
| KO_At_M10 | -/- | Cerebellum      |
| KO_At_M12 | +/- | Cerebellum      |
| KO_At_M14 | -/- | Cerebellum      |
| WT_At_M15 | +/+ | Cerebellum      |
| WT_At_M16 | +/+ | Cerebellum      |
| WT_At_M17 | +/+ | Cerebellum      |
| WT_At_M18 | +/+ | Cerebellum      |
| KO_At_M1  | -/- | Hippocampus     |
| KO_At_M3  | -/- | Hippocampus     |
| KO_At_M5  | -/- | Hippocampus     |
| WT_At_M7  | +/+ | Hippocampus     |
| WT_At_M8  | +/+ | Hippocampus     |
| KO_At_M10 | -/- | Hippocampus     |
| KO_At_M12 | +/- | Hippocampus     |
| KO_At_M14 | -/- | Hippocampus     |
| WT_At_M15 | +/+ | Hippocampus     |
| WT_At_M16 | +/+ | Hippocampus     |
| WT_At_M17 | +/+ | Hippocampus     |
| WT_At_M18 | +/+ | Hippocampus     |
| KO_At_M1  | -/- | Cerebral cortex |
| KO_At_M3  | -/- | Cerebral cortex |
| KO_At_M5  | -/- | Cerebral cortex |
| WT_At_M7  | +/+ | Cerebral cortex |
| WT_At_M8  | +/+ | Cerebral cortex |
| KO_At_M10 | -/- | Cerebral cortex |
| KO_At_M12 | +/- | Cerebral cortex |
| KO_At_M14 | -/- | Cerebral cortex |
| WT_At_M15 | +/+ | Cerebral cortex |
| WT_At_M16 | +/+ | Cerebral cortex |
| WT_At_M17 | +/+ | Cerebral cortex |
| WT_At_M18 | +/+ | Cerebral cortex |

Supp Table S4. List of Differentially Expressed genes at FDR 5% in *Gnb5*<sup>-/-</sup> mice - atria

| Ensembl ID         | Gene Symbol | Gene name                                                 | baseMean    | log2FoldChange | lfcSE       | stat         | pvalue    | padj      |
|--------------------|-------------|-----------------------------------------------------------|-------------|----------------|-------------|--------------|-----------|-----------|
| ENSMUSG00000032192 | Gnb5        | guanine nucleotide binding protein (G protein), beta 5    | 588.3942165 | -3.98100257    | 0.125384112 | -31.7504546  | 3.13E-221 | 5.47E-217 |
| ENSMUSG00000033419 | Snap91      | synaptosomal-associated protein 91                        | 593.4008865 | -2.204605213   | 0.126013386 | -17.49500813 | 1.56E-68  | 1.37E-64  |
| ENSMUSG00000048758 | Rpl29       | ribosomal protein L29                                     | 199.1838179 | -3.250034673   | 0.22769114  | -14.2738741  | 3.18E-46  | 1.39E-42  |
| ENSMUSG00000032224 | Fam81a      | family with sequence similarity 81, member A              | 292.8574685 | 2.572498612    | 0.253223883 | 10.15898889  | 3.02E-24  | 1.06E-20  |
| ENSMUSG00000032179 | Bmp5        | bone morphogenetic protein 5                              | 205.0671832 | 1.328934231    | 0.136737848 | 9.718847054  | 2.51E-22  | 7.30E-19  |
| ENSMUSG00000033590 | Myo5c       | myosin VC                                                 | 163.7773657 | -1.49164629    | 0.195137706 | -7.644070025 | 2.10E-14  | 5.26E-11  |
| ENSMUSG00000023979 | Guca1b      | guanylate cyclase activator 1B                            | 58.67765502 | 1.533209378    | 0.212719605 | 7.207654307  | 5.69E-13  | 1.24E-09  |
| ENSMUSG00000039716 | Dock3       | dedicator of cyto-kinesis 3                               | 188.3304401 | -1.168897128   | 0.168267704 | -6.94665168  | 3.74E-12  | 7.27E-09  |
| ENSMUSG00000032184 | Lysmd2      | LysM, putative peptidoglycan-binding, domain containing 2 | 586.6508467 | 0.667351463    | 0.097089163 | 6.873593728  | 6.26E-12  | 1.09E-08  |
| ENSMUSG00000023249 | Parp3       | poly (ADP-ribose) polymerase family, member 3             | 1837.440683 | -0.66820649    | 0.10214733  | -6.541595295 | 6.09E-11  | 9.68E-08  |
| ENSMUSG00000032556 | Bfsp2       | beaded filament structural protein 2, phakinin            | 57.65614782 | -2.234680029   | 0.347888403 | -6.423554248 | 1.33E-10  | 1.94E-07  |
| ENSMUSG00000042073 | Abhd14b     | abhydrolase domain containing 14b                         | 580.8699606 | -0.801977921   | 0.127326525 | -6.298592679 | 3.00E-10  | 4.04E-07  |
| ENSMUSG00000032579 | Hemk1       | HemK methyltransferase family member 1                    | 597.5715156 | 0.879217891    | 0.141144598 | 6.229199738  | 4.69E-10  | 5.56E-07  |
| ENSMUSG00000032872 | Cyb5r4      | cytochrome b5 reductase 4                                 | 1656.745906 | -0.509974877   | 0.081905477 | -6.226383107 | 4.77E-10  | 5.56E-07  |
| ENSMUSG00000066456 | Hmgn3       | high mobility group nucleosomal binding domain 3          | 282.7147136 | -0.762798777   | 0.13316698  | -5.728137557 | 1.02E-08  | 1.11E-05  |
| ENSMUSG00000031849 | Comp        | cartilage oligomeric matrix protein                       | 1890.434541 | 0.863942512    | 0.156893591 | 5.506550687  | 3.66E-08  | 3.76E-05  |
| ENSMUSG00000043587 | Pxylp1      | 2-phosphoxylose phosphatase 1                             | 553.184341  | -1.06209914    | 0.195018224 | -5.446153283 | 5.15E-08  | 5.00E-05  |
| ENSMUSG00000032563 | Mrpl3       | mitochondrial ribosomal protein L3                        | 1799.161022 | -0.582173662   | 0.107712274 | -5.404896214 | 6.48E-08  | 5.97E-05  |



|                    |          |                                                                                                |             |              |             |              |          |          |
|--------------------|----------|------------------------------------------------------------------------------------------------|-------------|--------------|-------------|--------------|----------|----------|
| ENSMUSG00000010057 | Nprl2    | NPR2 like, GATOR1 complex subunit                                                              | 671.0578114 | 0.433311959  | 0.080955871 | 5.352446372  | 8.68E-08 | 7.23E-05 |
| ENSMUSG00000044938 | Klhl31   | kelch-like 31                                                                                  | 2434.146223 | -0.686725512 | 0.129907316 | -5.286272829 | 1.25E-07 | 9.92E-05 |
| ENSMUSG00000029683 | Lmod2    | leiomodion 2 (cardiac)                                                                         | 11173.11087 | -0.54016025  | 0.102389096 | -5.275564196 | 1.32E-07 | 1.01E-04 |
| ENSMUSG00000015354 | Pcolce2  | procollagen C-endopeptidase enhancer 2                                                         | 1381.444784 | 0.377432306  | 0.072416176 | 5.21198893   | 1.87E-07 | 1.36E-04 |
| ENSMUSG00000113637 | Gm7049   | predicted gene 7049                                                                            | 15.78647891 | 2.22274028   | 0.431035014 | 5.156751094  | 2.51E-07 | 1.76E-04 |
| ENSMUSG00000039313 | Minar1   | membrane integral NOTCH2 associated receptor 1                                                 | 31.93558633 | 1.962031653  | 0.383199078 | 5.120136678  | 3.05E-07 | 2.05E-04 |
| ENSMUSG00000078137 | Ankrd63  | ankyrin repeat domain 63                                                                       | 231.3397505 | 0.742695994  | 0.148629054 | 4.99697718   | 5.82E-07 | 3.77E-04 |
| ENSMUSG00000063564 | Col23a1  | collagen, type XXIII, alpha 1                                                                  | 520.8704226 | 0.624586575  | 0.126165837 | 4.950520603  | 7.40E-07 | 4.62E-04 |
| ENSMUSG00000038156 | Spon1    | spondin 1, (f-spondin) extracellular matrix protein                                            | 3543.885101 | 0.371254886  | 0.075961149 | 4.887431184  | 1.02E-06 | 6.16E-04 |
| ENSMUSG00000032058 | Ppp2r1b  | protein phosphatase 2, regulatory subunit A, beta                                              | 374.2643884 | 0.599231525  | 0.123151982 | 4.86578874   | 1.14E-06 | 6.65E-04 |
| ENSMUSG00000041112 | Elmo1    | engulfment and cell motility 1                                                                 | 700.2407007 | 0.415448791  | 0.085517427 | 4.858059972  | 1.19E-06 | 6.69E-04 |
| ENSMUSG00000091537 | Tma7     | translational machinery associated 7                                                           | 483.7361455 | -0.685576063 | 0.143465638 | -4.77867782  | 1.76E-06 | 9.64E-04 |
| ENSMUSG00000022206 | Npr3     | natriuretic peptide receptor 3                                                                 | 11899.26299 | 0.399734149  | 0.083783676 | 4.771026642  | 1.83E-06 | 9.71E-04 |
| ENSMUSG00000032370 | Lactb    | lactamase, beta                                                                                | 346.157966  | -0.422281978 | 0.09066889  | -4.65740759  | 3.20E-06 | 1.65E-03 |
| ENSMUSG00000043719 | Col6a6   | collagen, type VI, alpha 6                                                                     | 1411.565721 | 0.828808973  | 0.179039549 | 4.629194943  | 3.67E-06 | 1.83E-03 |
| ENSMUSG00000026638 | Irf6     | interferon regulatory factor 6                                                                 | 354.4281902 | 0.612952619  | 0.132744643 | 4.61753185   | 3.88E-06 | 1.89E-03 |
| ENSMUSG00000033453 | Adamts15 | a disintegrin-like and metallopeptidase (reprolysin type) with thrombospondin type 1 motif, 15 | 1535.603828 | 0.567295151  | 0.123255032 | 4.60261251   | 4.17E-06 | 1.97E-03 |
| ENSMUSG00000032498 | Mlh1     | mutL homolog 1                                                                                 | 433.7803123 | -0.38578188  | 0.084367758 | -4.572622185 | 4.82E-06 | 2.22E-03 |
| ENSMUSG00000028476 | Reck     | reversion-inducing-cysteine-rich protein with kazal motifs                                     | 744.0022468 | 0.325339922  | 0.071357088 | 4.559321694  | 5.13E-06 | 2.30E-03 |

|                    |               |                                                                 |             |              |             |              |          |          |
|--------------------|---------------|-----------------------------------------------------------------|-------------|--------------|-------------|--------------|----------|----------|
| ENSMUSG00000021596 | Mctp1         | multiple C2 domains, transmembrane 1                            | 179.9515026 | 0.502011368  | 0.111477268 | 4.5032622    | 6.69E-06 | 2.93E-03 |
| ENSMUSG00000090626 | Tex9          | testis expressed gene 9                                         | 278.1642117 | -0.734429387 | 0.163584055 | -4.489614741 | 7.14E-06 | 3.04E-03 |
| ENSMUSG00000032567 | Aste1         | asteroid homolog 1                                              | 192.4949534 | -0.666334448 | 0.14938301  | -4.460577198 | 8.17E-06 | 3.40E-03 |
| ENSMUSG00000032431 | Crtap         | cartilage associated protein                                    | 1361.165212 | 0.364784746  | 0.082147038 | 4.440631755  | 8.97E-06 | 3.65E-03 |
| ENSMUSG00000049624 | Slc17a5       | solute carrier family 17 (anion/sugar transporter), member 5    | 349.6898644 | 0.434839012  | 0.09846974  | 4.415965889  | 1.01E-05 | 4.00E-03 |
| ENSMUSG00000053040 | Aph1c         | aph1 homolog C, gamma secretase subunit                         | 68.79153406 | -0.82659287  | 0.187704162 | -4.403700279 | 1.06E-05 | 4.14E-03 |
| ENSMUSG00000024806 | Mlana         | melan-A                                                         | 1627.583495 | 0.52838317   | 0.122891802 | 4.299580298  | 1.71E-05 | 6.51E-03 |
| ENSMUSG00000028132 | Tmem56        | transmembrane protein 56                                        | 245.5306833 | -0.815298268 | 0.191265107 | -4.262660763 | 2.02E-05 | 7.52E-03 |
| ENSMUSG00000090215 | Trim34b       | tripartite motif-containing 34B                                 | 11.6973086  | -2.582632252 | 0.607008212 | -4.254690792 | 2.09E-05 | 7.63E-03 |
| ENSMUSG00000028396 | 2310002L09Rik | RIKEN cDNA 2310002L09 gene                                      | 344.3905263 | -0.626139305 | 0.147377011 | -4.248554772 | 2.15E-05 | 7.68E-03 |
| ENSMUSG00000037736 | Limch1        | LIM and calponin homology domains 1                             | 5228.144385 | -0.312723246 | 0.073777902 | -4.238711583 | 2.25E-05 | 7.86E-03 |
| ENSMUSG00000031980 | Agt           | angiotensinogen (serpin peptidase inhibitor, clade A, member 8) | 524.2715869 | -0.609713334 | 0.144159559 | -4.229433963 | 2.34E-05 | 7.97E-03 |
| ENSMUSG00000040848 | Sft2d2        | SFT2 domain containing 2                                        | 2529.424876 | 0.234751352  | 0.055536798 | 4.226951515  | 2.37E-05 | 7.97E-03 |
| ENSMUSG00000068227 | Il2rb         | interleukin 2 receptor, beta chain                              | 82.42680251 | 0.659994674  | 0.156469105 | 4.218051048  | 2.46E-05 | 8.13E-03 |
| ENSMUSG00000074059 | Fbxw18        | F-box and WD-40 domain protein 18                               | 62.68513319 | 3.258911738  | 0.774283545 | 4.208938393  | 2.57E-05 | 8.31E-03 |
| ENSMUSG00000078307 | AI593442      | expressed sequence AI593442                                     | 39.35947148 | -1.838584277 | 0.438071347 | -4.196997335 | 2.70E-05 | 8.60E-03 |
| ENSMUSG00000019102 | Aldh3a1       | aldehyde dehydrogenase family 3, subfamily A1                   | 66.67934433 | 1.063561484  | 0.253673991 | 4.192631185  | 2.76E-05 | 8.61E-03 |
| ENSMUSG00000100782 | Gm28231       | predicted gene 28231                                            | 22.5434237  | 1.248506266  | 0.301217727 | 4.144863178  | 3.40E-05 | 1.04E-02 |
| ENSMUSG00000051855 | Mest          | mesoderm specific transcript                                    | 455.3390815 | 0.528823455  | 0.129171073 | 4.093977412  | 4.24E-05 | 1.28E-02 |
| ENSMUSG00000045594 | Glb1          | galactosidase, beta 1                                           | 946.3638084 | -0.476991352 | 0.11686762  | -4.081467171 | 4.48E-05 | 1.31E-02 |

|                     |               |                                                   |             |              |             |              |          |          |
|---------------------|---------------|---------------------------------------------------|-------------|--------------|-------------|--------------|----------|----------|
| ENSMUSG00000053093  | Myh7          | myosin, heavy polypeptide 7, cardiac muscle, beta | 251.3134444 | -0.866946809 | 0.212498462 | -4.079779212 | 4.51E-05 | 1.31E-02 |
| ENSMUSG00000006941  | Eif1b         | eukaryotic translation initiation factor 1B       | 1363.496793 | -0.405756831 | 0.100156813 | -4.051215455 | 5.10E-05 | 1.40E-02 |
| ENSMUSG00000032342  | Mto1          | mitochondrial tRNA translation optimization 1     | 741.1169021 | -0.255310451 | 0.063047704 | -4.04948058  | 5.13E-05 | 1.40E-02 |
| ENSMUSG000000111278 | Gm32743       | predicted gene 32743                              | 25.8092539  | -1.363865868 | 0.336722402 | -4.050416183 | 5.11E-05 | 1.40E-02 |
| ENSMUSG000000050640 | Tmem150c      | transmembrane protein 150C                        | 40.08771757 | -1.128379631 | 0.279418769 | -4.038310072 | 5.38E-05 | 1.45E-02 |
| ENSMUSG000000056880 | Gadl1         | glutamate decarboxylase-like 1                    | 41.12226685 | -1.172852268 | 0.291809453 | -4.019240144 | 5.84E-05 | 1.55E-02 |
| ENSMUSG00000006587  | Snai3         | snail family zinc finger 3                        | 38.46789747 | -1.556170083 | 0.3914073   | -3.975833063 | 7.01E-05 | 1.83E-02 |
| ENSMUSG000000032860 | P2ry2         | purinergic receptor P2Y, G-protein coupled 2      | 427.8475396 | -0.417060355 | 0.105028679 | -3.970918781 | 7.16E-05 | 1.84E-02 |
| ENSMUSG000000021622 | Ckmt2         | creatine kinase, mitochondrial 2                  | 30570.15221 | -0.358321877 | 0.09037697  | -3.964747643 | 7.35E-05 | 1.86E-02 |
| ENSMUSG000000104344 | Gm38077       | predicted gene 38077                              | 110.0410307 | -0.694683493 | 0.17726808  | -3.918830127 | 8.90E-05 | 2.22E-02 |
| ENSMUSG000000032181 | Scg3          | secretogranin III                                 | 41.68914485 | 1.290206572  | 0.330188439 | 3.907485597  | 9.33E-05 | 2.30E-02 |
| ENSMUSG000000020253 | Ppm1m         | protein phosphatase 1M                            | 612.6332904 | 0.364501693  | 0.094443251 | 3.859478465  | 1.14E-04 | 2.76E-02 |
| ENSMUSG000000097088 | Gm26615       | predicted gene 26615                              | 43.50706638 | 0.836267574  | 0.216957467 | 3.854523129  | 1.16E-04 | 2.78E-02 |
| ENSMUSG000000010064 | Slc38a3       | solute carrier family 38, member 3                | 1610.204165 | -0.651101006 | 0.169436841 | -3.842735747 | 1.22E-04 | 2.80E-02 |
| ENSMUSG000000031709 | Tbc1d9        | TBC1 domain family, member 9                      | 542.8723027 | 0.411804108  | 0.107166775 | 3.842647212  | 1.22E-04 | 2.80E-02 |
| ENSMUSG000000034533 | Scn10a        | sodium channel, voltage-gated, type X, alpha      | 703.8602467 | 0.70040763   | 0.183064182 | 3.826022233  | 1.30E-04 | 2.88E-02 |
| ENSMUSG000000040875 | Osbpl10       | oxysterol binding protein-like 10                 | 79.84746132 | -0.766643335 | 0.200280981 | -3.82783892  | 1.29E-04 | 2.88E-02 |
| ENSMUSG000000101257 | 2310015K22Rik | RIKEN cDNA 2310015K22 gene                        | 12.05415905 | -1.633324502 | 0.426600907 | -3.828694395 | 1.29E-04 | 2.88E-02 |
| ENSMUSG000000019817 | Plagl1        | pleiomorphic adenoma gene-like 1                  | 2018.952602 | 0.453482958  | 0.119673938 | 3.789320943  | 1.51E-04 | 3.29E-02 |
| ENSMUSG000000019890 | Nts           | neurotensin                                       | 85.16574876 | -0.855082132 | 0.225793704 | -3.787006094 | 1.52E-04 | 3.29E-02 |
| ENSMUSG000000030515 | Tarsl2        | threonyl-tRNA synthetase-like 2                   | 1170.685678 | -0.243655404 | 0.064511345 | -3.776938834 | 1.59E-04 | 3.39E-02 |
| ENSMUSG00000006611  | Hfe           | hemochromatosis                                   | 890.846647  | 0.435320115  | 0.11562911  | 3.764796886  | 1.67E-04 | 3.51E-02 |

|                     |               |                                                                      |             |              |             |              |          |          |
|---------------------|---------------|----------------------------------------------------------------------|-------------|--------------|-------------|--------------|----------|----------|
| ENSMUSG00000045967  | Gpr158        | G protein-coupled receptor 158                                       | 373.298715  | -0.686733554 | 0.18272265  | -3.75833841  | 1.71E-04 | 3.52E-02 |
| ENSMUSG00000047686  | Rtl3          | retrotransposon Gag like 3                                           | 266.2423324 | 0.760639578  | 0.20238611  | 3.758358611  | 1.71E-04 | 3.52E-02 |
| ENSMUSG00000035606  | Ky            | kyphoscoliosis peptidase                                             | 125.6420813 | -0.986271443 | 0.263125553 | -3.748292139 | 1.78E-04 | 3.61E-02 |
| ENSMUSG00000074207  | Adh1          | alcohol dehydrogenase 1 (class I)                                    | 1168.841709 | 0.378713887  | 0.101093013 | 3.746192504  | 1.80E-04 | 3.61E-02 |
| ENSMUSG00000000184  | Ccnd2         | cyclin D2                                                            | 7244.566123 | 0.321075122  | 0.085868752 | 3.739138085  | 1.85E-04 | 3.67E-02 |
| ENSMUSG00000021557  | Agtppb1       | ATP/GTP binding protein 1                                            | 3779.137522 | -0.28831125  | 0.077403559 | -3.724780271 | 1.95E-04 | 3.84E-02 |
| ENSMUSG00000021557  | A230056J06Rik | RIKEN cDNA A230056J06 gene                                           | 3779.137522 | -0.28831125  | 0.077403559 | -3.724780271 | 1.95E-04 | 3.84E-02 |
| ENSMUSG000000043795 | Prr33         | proline rich 33                                                      | 112.7136835 | -0.776040696 | 0.208764671 | -3.717298975 | 2.01E-04 | 3.91E-02 |
| ENSMUSG00000026604  | Ptpn14        | protein tyrosine phosphatase, non-receptor type 14                   | 3680.35312  | 0.257384789  | 0.069385735 | 3.70947703   | 2.08E-04 | 3.99E-02 |
| ENSMUSG00000029359  | Tesc          | tescalcin                                                            | 181.5637758 | -0.947384507 | 0.256043393 | -3.700093552 | 2.16E-04 | 4.05E-02 |
| ENSMUSG00000031637  | Lrp2bp        | Lrp2 binding protein                                                 | 140.0742862 | -0.59046599  | 0.159527357 | -3.701346278 | 2.14E-04 | 4.05E-02 |
| ENSMUSG00000021957  | Tkt           | transketolase                                                        | 1797.82233  | 0.732078661  | 0.198124968 | 3.695034851  | 2.20E-04 | 4.06E-02 |
| ENSMUSG00000061780  | Cfd           | complement factor D (adipsin)                                        | 904.2314372 | 2.994362377  | 0.810510725 | 3.694414255  | 2.20E-04 | 4.06E-02 |
| ENSMUSG00000037887  | Dusp8         | dual specificity phosphatase 8                                       | 774.5163123 | -0.572804466 | 0.155345266 | -3.68729915  | 2.27E-04 | 4.13E-02 |
| ENSMUSG00000091345  | Col6a5        | collagen, type VI, alpha 5                                           | 326.9932512 | 2.283384011  | 0.622617345 | 3.667395437  | 2.45E-04 | 4.42E-02 |
| ENSMUSG00000060639  | Hist1h4i      | histone cluster 1, H4i                                               | 144.8255591 | -0.691858999 | 0.188964427 | -3.661318753 | 2.51E-04 | 4.48E-02 |
| ENSMUSG00000064371  | mt-Tt         | mitochondrially encoded tRNA threonine                               | 67.46562005 | -0.989792385 | 0.27087529  | -3.654051962 | 2.58E-04 | 4.56E-02 |
| ENSMUSG00000034485  | Uaca          | uveal autoantigen with coiled-coil domains and ankyrin repeats       | 1707.508249 | -0.254012029 | 0.069644209 | -3.647281416 | 2.65E-04 | 4.63E-02 |
| ENSMUSG00000059742  | Kcnh7         | potassium voltage-gated channel, subfamily H (eag-related), member 7 | 286.2843348 | 0.587508859  | 0.161412283 | 3.639802667  | 2.73E-04 | 4.72E-02 |

Supp Table S5. List of Differentially Expressed genes at FDR 5% in *Gnb5*<sup>-/-</sup> mice - ventricle

| Ensembl ID         | Gene Symbol | Gene name                                              | baseMean    | log2FoldChange | lfcSE       | stat         | pvalue    | padj      |
|--------------------|-------------|--------------------------------------------------------|-------------|----------------|-------------|--------------|-----------|-----------|
| ENSMUSG00000032192 | Gnb5        | guanine nucleotide binding protein (G protein), beta 5 | 313.5699776 | -4.21550606    | 0.154170849 | -27.34308137 | 1.31E-164 | 2.19E-160 |
| ENSMUSG00000033419 | Snap91      | synaptosomal-associated protein 91                     | 130.8116563 | -2.993668387   | 0.230324744 | -12.9975978  | 1.26E-38  | 1.06E-34  |
| ENSMUSG00000048758 | Rpl29       | ribosomal protein L29                                  | 148.0555782 | -2.768271599   | 0.258451771 | -10.71097942 | 9.04E-27  | 5.05E-23  |
| ENSMUSG00000032224 | Fam81a      | family with sequence similarity 81, member A           | 535.3572241 | 1.400193385    | 0.158370442 | 8.841254493  | 9.46E-19  | 3.96E-15  |
| ENSMUSG00000032579 | Hemk1       | HemK methyltransferase family member 1                 | 699.5483486 | 1.255117802    | 0.16788463  | 7.476073332  | 7.66E-14  | 2.57E-10  |
| ENSMUSG00000113637 | Gm7049      | predicted gene 7049                                    | 16.81236237 | 2.249097307    | 0.306354635 | 7.341482876  | 2.11E-13  | 5.90E-10  |
| ENSMUSG00000111765 | Gm10635     | predicted gene 10635                                   | 108.9820339 | -1.98648208    | 0.288335345 | -6.889485152 | 5.60E-12  | 1.34E-08  |
| ENSMUSG00000066456 | Hmgn3       | high mobility group nucleosomal binding domain 3       | 80.22459437 | -1.098602846   | 0.160705843 | -6.836110138 | 8.14E-12  | 1.70E-08  |
| ENSMUSG00000023249 | Parp3       | poly (ADP-ribose) polymerase family, member 3          | 1606.053611 | -0.717032187   | 0.109004266 | -6.578019501 | 4.77E-11  | 8.88E-08  |
| ENSMUSG00000010057 | Nprl2       | NPR2 like, GATOR1 complex subunit                      | 491.5575602 | 0.487515133    | 0.082544171 | 5.906112138  | 3.50E-09  | 5.34E-06  |
| ENSMUSG00000100782 | Gm28231     | predicted gene 28231                                   | 48.63773997 | 1.405293992    | 0.238858846 | 5.883365906  | 4.02E-09  | 5.61E-06  |
| ENSMUSG00000020902 | Ntn1        | netrin 1                                               | 2523.450781 | 0.593131025    | 0.102551465 | 5.783740167  | 7.31E-09  | 9.42E-06  |
| ENSMUSG00000019817 | Plagl1      | pleiomorphic adenoma gene-like 1                       | 76.29245071 | 0.819492865    | 0.146652951 | 5.587973925  | 2.30E-08  | 2.57E-05  |
| ENSMUSG00000042073 | Abhd14b     | abhydrolase domain containing 14b                      | 312.5043269 | -0.742734019   | 0.132845695 | -5.590952862 | 2.26E-08  | 2.57E-05  |
| ENSMUSG00000038801 | Scgb1c1     | secretoglobin, family 1C, member 1                     | 193.8961    | 1.137948154    | 0.205183249 | 5.546009029  | 2.92E-08  | 2.88E-05  |
| ENSMUSG00000097099 | Gm9917      | predicted gene 9917                                    | 111.2305592 | -0.971774724   | 0.179085224 | -5.426325529 | 5.75E-08  | 5.35E-05  |
| ENSMUSG00000107653 | Gm31520     | sterol-C5-desaturase pseudogene                        | 38.9097343  | 1.461818509    | 0.276075681 | 5.294991955  | 1.19E-07  | 1.05E-04  |
| ENSMUSG00000032419 | Tbx18       | T-box18                                                | 104.4903783 | -0.654370039   | 0.125020141 | -5.234116949 | 1.66E-07  | 1.32E-04  |
| ENSMUSG00000020253 | Ppm1m       | protein phosphatase 1M                                 | 224.4754793 | 0.629411893    | 0.120929771 | 5.204772037  | 1.94E-07  | 1.48E-04  |
| ENSMUSG00000032563 | Mrpl3       | mitochondrial ribosomal protein L3                     | 1783.956096 | -0.436886258   | 0.085393676 | -5.116143011 | 3.12E-07  | 2.27E-04  |

|                    |               |                                                                             |             |              |             |              |          |          |
|--------------------|---------------|-----------------------------------------------------------------------------|-------------|--------------|-------------|--------------|----------|----------|
| ENSMUSG00000032261 | Sh3bgrl2      | SH3 domain binding glutamic acid-rich protein like 2                        | 105.6921769 | -0.653725    | 0.128760505 | -5.077061488 | 3.83E-07 | 2.68E-04 |
| ENSMUSG00000023979 | Guca1b        | guanylate cyclase activator 1B                                              | 25.91071064 | 1.315395153  | 0.259962618 | 5.059939622  | 4.19E-07 | 2.81E-04 |
| ENSMUSG00000091345 | Col6a5        | collagen, type VI, alpha 5                                                  | 29.84898234 | 1.907639946  | 0.3775694   | 5.052422015  | 4.36E-07 | 2.81E-04 |
| ENSMUSG00000032359 | Ctsh          | cathepsin H                                                                 | 710.7231171 | -0.623022117 | 0.125532066 | -4.963051582 | 6.94E-07 | 4.15E-04 |
| ENSMUSG00000022219 | Cideb         | cell death-inducing DNA fragmentation factor, alpha subunit-like effector B | 74.13239706 | 0.858582759  | 0.175534791 | 4.891239831  | 1.00E-06 | 5.79E-04 |
| ENSMUSG00000010064 | Slc38a3       | solute carrier family 38, member 3                                          | 2341.478262 | -0.809203125 | 0.167037335 | -4.844444656 | 1.27E-06 | 7.09E-04 |
| ENSMUSG00000032259 | Drd2          | dopamine receptor D2                                                        | 85.88598789 | 0.839883098  | 0.174723741 | 4.8069203    | 1.53E-06 | 8.28E-04 |
| ENSMUSG00000032537 | Ephb1         | Eph receptor B1                                                             | 585.1805641 | 2.398021253  | 0.521600636 | 4.597427777  | 4.28E-06 | 2.24E-03 |
| ENSMUSG00000104344 | Gm38077       | predicted gene 38077                                                        | 168.5348807 | -0.988910029 | 0.216709138 | -4.563305623 | 5.04E-06 | 2.56E-03 |
| ENSMUSG00000030990 | Pgap2         | post-GPI attachment to proteins 2                                           | 688.9552575 | 0.468413015  | 0.104101368 | 4.499585592  | 6.81E-06 | 3.36E-03 |
| ENSMUSG00000062270 | Morf4l1       | mortality factor 4 like 1                                                   | 1196.914037 | -0.415696122 | 0.093949616 | -4.424670816 | 9.66E-06 | 4.62E-03 |
| ENSMUSG00000062270 | Morf4l1b      | mortality factor 4 like 1B                                                  | 1196.914037 | -0.415696122 | 0.093949616 | -4.424670816 | 9.66E-06 | 4.62E-03 |
| ENSMUSG00000032872 | Cyb5r4        | cytochrome b5 reductase 4                                                   | 1012.878713 | -0.551302186 | 0.125317439 | -4.399245566 | 1.09E-05 | 4.92E-03 |
| ENSMUSG00000079355 | Ackr4         | atypical chemokine receptor 4                                               | 94.67720248 | -0.760983138 | 0.172765696 | -4.404712012 | 1.06E-05 | 4.92E-03 |
| ENSMUSG00000020431 | Adcy1         | adenylate cyclase 1                                                         | 97.1204426  | 0.866213531  | 0.197445358 | 4.38710508   | 1.15E-05 | 4.93E-03 |
| ENSMUSG00000023439 | Gnb3          | guanine nucleotide binding protein (G protein), beta 3                      | 256.1773659 | 0.925120884  | 0.249262978 | 3.711425138  | 2.06E-04 | 5.21E-03 |
| ENSMUSG00000043587 | Pxylp1        | 2-phosphoxylose phosphatase 1                                               | 148.4011593 | -0.941500636 | 0.215647645 | -4.365921245 | 1.27E-05 | 5.21E-03 |
| ENSMUSG00000100410 | 2310020H05Rik | RIKEN cDNA 2310020H05 gene                                                  | 82.70867895 | -0.95306705  | 0.218380045 | -4.364258874 | 1.28E-05 | 5.21E-03 |
| ENSMUSG00000023262 | Acy1          | aminoacylase 1                                                              | 275.312161  | 0.52627658   | 0.12086618  | 4.354208773  | 1.34E-05 | 5.28E-03 |
| ENSMUSG00000032420 | Nt5e          | 5' nucleotidase, ecto                                                       | 531.2462273 | 0.575371191  | 0.132243883 | 4.35083406   | 1.36E-05 | 5.28E-03 |
| ENSMUSG00000032342 | Mto1          | mitochondrial tRNA translation optimization 1                               | 628.7435289 | -0.35212118  | 0.081316245 | -4.330268576 | 1.49E-05 | 5.54E-03 |

|                    |         |                                                          |             |              |             |              |          |          |
|--------------------|---------|----------------------------------------------------------|-------------|--------------|-------------|--------------|----------|----------|
| ENSMUSG00000036006 | Ripor2  | RHO family interacting cell polarization regulator 2     | 280.1521625 | 0.766998221  | 0.178845813 | 4.288600385  | 1.80E-05 | 6.55E-03 |
| ENSMUSG00000032567 | Aste1   | asteroid homolog 1                                       | 136.4175984 | -0.546329802 | 0.129600006 | -4.215507543 | 2.49E-05 | 8.88E-03 |
| ENSMUSG00000007033 | Hspa1l  | heat shock protein 1-like                                | 313.1401892 | -0.868331662 | 0.207647674 | -4.181754823 | 2.89E-05 | 1.01E-02 |
| ENSMUSG00000062991 | Nrg1    | neuregulin 1                                             | 36.63309961 | 1.167251298  | 0.281216976 | 4.150714202  | 3.31E-05 | 1.13E-02 |
| ENSMUSG00000057802 | Gm10030 | predicted gene 10030                                     | 23.54320155 | 1.146733244  | 0.277719383 | 4.129107706  | 3.64E-05 | 1.22E-02 |
| ENSMUSG00000032500 | Dclk3   | doublecortin-like kinase 3                               | 16.62670461 | 1.320424335  | 0.32048356  | 4.120100055  | 3.79E-05 | 1.24E-02 |
| ENSMUSG00000030592 | Ryr1    | ryanodine receptor 1, skeletal muscle                    | 18.10439933 | -1.213191335 | 0.295663089 | -4.103289788 | 4.07E-05 | 1.31E-02 |
| ENSMUSG00000034533 | Scn10a  | sodium channel, voltage-gated, type X, alpha             | 113.9830881 | 0.858252285  | 0.213468675 | 4.020506927  | 5.81E-05 | 1.84E-02 |
| ENSMUSG00000031066 | Usp11   | ubiquitin specific peptidase 11                          | 212.3557436 | 0.528925104  | 0.131795322 | 4.013231248  | 5.99E-05 | 1.86E-02 |
| ENSMUSG00000071708 | Sms     | spermine synthase                                        | 825.2887178 | -0.362951165 | 0.090642781 | -4.004192737 | 6.22E-05 | 1.86E-02 |
| ENSMUSG00000113321 | Gm8775  | predicted gene 8775                                      | 29.48173879 | 1.076447965  | 0.268553676 | 4.008315883  | 6.12E-05 | 1.86E-02 |
| ENSMUSG00000073485 | H3f3aos | H3 histone, family 3A                                    | 31.32162143 | -0.946720716 | 0.236742268 | -3.998950945 | 6.36E-05 | 1.87E-02 |
| ENSMUSG00000026414 | Tnnt2   | troponin T2, cardiac                                     | 217.8533484 | 0.619746386  | 0.156123287 | 3.969596064  | 7.20E-05 | 2.08E-02 |
| ENSMUSG00000031637 | Lrp2bp  | Lrp2 binding protein                                     | 63.26457812 | -1.031672567 | 0.264188857 | -3.90505709  | 9.42E-05 | 2.68E-02 |
| ENSMUSG00000045594 | Glb1    | galactosidase, beta 1                                    | 384.1377132 | -0.474925266 | 0.123283793 | -3.852292773 | 1.17E-04 | 3.27E-02 |
| ENSMUSG00000010051 | Hyal1   | hyaluronoglucosaminidase 1                               | 122.0241169 | 0.64246724   | 0.167341124 | 3.839266904  | 1.23E-04 | 3.39E-02 |
| ENSMUSG00000020534 | Shmt1   | serine hydroxymethyltransferase 1 (soluble)              | 289.1479786 | 0.655279666  | 0.171422662 | 3.822596498  | 1.32E-04 | 3.57E-02 |
| ENSMUSG00000060187 | Lrrc10  | leucine rich repeat containing 10                        | 2494.259676 | 0.407948338  | 0.111196436 | 3.668717757  | 2.44E-04 | 3.91E-02 |
| ENSMUSG00000027313 | Chac1   | ChaC, cation transport regulator 1                       | 44.4569393  | -1.241707583 | 0.328017443 | -3.785492538 | 1.53E-04 | 4.08E-02 |
| ENSMUSG00000024145 | Pigf    | phosphatidylinositol glycan anchor biosynthesis, class F | 53.55766273 | 0.70037248   | 0.186231311 | 3.760766521  | 1.69E-04 | 4.37E-02 |
| ENSMUSG00000052485 | Tmem171 | transmembrane protein 171                                | 169.2165357 | 0.76792289   | 0.204074434 | 3.762954896  | 1.68E-04 | 4.37E-02 |
| ENSMUSG00000031461 | Myom2   | myomesin 2                                               | 39422.33605 | 0.551200865  | 0.150744712 | 3.65651875   | 2.56E-04 | 4.71E-02 |

Supp. Table S6. List of Biological Processes (BP) at FDR 5% - atria

| GO ID      | Description                                   | BgRatio   | pvalue   | p.adjust | qvalue      | geneID                              | Count |
|------------|-----------------------------------------------|-----------|----------|----------|-------------|-------------------------------------|-------|
| GO:0046184 | aldehyde biosynthetic process                 | 18/21092  | 5.11E-05 | 7.82E-02 | 0.075133254 | Bmp5/Adh1/Tkt                       | 3     |
| GO:0006081 | cellular aldehyde metabolic process           | 68/21092  | 1.72E-04 | 1.32E-01 | 0.126431472 | Bmp5/Aldh3a1/Adh1/Tkt               | 4     |
| GO:0032892 | positive regulation of organic acid transport | 47/21092  | 9.32E-04 | 4.20E-01 | 0.403462799 | Agt/P2ry2/Slc38a3                   | 3     |
| GO:0015802 | basic amino acid transport                    | 14/21092  | 1.45E-03 | 4.20E-01 | 0.403462799 | Agt/Slc38a3                         | 2     |
| GO:1903793 | positive regulation of anion transport        | 63/21092  | 2.18E-03 | 4.20E-01 | 0.403462799 | Agt/P2ry2/Slc38a3                   | 3     |
| GO:0006883 | cellular sodium ion homeostasis               | 19/21092  | 2.69E-03 | 4.20E-01 | 0.403462799 | Agt/Tesc                            | 2     |
| GO:0008015 | blood circulation                             | 466/21092 | 2.94E-03 | 4.20E-01 | 0.403462799 | Comp/Npr3/Agt/Myh7/P2ry2/Scn10a/Nts | 7     |
| GO:0003013 | circulatory system process                    | 475/21092 | 3.27E-03 | 4.20E-01 | 0.403462799 | Comp/Npr3/Agt/Myh7/P2ry2/Scn10a/Nts | 7     |
| GO:0032890 | regulation of organic acid transport          | 77/21092  | 3.85E-03 | 4.20E-01 | 0.403462799 | Agt/P2ry2/Slc38a3                   | 3     |
| GO:0043687 | post-translational protein modification       | 23/21092  | 3.93E-03 | 4.20E-01 | 0.403462799 | Crtap/Agtppb1                       | 2     |
| GO:0014829 | vascular smooth muscle contraction            | 25/21092  | 4.64E-03 | 4.20E-01 | 0.403462799 | Comp/Agt                            | 2     |
| GO:0050880 | regulation of blood vessel size               | 168/21092 | 4.97E-03 | 4.20E-01 | 0.403462799 | Comp/Agt/P2ry2/Nts                  | 4     |
| GO:0035150 | regulation of tube size                       | 169/21092 | 5.07E-03 | 4.20E-01 | 0.403462799 | Comp/Agt/P2ry2/Nts                  | 4     |
| GO:0032526 | response to retinoic acid                     | 86/21092  | 5.25E-03 | 4.20E-01 | 0.403462799 | Mest/Adh1/Tesc                      | 3     |
| GO:0051957 | positive regulation of amino acid transport   | 28/21092  | 5.80E-03 | 4.20E-01 | 0.403462799 | Agt/Slc38a3                         | 2     |
| GO:0006936 | muscle contraction                            | 281/21092 | 5.87E-03 | 4.20E-01 | 0.403462799 | Comp/Lmod2/Agt/Myh7/Scn10a          | 5     |
| GO:0002027 | regulation of heart rate                      | 91/21092  | 6.14E-03 | 4.20E-01 | 0.403462799 | Agt/Myh7/Scn10a                     | 3     |
| GO:0045652 | regulation of megakaryocyte differentiation   | 30/21092  | 6.64E-03 | 4.20E-01 | 0.403462799 | Tesc/Hist1h4i                       | 2     |
| GO:1900274 | regulation of phospholipase C activity        | 30/21092  | 6.64E-03 | 4.20E-01 | 0.403462799 | Snap91/Agt                          | 2     |



|            |                                                                        |           |          |          |             |                                |   |
|------------|------------------------------------------------------------------------|-----------|----------|----------|-------------|--------------------------------|---|
| GO:0003018 | vascular process in circulatory system                                 | 193/21092 | 8.05E-03 | 4.20E-01 | 0.403462799 | Comp/Agt/P2ry2/Nts             | 4 |
| GO:0006739 | NADP metabolic process                                                 | 36/21092  | 9.46E-03 | 4.20E-01 | 0.403462799 | Cyb5r4/Tkt                     | 2 |
| GO:0042445 | hormone metabolic process                                              | 207/21092 | 1.02E-02 | 4.20E-01 | 0.403462799 | Bmp5/Agt/Hfe/Adh1              | 4 |
| GO:0031279 | regulation of cyclase activity                                         | 41/21092  | 1.22E-02 | 4.20E-01 | 0.403462799 | Guca1b/Npr3                    | 2 |
| GO:0044070 | regulation of anion transport                                          | 117/21092 | 1.22E-02 | 4.20E-01 | 0.403462799 | Agt/P2ry2/Slc38a3              | 3 |
| GO:0051339 | regulation of lyase activity                                           | 43/21092  | 1.33E-02 | 4.20E-01 | 0.403462799 | Guca1b/Npr3                    | 2 |
| GO:0032007 | negative regulation of TOR signaling                                   | 45/21092  | 1.45E-02 | 4.20E-01 | 0.403462799 | Nprl2/Minar1                   | 2 |
| GO:0010862 | positive regulation of pathway-restricted SMAD protein phosphorylation | 49/21092  | 1.71E-02 | 4.20E-01 | 0.403462799 | Bmp5/Hfe                       | 2 |
| GO:0050905 | neuromuscular process                                                  | 133/21092 | 1.72E-02 | 4.20E-01 | 0.403462799 | Comp/Tmem150c/Agtppb1          | 3 |
| GO:0032941 | secretion by tissue                                                    | 50/21092  | 1.77E-02 | 4.20E-01 | 0.403462799 | Npr3/P2ry2                     | 2 |
| GO:0051955 | regulation of amino acid transport                                     | 50/21092  | 1.77E-02 | 4.20E-01 | 0.403462799 | Agt/Slc38a3                    | 2 |
| GO:0055078 | sodium ion homeostasis                                                 | 50/21092  | 1.77E-02 | 4.20E-01 | 0.403462799 | Agt/Tesc                       | 2 |
| GO:0002064 | epithelial cell development                                            | 245/21092 | 1.80E-02 | 4.20E-01 | 0.403462799 | Bmp5/Bfsp2/Col23a1/Agt         | 4 |
| GO:0030219 | megakaryocyte differentiation                                          | 51/21092  | 1.84E-02 | 4.20E-01 | 0.403462799 | Tesc/Hist1h4i                  | 2 |
| GO:0051954 | positive regulation of amine transport                                 | 51/21092  | 1.84E-02 | 4.20E-01 | 0.403462799 | Agt/Slc38a3                    | 2 |
| GO:0001505 | regulation of neurotransmitter levels                                  | 376/21092 | 1.88E-02 | 4.20E-01 | 0.403462799 | Snap91/Mctp1/Agt/P2ry2/Agtppb1 | 5 |
| GO:0030198 | extracellular matrix organization                                      | 249/21092 | 1.89E-02 | 4.20E-01 | 0.403462799 | Comp/Col23a1/Reck/Agt          | 4 |
| GO:0034308 | primary alcohol metabolic process                                      | 52/21092  | 1.91E-02 | 4.20E-01 | 0.403462799 | Bmp5/Adh1                      | 2 |
| GO:0003012 | muscle system process                                                  | 383/21092 | 2.02E-02 | 4.20E-01 | 0.403462799 | Comp/Lmod2/Agt/Myh7/Scn10a     | 5 |
| GO:0010517 | regulation of phospholipase activity                                   | 54/21092  | 2.05E-02 | 4.20E-01 | 0.403462799 | Snap91/Agt                     | 2 |
| GO:0050879 | multicellular organismal movement                                      | 54/21092  | 2.05E-02 | 4.20E-01 | 0.403462799 | Comp/Myh7                      | 2 |
| GO:0050881 | musculoskeletal movement                                               | 54/21092  | 2.05E-02 | 4.20E-01 | 0.403462799 | Comp/Myh7                      | 2 |
| GO:1905952 | regulation of lipid localization                                       | 143/21092 | 2.07E-02 | 4.20E-01 | 0.403462799 | Agt/Mest/P2ry2                 | 3 |

|            |                                                               |           |          |          |             |                           |   |
|------------|---------------------------------------------------------------|-----------|----------|----------|-------------|---------------------------|---|
| GO:0006865 | amino acid transport                                          | 145/21092 | 2.15E-02 | 4.20E-01 | 0.403462799 | Slc17a5/Agt/Slc38a3       | 3 |
| GO:0061337 | cardiac conduction                                            | 58/21092  | 2.34E-02 | 4.20E-01 | 0.403462799 | Agt/Scn10a                | 2 |
| GO:0015807 | L-amino acid transport                                        | 59/21092  | 2.42E-02 | 4.20E-01 | 0.403462799 | Agt/Slc38a3               | 2 |
| GO:0014911 | positive regulation of smooth muscle cell migration           | 60/21092  | 2.50E-02 | 4.20E-01 | 0.403462799 | Agt/P2ry2                 | 2 |
| GO:0035296 | regulation of tube diameter                                   | 156/21092 | 2.60E-02 | 4.20E-01 | 0.403462799 | Comp/Agt/P2ry2            | 3 |
| GO:0097746 | regulation of blood vessel diameter                           | 156/21092 | 2.60E-02 | 4.20E-01 | 0.403462799 | Comp/Agt/P2ry2            | 3 |
| GO:2001238 | positive regulation of extrinsic apoptotic signaling pathway  | 62/21092  | 2.65E-02 | 4.20E-01 | 0.403462799 | Ppp2r1b/Agt               | 2 |
| GO:0006801 | superoxide metabolic process                                  | 63/21092  | 2.73E-02 | 4.20E-01 | 0.403462799 | Cyb5r4/Agt                | 2 |
| GO:0060393 | regulation of pathway-restricted SMAD protein phosphorylation | 63/21092  | 2.73E-02 | 4.20E-01 | 0.403462799 | Bmp5/Hfe                  | 2 |
| GO:1901264 | carbohydrate derivative transport                             | 64/21092  | 2.81E-02 | 4.20E-01 | 0.403462799 | Slc17a5/P2ry2             | 2 |
| GO:0060389 | pathway-restricted SMAD protein phosphorylation               | 66/21092  | 2.98E-02 | 4.20E-01 | 0.403462799 | Bmp5/Hfe                  | 2 |
| GO:0030509 | BMP signaling pathway                                         | 165/21092 | 3.00E-02 | 4.20E-01 | 0.403462799 | Bmp5/Comp/Hfe             | 3 |
| GO:0001885 | endothelial cell development                                  | 67/21092  | 3.06E-02 | 4.20E-01 | 0.403462799 | Col23a1/Agt               | 2 |
| GO:0051604 | protein maturation                                            | 291/21092 | 3.12E-02 | 4.20E-01 | 0.403462799 | Comp/Spon1/Aph1c/Tesc     | 4 |
| GO:0043062 | extracellular structure organization                          | 293/21092 | 3.19E-02 | 4.20E-01 | 0.403462799 | Comp/Col23a1/Reck/Agt     | 4 |
| GO:0046942 | carboxylic acid transport                                     | 297/21092 | 3.33E-02 | 4.20E-01 | 0.403462799 | Slc17a5/Agt/P2ry2/Slc38a3 | 4 |
| GO:0008016 | regulation of heart contraction                               | 172/21092 | 3.33E-02 | 4.20E-01 | 0.403462799 | Agt/Myh7/Scn10a           | 3 |
| GO:0015849 | organic acid transport                                        | 298/21092 | 3.36E-02 | 4.20E-01 | 0.403462799 | Slc17a5/Agt/P2ry2/Slc38a3 | 4 |
| GO:0042446 | hormone biosynthetic process                                  | 72/21092  | 3.49E-02 | 4.20E-01 | 0.403462799 | Bmp5/Hfe                  | 2 |
| GO:0071772 | response to BMP                                               | 176/21092 | 3.53E-02 | 4.20E-01 | 0.403462799 | Bmp5/Comp/Hfe             | 3 |
| GO:0071773 | cellular response to BMP stimulus                             | 176/21092 | 3.53E-02 | 4.20E-01 | 0.403462799 | Bmp5/Comp/Hfe             | 3 |
| GO:0051145 | smooth muscle cell differentiation                            | 73/21092  | 3.58E-02 | 4.20E-01 | 0.403462799 | Comp/Agt                  | 2 |
| GO:0060191 | regulation of lipase activity                                 | 73/21092  | 3.58E-02 | 4.20E-01 | 0.403462799 | Snap91/Agt                | 2 |
| GO:0003333 | amino acid transmembrane transport                            | 74/21092  | 3.67E-02 | 4.20E-01 | 0.403462799 | Agt/Slc38a3               | 2 |

|            |                                                    |           |          |          |             |                            |   |
|------------|----------------------------------------------------|-----------|----------|----------|-------------|----------------------------|---|
| GO:0007219 | Notch signaling pathway                            | 181/21092 | 3.79E-02 | 4.20E-01 | 0.403462799 | Reck/Aph1c/Cfd             | 3 |
| GO:0055002 | striated muscle cell development                   | 181/21092 | 3.79E-02 | 4.20E-01 | 0.403462799 | Comp/Lmod2/Agt             | 3 |
| GO:0043270 | positive regulation of ion transport               | 310/21092 | 3.80E-02 | 4.20E-01 | 0.403462799 | Agt/P2ry2/Slc38a3/Tesc     | 4 |
| GO:0002181 | cytoplasmic translation                            | 76/21092  | 3.86E-02 | 4.20E-01 | 0.403462799 | Rpl29/Tma7                 | 2 |
| GO:0034765 | regulation of ion transmembrane transport          | 459/21092 | 3.96E-02 | 4.20E-01 | 0.403462799 | Gnb5/Agt/Scn10a/Tesc/Kcnh7 | 5 |
| GO:0030534 | adult behavior                                     | 185/21092 | 4.00E-02 | 4.20E-01 | 0.403462799 | Adh1/Ccnd2/Agtppb1         | 3 |
| GO:0006995 | cellular response to nitrogen starvation           | 10/21092  | 4.00E-02 | 4.20E-01 | 0.403462799 | Nprl2                      | 1 |
| GO:0007220 | Notch receptor processing                          | 10/21092  | 4.00E-02 | 4.20E-01 | 0.403462799 | Aph1c                      | 1 |
| GO:0014883 | transition between fast and slow fiber             | 10/21092  | 4.00E-02 | 4.20E-01 | 0.403462799 | Myh7                       | 1 |
| GO:0016264 | gap junction assembly                              | 10/21092  | 4.00E-02 | 4.20E-01 | 0.403462799 | Agt                        | 1 |
| GO:0030049 | muscle filament sliding                            | 10/21092  | 4.00E-02 | 4.20E-01 | 0.403462799 | Myh7                       | 1 |
| GO:0030854 | positive regulation of granulocyte differentiation | 10/21092  | 4.00E-02 | 4.20E-01 | 0.403462799 | Tesc                       | 1 |
| GO:0031282 | regulation of guanylate cyclase activity           | 10/21092  | 4.00E-02 | 4.20E-01 | 0.403462799 | Guca1b                     | 1 |
| GO:0031943 | regulation of glucocorticoid metabolic process     | 10/21092  | 4.00E-02 | 4.20E-01 | 0.403462799 | Bmp5                       | 1 |
| GO:0032342 | aldosterone biosynthetic process                   | 10/21092  | 4.00E-02 | 4.20E-01 | 0.403462799 | Bmp5                       | 1 |
| GO:0043562 | cellular response to nitrogen levels               | 10/21092  | 4.00E-02 | 4.20E-01 | 0.403462799 | Nprl2                      | 1 |
| GO:0048149 | behavioral response to ethanol                     | 10/21092  | 4.00E-02 | 4.20E-01 | 0.403462799 | Adh1                       | 1 |
| GO:0060710 | chorio-allantoic fusion                            | 10/21092  | 4.00E-02 | 4.20E-01 | 0.403462799 | Bmp5                       | 1 |
| GO:0070142 | synaptic vesicle budding                           | 10/21092  | 4.00E-02 | 4.20E-01 | 0.403462799 | Snap91                     | 1 |
| GO:0070257 | positive regulation of mucus secretion             | 10/21092  | 4.00E-02 | 4.20E-01 | 0.403462799 | P2ry2                      | 1 |
| GO:0070278 | extracellular matrix constituent secretion         | 10/21092  | 4.00E-02 | 4.20E-01 | 0.403462799 | Agt                        | 1 |
| GO:1902023 | L-arginine transport                               | 10/21092  | 4.00E-02 | 4.20E-01 | 0.403462799 | Agt                        | 1 |
| GO:2000807 | regulation of synaptic vesicle clustering          | 10/21092  | 4.00E-02 | 4.20E-01 | 0.403462799 | Snap91                     | 1 |
| GO:0006942 | regulation of striated muscle contraction          | 79/21092  | 4.14E-02 | 4.20E-01 | 0.403462799 | Myh7/Scn10a                | 2 |
| GO:0007269 | neurotransmitter secretion                         | 190/21092 | 4.27E-02 | 4.20E-01 | 0.403462799 | Snap91/Mctp1/P2ry2         | 3 |

|            |                                                        |           |          |          |             |                    |   |
|------------|--------------------------------------------------------|-----------|----------|----------|-------------|--------------------|---|
| GO:0099643 | signal release from synapse                            | 190/21092 | 4.27E-02 | 4.20E-01 | 0.403462799 | Snap91/Mctp1/P2ry2 | 3 |
| GO:1901888 | regulation of cell junction assembly                   | 81/21092  | 4.33E-02 | 4.20E-01 | 0.403462799 | Limch1/Agt         | 2 |
| GO:0006012 | galactose metabolic process                            | 11/21092  | 4.40E-02 | 4.20E-01 | 0.403462799 | Glb1               | 1 |
| GO:0006266 | DNA ligation                                           | 11/21092  | 4.40E-02 | 4.20E-01 | 0.403462799 | Parp3              | 1 |
| GO:0006705 | mineralocorticoid biosynthetic process                 | 11/21092  | 4.40E-02 | 4.20E-01 | 0.403462799 | Bmp5               | 1 |
| GO:0006957 | complement activation, alternative pathway             | 11/21092  | 4.40E-02 | 4.20E-01 | 0.403462799 | Cfd                | 1 |
| GO:0007128 | meiotic prophase I                                     | 11/21092  | 4.40E-02 | 4.20E-01 | 0.403462799 | Mlh1               | 1 |
| GO:0010872 | regulation of cholesterol esterification               | 11/21092  | 4.40E-02 | 4.20E-01 | 0.403462799 | Agt                | 1 |
| GO:0010958 | regulation of amino acid import across plasma membrane | 11/21092  | 4.40E-02 | 4.20E-01 | 0.403462799 | Agt                | 1 |
| GO:0014824 | artery smooth muscle contraction                       | 11/21092  | 4.40E-02 | 4.20E-01 | 0.403462799 | Agt                | 1 |
| GO:0019511 | peptidyl-proline hydroxylation                         | 11/21092  | 4.40E-02 | 4.20E-01 | 0.403462799 | Crtap              | 1 |
| GO:0032341 | aldosterone metabolic process                          | 11/21092  | 4.40E-02 | 4.20E-01 | 0.403462799 | Bmp5               | 1 |
| GO:0051324 | prophase                                               | 11/21092  | 4.40E-02 | 4.20E-01 | 0.403462799 | Mlh1               | 1 |
| GO:0060405 | regulation of penile erection                          | 11/21092  | 4.40E-02 | 4.20E-01 | 0.403462799 | P2ry2              | 1 |
| GO:0060586 | multicellular organismal iron ion homeostasis          | 11/21092  | 4.40E-02 | 4.20E-01 | 0.403462799 | Hfe                | 1 |
| GO:0086016 | AV node cell action potential                          | 11/21092  | 4.40E-02 | 4.20E-01 | 0.403462799 | Scn10a             | 1 |
| GO:0086027 | AV node cell to bundle of His cell signaling           | 11/21092  | 4.40E-02 | 4.20E-01 | 0.403462799 | Scn10a             | 1 |
| GO:0097084 | vascular smooth muscle cell development                | 11/21092  | 4.40E-02 | 4.20E-01 | 0.403462799 | Comp               | 1 |
| GO:1903867 | extraembryonic membrane development                    | 11/21092  | 4.40E-02 | 4.20E-01 | 0.403462799 | Bmp5               | 1 |
| GO:0055001 | muscle cell development                                | 195/21092 | 4.56E-02 | 4.20E-01 | 0.403462799 | Comp/Lmod2/Agt     | 3 |
| GO:0014910 | regulation of smooth muscle cell migration             | 85/21092  | 4.72E-02 | 4.20E-01 | 0.403462799 | Agt/P2ry2          | 2 |
| GO:0000279 | M phase                                                | 12/21092  | 4.79E-02 | 4.20E-01 | 0.403462799 | Mlh1               | 1 |
| GO:0000963 | mitochondrial RNA processing                           | 12/21092  | 4.79E-02 | 4.20E-01 | 0.403462799 | Mto1               | 1 |
| GO:0001542 | ovulation from ovarian follicle                        | 12/21092  | 4.79E-02 | 4.20E-01 | 0.403462799 | Agt                | 1 |
| GO:0002016 | regulation of blood volume by renin-angiotensin        | 12/21092  | 4.79E-02 | 4.20E-01 | 0.403462799 | Agt                | 1 |
| GO:0006098 | pentose-phosphate shunt                                | 12/21092  | 4.79E-02 | 4.20E-01 | 0.403462799 | Tkt                | 1 |

|            |                                                             |          |          |          |             |         |   |
|------------|-------------------------------------------------------------|----------|----------|----------|-------------|---------|---|
| GO:0008212 | mineralocorticoid metabolic process                         | 12/21092 | 4.79E-02 | 4.20E-01 | 0.403462799 | Bmp5    | 1 |
| GO:0015809 | arginine transport                                          | 12/21092 | 4.79E-02 | 4.20E-01 | 0.403462799 | Agt     | 1 |
| GO:0030432 | peristalsis                                                 | 12/21092 | 4.79E-02 | 4.20E-01 | 0.403462799 | Agt     | 1 |
| GO:0032308 | positive regulation of prostaglandin secretion              | 12/21092 | 4.79E-02 | 4.20E-01 | 0.403462799 | P2ry2   | 1 |
| GO:0032353 | negative regulation of hormone biosynthetic process         | 12/21092 | 4.79E-02 | 4.20E-01 | 0.403462799 | Bmp5    | 1 |
| GO:0033275 | actin-myosin filament sliding                               | 12/21092 | 4.79E-02 | 4.20E-01 | 0.403462799 | Myh7    | 1 |
| GO:0034309 | primary alcohol biosynthetic process                        | 12/21092 | 4.79E-02 | 4.20E-01 | 0.403462799 | Bmp5    | 1 |
| GO:0042271 | susceptibility to natural killer cell mediated cytotoxicity | 12/21092 | 4.79E-02 | 4.20E-01 | 0.403462799 | Hfe     | 1 |
| GO:0048143 | astrocyte activation                                        | 12/21092 | 4.79E-02 | 4.20E-01 | 0.403462799 | Agt     | 1 |
| GO:0070471 | uterine smooth muscle contraction                           | 12/21092 | 4.79E-02 | 4.20E-01 | 0.403462799 | Agt     | 1 |
| GO:0071281 | cellular response to iron ion                               | 12/21092 | 4.79E-02 | 4.20E-01 | 0.403462799 | Hfe     | 1 |
| GO:0071468 | cellular response to acidic pH                              | 12/21092 | 4.79E-02 | 4.20E-01 | 0.403462799 | Slc38a3 | 1 |
| GO:0098762 | meiotic cell cycle phase                                    | 12/21092 | 4.79E-02 | 4.20E-01 | 0.403462799 | Mlh1    | 1 |
| GO:0098764 | meiosis I cell cycle phase                                  | 12/21092 | 4.79E-02 | 4.20E-01 | 0.403462799 | Mlh1    | 1 |
| GO:1900244 | positive regulation of synaptic vesicle endocytosis         | 12/21092 | 4.79E-02 | 4.20E-01 | 0.403462799 | Snap91  | 1 |
| GO:1902430 | negative regulation of amyloid-beta formation               | 12/21092 | 4.79E-02 | 4.20E-01 | 0.403462799 | Spon1   | 1 |
| GO:1903961 | positive regulation of anion transmembrane transport        | 12/21092 | 4.79E-02 | 4.20E-01 | 0.403462799 | Agt     | 1 |

Supp. Table S7. List of Biological Processes (BP) at FDR 5% - ventricle

| GO ID      | Description                                                          | BgRatio   | pvalue   | p.adjust | qvalue      | geneID                                      | Count |
|------------|----------------------------------------------------------------------|-----------|----------|----------|-------------|---------------------------------------------|-------|
| GO:0021826 | substrate-independent telencephalic tangential migration             | 10/21092  | 2.55E-04 | 1.52E-01 | 0.120425014 | Drd2/Nrg1                                   | 2     |
| GO:0021843 | substrate-independent telencephalic tangential interneuron migration | 10/21092  | 2.55E-04 | 1.52E-01 | 0.120425014 | Drd2/Nrg1                                   | 2     |
| GO:1901386 | negative regulation of voltage-gated calcium channel activity        | 15/21092  | 5.90E-04 | 1.52E-01 | 0.120425014 | Gnb5/Drd2                                   | 2     |
| GO:0014706 | striated muscle tissue development                                   | 441/21092 | 6.56E-04 | 1.52E-01 | 0.120425014 | Plagl1/Tbx18/Ep<br>hb1/Ripor2/Nrg<br>1/Ryr1 | 6     |

|            |                                                                       |           |          |          |             |                                     |   |
|------------|-----------------------------------------------------------------------|-----------|----------|----------|-------------|-------------------------------------|---|
| GO:0003161 | cardiac conduction system development                                 | 16/21092  | 6.73E-04 | 1.52E-01 | 0.120425014 | Tbx18/Nrg1                          | 2 |
| GO:0007409 | axonogenesis                                                          | 451/21092 | 7.38E-04 | 1.52E-01 | 0.120425014 | Snap91/Ntn1/Drd2/Ephb1/Adcy1/Nrg1   | 6 |
| GO:0060537 | muscle tissue development                                             | 462/21092 | 8.36E-04 | 1.52E-01 | 0.120425014 | Plagl1/Tbx18/Ephb1/Ripor2/Nrg1/Ryr1 | 6 |
| GO:0061564 | axon development                                                      | 486/21092 | 1.09E-03 | 1.55E-01 | 0.122484614 | Snap91/Ntn1/Drd2/Ephb1/Adcy1/Nrg1   | 6 |
| GO:0007519 | skeletal muscle tissue development                                    | 197/21092 | 1.31E-03 | 1.55E-01 | 0.122484614 | Plagl1/Ephb1/Ripor2/Ryr1            | 4 |
| GO:0071467 | cellular response to pH                                               | 23/21092  | 1.40E-03 | 1.55E-01 | 0.122484614 | Slc38a3/Hyal1                       | 2 |
| GO:0060538 | skeletal muscle organ development                                     | 206/21092 | 1.54E-03 | 1.55E-01 | 0.122484614 | Plagl1/Ephb1/Ripor2/Ryr1            | 4 |
| GO:0050772 | positive regulation of axonogenesis                                   | 98/21092  | 1.72E-03 | 1.55E-01 | 0.122484614 | Snap91/Ntn1/Nrg1                    | 3 |
| GO:0043171 | peptide catabolic process                                             | 26/21092  | 1.80E-03 | 1.55E-01 | 0.122484614 | Ctsh/Chac1                          | 2 |
| GO:1901020 | negative regulation of calcium ion transmembrane transporter activity | 26/21092  | 1.80E-03 | 1.55E-01 | 0.122484614 | Gnb5/Drd2                           | 2 |
| GO:0072522 | purine-containing compound biosynthetic process                       | 227/21092 | 2.20E-03 | 1.55E-01 | 0.122484614 | Guca1b/Adcy1/Nt5e/Shmt1             | 4 |
| GO:0042692 | muscle cell differentiation                                           | 383/21092 | 2.28E-03 | 1.55E-01 | 0.122484614 | Tbx18/Ripor2/Nrg1/Ryr1/Tnnt2        | 5 |
| GO:0006506 | GPI anchor biosynthetic process                                       | 31/21092  | 2.55E-03 | 1.55E-01 | 0.122484614 | Pgap2/Pigf                          | 2 |
| GO:0042472 | inner ear morphogenesis                                               | 113/21092 | 2.59E-03 | 1.55E-01 | 0.122484614 | Ntn1/Tbx18/Ripor2                   | 3 |
| GO:0001964 | startle response                                                      | 32/21092  | 2.71E-03 | 1.55E-01 | 0.122484614 | Drd2/Nrg1                           | 2 |
| GO:0006505 | GPI anchor metabolic process                                          | 32/21092  | 2.71E-03 | 1.55E-01 | 0.122484614 | Pgap2/Pigf                          | 2 |
| GO:1903170 | negative regulation of calcium ion transmembrane transport            | 35/21092  | 3.24E-03 | 1.55E-01 | 0.122484614 | Gnb5/Drd2                           | 2 |
| GO:0007517 | muscle organ development                                              | 420/21092 | 3.38E-03 | 1.55E-01 | 0.122484614 | Plagl1/Ephb1/Ripor2/Nrg1/Ryr1       | 5 |
| GO:0050807 | regulation of synapse organization                                    | 259/21092 | 3.53E-03 | 1.55E-01 | 0.122484614 | Snap91/Ntn1/Drd2/Ephb1              | 4 |
| GO:1901385 | regulation of voltage-gated calcium channel activity                  | 37/21092  | 3.62E-03 | 1.55E-01 | 0.122484614 | Gnb5/Drd2                           | 2 |
| GO:0050808 | synapse organization                                                  | 427/21092 | 3.63E-03 | 1.55E-01 | 0.122484614 | Snap91/Ntn1/Drd2/Ephb1/Nrg1         | 5 |
| GO:0007616 | long-term memory                                                      | 38/21092  | 3.81E-03 | 1.55E-01 | 0.122484614 | Drd2/Adcy1                          | 2 |

|            |                                                |           |          |          |             |                                |   |
|------------|------------------------------------------------|-----------|----------|----------|-------------|--------------------------------|---|
| GO:0048741 | skeletal muscle fiber development              | 38/21092  | 3.81E-03 | 1.55E-01 | 0.122484614 | Ripor2/Ryr1                    | 2 |
| GO:0060236 | regulation of mitotic spindle organization     | 38/21092  | 3.81E-03 | 1.55E-01 | 0.122484614 | Parp3/Ripor2                   | 2 |
| GO:0050803 | regulation of synapse structure or activity    | 266/21092 | 3.88E-03 | 1.55E-01 | 0.122484614 | Snap91/Ntn1/Drd2/Ephb1         | 4 |
| GO:0009268 | response to pH                                 | 40/21092  | 4.22E-03 | 1.55E-01 | 0.122484614 | Slc38a3/Hyal1                  | 2 |
| GO:0042471 | ear morphogenesis                              | 135/21092 | 4.27E-03 | 1.55E-01 | 0.122484614 | Ntn1/Tbx18/Ripor2              | 3 |
| GO:0031279 | regulation of cyclase activity                 | 41/21092  | 4.43E-03 | 1.55E-01 | 0.122484614 | Guca1b/Drd2                    | 2 |
| GO:2001258 | negative regulation of cation channel activity | 41/21092  | 4.43E-03 | 1.55E-01 | 0.122484614 | Gnb5/Drd2                      | 2 |
| GO:0071496 | cellular response to external stimulus         | 277/21092 | 4.48E-03 | 1.55E-01 | 0.122484614 | Nprl2/Slc38a3/Ripor2/Ryr1      | 4 |
| GO:0006024 | glycosaminoglycan biosynthetic process         | 42/21092  | 4.64E-03 | 1.55E-01 | 0.122484614 | Pxylp1/Hyal1                   | 2 |
| GO:0014904 | myotube cell development                       | 42/21092  | 4.64E-03 | 1.55E-01 | 0.122484614 | Ripor2/Ryr1                    | 2 |
| GO:0090224 | regulation of spindle organization             | 42/21092  | 4.64E-03 | 1.55E-01 | 0.122484614 | Parp3/Ripor2                   | 2 |
| GO:0006936 | muscle contraction                             | 281/21092 | 4.71E-03 | 1.55E-01 | 0.122484614 | Drd2/Ryr1/Scn10a/Tnnt2         | 4 |
| GO:0007212 | dopamine receptor signaling pathway            | 43/21092  | 4.86E-03 | 1.55E-01 | 0.122484614 | Gnb5/Drd2                      | 2 |
| GO:0051339 | regulation of lyase activity                   | 43/21092  | 4.86E-03 | 1.55E-01 | 0.122484614 | Guca1b/Drd2                    | 2 |
| GO:0098693 | regulation of synaptic vesicle cycle           | 147/21092 | 5.41E-03 | 1.66E-01 | 0.131229692 | Snap91/Drd2/Adcy1              | 3 |
| GO:0006937 | regulation of muscle contraction               | 148/21092 | 5.51E-03 | 1.66E-01 | 0.131229692 | Ryr1/Scn10a/Tnnt1              | 3 |
| GO:0090407 | organophosphate biosynthetic process           | 474/21092 | 5.64E-03 | 1.66E-01 | 0.131229692 | Guca1b/Pgap2/Adcy1/Shmt1/Pi gf | 5 |
| GO:0090596 | sensory organ morphogenesis                    | 297/21092 | 5.73E-03 | 1.66E-01 | 0.131229692 | Ntn1/Tbx18/Ephb1/Ripor2        | 4 |
| GO:0051146 | striated muscle cell differentiation           | 302/21092 | 6.07E-03 | 1.72E-01 | 0.136016787 | Ripor2/Nrg1/Ryr1/Tnnt2         | 4 |
| GO:0045927 | positive regulation of growth                  | 308/21092 | 6.50E-03 | 1.80E-01 | 0.141909734 | Ntn1/Drd2/Nrg1/Hyal1           | 4 |
| GO:0051954 | positive regulation of amine transport         | 51/21092  | 6.78E-03 | 1.80E-01 | 0.141909734 | Slc38a3/Drd2                   | 2 |
| GO:0048562 | embryonic organ morphogenesis                  | 315/21092 | 7.03E-03 | 1.80E-01 | 0.141909734 | Ntn1/Tbx18/Ripor2/Hyal1        | 4 |
| GO:0006023 | aminoglycan biosynthetic process               | 52/21092  | 7.04E-03 | 1.80E-01 | 0.141909734 | Pxylp1/Hyal1                   | 2 |
| GO:0045773 | positive regulation of axon extension          | 52/21092  | 7.04E-03 | 1.80E-01 | 0.141909734 | Ntn1/Nrg1                      | 2 |

|            |                                                                       |           |          |          |             |                         |   |
|------------|-----------------------------------------------------------------------|-----------|----------|----------|-------------|-------------------------|---|
| GO:0007416 | synapse assembly                                                      | 169/21092 | 7.94E-03 | 1.94E-01 | 0.153083885 | Ntn1/Ephb1/Nrg1         | 3 |
| GO:0009247 | glycolipid biosynthetic process                                       | 56/21092  | 8.12E-03 | 1.94E-01 | 0.153083885 | Pgap2/Pigf              | 2 |
| GO:0006661 | phosphatidylinositol biosynthetic process                             | 59/21092  | 8.98E-03 | 1.94E-01 | 0.153083885 | Pgap2/Pigf              | 2 |
| GO:0010770 | positive regulation of cell morphogenesis involved in differentiation | 177/21092 | 9.01E-03 | 1.94E-01 | 0.153083885 | Snap91/Ntn1/Nrg1        | 3 |
| GO:0001764 | neuron migration                                                      | 181/21092 | 9.57E-03 | 1.94E-01 | 0.153083885 | Ntn1/Drd2/Nrg1          | 3 |
| GO:0048489 | synaptic vesicle transport                                            | 181/21092 | 9.57E-03 | 1.94E-01 | 0.153083885 | Snap91/Drd2/Ancy1       | 3 |
| GO:0055002 | striated muscle cell development                                      | 181/21092 | 9.57E-03 | 1.94E-01 | 0.153083885 | Ripor2/Ryr1/Tnnt1       | 3 |
| GO:0097480 | establishment of synaptic vesicle localization                        | 181/21092 | 9.57E-03 | 1.94E-01 | 0.153083885 | Snap91/Drd2/Ancy1       | 3 |
| GO:0051926 | negative regulation of calcium ion transport                          | 61/21092  | 9.58E-03 | 1.94E-01 | 0.153083885 | Gnb5/Drd2               | 2 |
| GO:0009988 | cell-cell recognition                                                 | 62/21092  | 9.88E-03 | 1.94E-01 | 0.153083885 | Ephb1/Hspa1l            | 2 |
| GO:0031669 | cellular response to nutrient levels                                  | 185/21092 | 1.02E-02 | 1.94E-01 | 0.153083885 | Nprl2/Slc38a3/Ryr1      | 3 |
| GO:0042440 | pigment metabolic process                                             | 63/21092  | 1.02E-02 | 1.94E-01 | 0.153083885 | Cyb5r4/Shmt1            | 2 |
| GO:0031638 | zymogen activation                                                    | 64/21092  | 1.05E-02 | 1.94E-01 | 0.153083885 | Ctsh/Cideb              | 2 |
| GO:0007269 | neurotransmitter secretion                                            | 190/21092 | 1.09E-02 | 1.94E-01 | 0.153083885 | Snap91/Drd2/Ancy1       | 3 |
| GO:0099643 | signal release from synapse                                           | 190/21092 | 1.09E-02 | 1.94E-01 | 0.153083885 | Snap91/Drd2/Ancy1       | 3 |
| GO:0032413 | negative regulation of ion transmembrane transporter activity         | 66/21092  | 1.11E-02 | 1.94E-01 | 0.153083885 | Gnb5/Drd2               | 2 |
| GO:0097479 | synaptic vesicle localization                                         | 192/21092 | 1.12E-02 | 1.94E-01 | 0.153083885 | Snap91/Drd2/Ancy1       | 3 |
| GO:0030307 | positive regulation of cell growth                                    | 195/21092 | 1.17E-02 | 1.94E-01 | 0.153083885 | Ntn1/Nrg1/Hyal1         | 3 |
| GO:0055001 | muscle cell development                                               | 195/21092 | 1.17E-02 | 1.94E-01 | 0.153083885 | Ripor2/Ryr1/Tnnt1       | 3 |
| GO:0022029 | telencephalon cell migration                                          | 70/21092  | 1.25E-02 | 1.94E-01 | 0.153083885 | Drd2/Nrg1               | 2 |
| GO:0001505 | regulation of neurotransmitter levels                                 | 376/21092 | 1.29E-02 | 1.94E-01 | 0.153083885 | Snap91/Drd2/Ancy1/Shmt1 | 4 |
| GO:0050770 | regulation of axonogenesis                                            | 202/21092 | 1.29E-02 | 1.94E-01 | 0.153083885 | Snap91/Ntn1/Nrg1        | 3 |
| GO:0010822 | positive regulation of mitochondrion organization                     | 72/21092  | 1.32E-02 | 1.94E-01 | 0.153083885 | Cideb/Hspa1l            | 2 |
| GO:0021885 | forebrain cell migration                                              | 73/21092  | 1.35E-02 | 1.94E-01 | 0.153083885 | Drd2/Nrg1               | 2 |



|            |                                                              |           |          |          |             |                        |   |
|------------|--------------------------------------------------------------|-----------|----------|----------|-------------|------------------------|---|
| GO:0048839 | inner ear development                                        | 206/21092 | 1.36E-02 | 1.94E-01 | 0.153083885 | Ntn1/Tbx18/Ripor2      | 3 |
| GO:0003012 | muscle system process                                        | 383/21092 | 1.37E-02 | 1.94E-01 | 0.153083885 | Drd2/Ryr1/Scn10a/Tnnt2 | 4 |
| GO:0060047 | heart contraction                                            | 207/21092 | 1.37E-02 | 1.94E-01 | 0.153083885 | Drd2/Scn10a/Tnnt1      | 3 |
| GO:0051155 | positive regulation of striated muscle cell differentiation  | 74/21092  | 1.39E-02 | 1.94E-01 | 0.153083885 | Ripor2/Nrg1            | 2 |
| GO:0007163 | establishment or maintenance of cell polarity                | 208/21092 | 1.39E-02 | 1.94E-01 | 0.153083885 | Snap91/Ephb1/Ripor2    | 3 |
| GO:0032410 | negative regulation of transporter activity                  | 75/21092  | 1.42E-02 | 1.94E-01 | 0.153083885 | Gnb5/Drd2              | 2 |
| GO:0048639 | positive regulation of developmental growth                  | 210/21092 | 1.43E-02 | 1.94E-01 | 0.153083885 | Ntn1/Drd2/Nrg1         | 3 |
| GO:0048747 | muscle fiber development                                     | 76/21092  | 1.46E-02 | 1.94E-01 | 0.153083885 | Ripor2/Ryr1            | 2 |
| GO:0006814 | sodium ion transport                                         | 212/21092 | 1.46E-02 | 1.94E-01 | 0.153083885 | Slc38a3/Drd2/Scn10a    | 3 |
| GO:0031668 | cellular response to extracellular stimulus                  | 212/21092 | 1.46E-02 | 1.94E-01 | 0.153083885 | Npri2/Slc38a3/Ryr1     | 3 |
| GO:0003015 | heart process                                                | 215/21092 | 1.52E-02 | 1.94E-01 | 0.153083885 | Drd2/Scn10a/Tnnt1      | 3 |
| GO:0006664 | glycolipid metabolic process                                 | 79/21092  | 1.57E-02 | 1.94E-01 | 0.153083885 | Pgap2/Pigf             | 2 |
| GO:0043279 | response to alkaloid                                         | 79/21092  | 1.57E-02 | 1.94E-01 | 0.153083885 | Drd2/Ryr1              | 2 |
| GO:1901019 | regulation of calcium ion transmembrane transporter activity | 79/21092  | 1.57E-02 | 1.94E-01 | 0.153083885 | Gnb5/Drd2              | 2 |
| GO:0030073 | insulin secretion                                            | 218/21092 | 1.58E-02 | 1.94E-01 | 0.153083885 | Hmgn3/Drd2/Cyb5r4      | 3 |
| GO:1903509 | liposaccharide metabolic process                             | 80/21092  | 1.61E-02 | 1.94E-01 | 0.153083885 | Pgap2/Pigf             | 2 |
| GO:0030203 | glycosaminoglycan metabolic process                          | 81/21092  | 1.64E-02 | 1.94E-01 | 0.153083885 | Pxylp1/Hyal1           | 2 |
| GO:1904063 | negative regulation of cation transmembrane transport        | 82/21092  | 1.68E-02 | 1.94E-01 | 0.153083885 | Gnb5/Drd2              | 2 |
| GO:0099504 | synaptic vesicle cycle                                       | 228/21092 | 1.77E-02 | 1.94E-01 | 0.153083885 | Snap91/Drd2/Adcy1      | 3 |
| GO:0016485 | protein processing                                           | 229/21092 | 1.79E-02 | 1.94E-01 | 0.153083885 | Ctsh/Cideb/Chac1       | 3 |
| GO:0090257 | regulation of muscle system process                          | 232/21092 | 1.86E-02 | 1.94E-01 | 0.153083885 | Ryr1/Scn10a/Tnnt1      | 3 |
| GO:0021954 | central nervous system neuron development                    | 87/21092  | 1.88E-02 | 1.94E-01 | 0.153083885 | Drd2/Ephb1             | 2 |
| GO:0043583 | ear development                                              | 236/21092 | 1.94E-02 | 1.94E-01 | 0.153083885 | Ntn1/Tbx18/Ripor2      | 3 |
| GO:0006497 | protein lipidation                                           | 89/21092  | 1.96E-02 | 1.94E-01 | 0.153083885 | Pgap2/Pigf             | 2 |

|            |                                                                               |           |          |          |             |                         |   |
|------------|-------------------------------------------------------------------------------|-----------|----------|----------|-------------|-------------------------|---|
| GO:0035914 | skeletal muscle cell differentiation                                          | 89/21092  | 1.96E-02 | 1.94E-01 | 0.153083885 | Plagl1/Ephb1            | 2 |
| GO:0051149 | positive regulation of muscle cell differentiation                            | 89/21092  | 1.96E-02 | 1.94E-01 | 0.153083885 | Ripor2/Nrg1             | 2 |
| GO:0019932 | second-messenger-mediated signaling                                           | 430/21092 | 2.00E-02 | 1.94E-01 | 0.153083885 | Drd2/Ackr4/Adcy1/Nrg1   | 4 |
| GO:0002027 | regulation of heart rate                                                      | 91/21092  | 2.05E-02 | 1.94E-01 | 0.153083885 | Drd2/Scn10a             | 2 |
| GO:0090068 | positive regulation of cell cycle process                                     | 246/21092 | 2.16E-02 | 1.94E-01 | 0.153083885 | Drd2/Ripor2/Hyal1       | 3 |
| GO:0042158 | lipoprotein biosynthetic process                                              | 94/21092  | 2.17E-02 | 1.94E-01 | 0.153083885 | Pgap2/Pigf              | 2 |
| GO:0099003 | vesicle-mediated transport in synapse                                         | 249/21092 | 2.23E-02 | 1.94E-01 | 0.153083885 | Snap91/Drd2/Adcy1       | 3 |
| GO:0034766 | negative regulation of ion transmembrane transport                            | 98/21092  | 2.35E-02 | 1.94E-01 | 0.153083885 | Gnb5/Drd2               | 2 |
| GO:0006995 | cellular response to nitrogen starvation                                      | 10/21092  | 2.39E-02 | 1.94E-01 | 0.153083885 | Nprl2                   | 1 |
| GO:0007270 | neuron-neuron synaptic transmission                                           | 10/21092  | 2.39E-02 | 1.94E-01 | 0.153083885 | Drd2                    | 1 |
| GO:0009129 | pyrimidine nucleoside monophosphate metabolic process                         | 10/21092  | 2.39E-02 | 1.94E-01 | 0.153083885 | Shmt1                   | 1 |
| GO:0009221 | pyrimidine deoxyribonucleotide biosynthetic process                           | 10/21092  | 2.39E-02 | 1.94E-01 | 0.153083885 | Shmt1                   | 1 |
| GO:0014883 | transition between fast and slow fiber                                        | 10/21092  | 2.39E-02 | 1.94E-01 | 0.153083885 | Tnnt2                   | 1 |
| GO:0021554 | optic nerve development                                                       | 10/21092  | 2.39E-02 | 1.94E-01 | 0.153083885 | Ephb1                   | 1 |
| GO:0031282 | regulation of guanylate cyclase activity                                      | 10/21092  | 2.39E-02 | 1.94E-01 | 0.153083885 | Guca1b                  | 1 |
| GO:0043562 | cellular response to nitrogen levels                                          | 10/21092  | 2.39E-02 | 1.94E-01 | 0.153083885 | Nprl2                   | 1 |
| GO:0046085 | adenosine metabolic process                                                   | 10/21092  | 2.39E-02 | 1.94E-01 | 0.153083885 | Nt5e                    | 1 |
| GO:0048149 | behavioral response to ethanol                                                | 10/21092  | 2.39E-02 | 1.94E-01 | 0.153083885 | Drd2                    | 1 |
| GO:0051823 | regulation of synapse structural plasticity                                   | 10/21092  | 2.39E-02 | 1.94E-01 | 0.153083885 | Drd2                    | 1 |
| GO:0070142 | synaptic vesicle budding                                                      | 10/21092  | 2.39E-02 | 1.94E-01 | 0.153083885 | Snap91                  | 1 |
| GO:1903749 | positive regulation of establishment of protein localization to mitochondrion | 10/21092  | 2.39E-02 | 1.94E-01 | 0.153083885 | Hspa1l                  | 1 |
| GO:1905097 | regulation of guanyl-nucleotide exchange factor activity                      | 10/21092  | 2.39E-02 | 1.94E-01 | 0.153083885 | Ripor2                  | 1 |
| GO:2000402 | negative regulation of lymphocyte migration                                   | 10/21092  | 2.39E-02 | 1.94E-01 | 0.153083885 | Ripor2                  | 1 |
| GO:2000807 | regulation of synaptic vesicle clustering                                     | 10/21092  | 2.39E-02 | 1.94E-01 | 0.153083885 | Snap91                  | 1 |
| GO:0006022 | aminoglycan metabolic process                                                 | 99/21092  | 2.40E-02 | 1.94E-01 | 0.153083885 | Pxylp1/Hyal1            | 2 |
| GO:0031346 | positive regulation of cell projection organization                           | 462/21092 | 2.53E-02 | 1.94E-01 | 0.153083885 | Snap91/Ntn1/Ripor2/Nrg1 | 4 |

|            |                                                             |           |          |          |             |                         |   |
|------------|-------------------------------------------------------------|-----------|----------|----------|-------------|-------------------------|---|
| GO:0030336 | negative regulation of cell migration                       | 263/21092 | 2.57E-02 | 1.94E-01 | 0.153083885 | Drd2/Ripor2/Nrg1        | 3 |
| GO:0051650 | establishment of vesicle localization                       | 265/21092 | 2.62E-02 | 1.94E-01 | 0.153083885 | Snap91/Drd2/Adcy1       | 3 |
| GO:0048259 | regulation of receptor-mediated endocytosis                 | 104/21092 | 2.62E-02 | 1.94E-01 | 0.153083885 | Snap91/Drd2             | 2 |
| GO:2000300 | regulation of synaptic vesicle exocytosis                   | 104/21092 | 2.62E-02 | 1.94E-01 | 0.153083885 | Drd2/Adcy1              | 2 |
| GO:0006012 | galactose metabolic process                                 | 11/21092  | 2.63E-02 | 1.94E-01 | 0.153083885 | Glb1                    | 1 |
| GO:0006171 | cAMP biosynthetic process                                   | 11/21092  | 2.63E-02 | 1.94E-01 | 0.153083885 | Adcy1                   | 1 |
| GO:0006266 | DNA ligation                                                | 11/21092  | 2.63E-02 | 1.94E-01 | 0.153083885 | Parp3                   | 1 |
| GO:0009125 | nucleoside monophosphate catabolic process                  | 11/21092  | 2.63E-02 | 1.94E-01 | 0.153083885 | Nt5e                    | 1 |
| GO:0021892 | cerebral cortex GABAergic interneuron differentiation       | 11/21092  | 2.63E-02 | 1.94E-01 | 0.153083885 | Drd2                    | 1 |
| GO:0034776 | response to histamine                                       | 11/21092  | 2.63E-02 | 1.94E-01 | 0.153083885 | Drd2                    | 1 |
| GO:0035999 | tetrahydrofolate interconversion                            | 11/21092  | 2.63E-02 | 1.94E-01 | 0.153083885 | Shmt1                   | 1 |
| GO:0051967 | negative regulation of synaptic transmission, glutamatergic | 11/21092  | 2.63E-02 | 1.94E-01 | 0.153083885 | Drd2                    | 1 |
| GO:0060159 | regulation of dopamine receptor signaling pathway           | 11/21092  | 2.63E-02 | 1.94E-01 | 0.153083885 | Drd2                    | 1 |
| GO:0060600 | dichotomous subdivision of an epithelial terminal unit      | 11/21092  | 2.63E-02 | 1.94E-01 | 0.153083885 | Ctsh                    | 1 |
| GO:0086016 | AV node cell action potential                               | 11/21092  | 2.63E-02 | 1.94E-01 | 0.153083885 | Scn10a                  | 1 |
| GO:0086027 | AV node cell to bundle of His cell signaling                | 11/21092  | 2.63E-02 | 1.94E-01 | 0.153083885 | Scn10a                  | 1 |
| GO:0072521 | purine-containing compound metabolic process                | 469/21092 | 2.65E-02 | 1.94E-01 | 0.153083885 | Guca1b/Adcy1/Nt5e/Shmt1 | 4 |
| GO:0009165 | nucleotide biosynthetic process                             | 267/21092 | 2.67E-02 | 1.94E-01 | 0.153083885 | Guca1b/Adcy1/Shmt1      | 3 |
| GO:0006986 | response to unfolded protein                                | 106/21092 | 2.72E-02 | 1.94E-01 | 0.153083885 | Hspa1/Chac1             | 2 |
| GO:0046474 | glycerophospholipid biosynthetic process                    | 106/21092 | 2.72E-02 | 1.94E-01 | 0.153083885 | Pgap2/Pigf              | 2 |
| GO:0042752 | regulation of circadian rhythm                              | 107/21092 | 2.77E-02 | 1.94E-01 | 0.153083885 | Drd2/Adcy1              | 2 |
| GO:0051209 | release of sequestered calcium ion into cytosol             | 107/21092 | 2.77E-02 | 1.94E-01 | 0.153083885 | Drd2/Ryr1               | 2 |
| GO:0030072 | peptide hormone secretion                                   | 271/21092 | 2.78E-02 | 1.94E-01 | 0.153083885 | Hmgn3/Drd2/Cyb5r4       | 3 |
| GO:0070588 | calcium ion transmembrane transport                         | 271/21092 | 2.78E-02 | 1.94E-01 | 0.153083885 | Gnb5/Drd2/Ryr1          | 3 |
| GO:0051656 | establishment of organelle localization                     | 476/21092 | 2.78E-02 | 1.94E-01 | 0.153083885 | Snap91/Ntn1/Drd2/Adcy1  | 4 |

|            |                                                                  |           |          |          |             |                         |   |
|------------|------------------------------------------------------------------|-----------|----------|----------|-------------|-------------------------|---|
| GO:1902803 | regulation of synaptic vesicle transport                         | 108/21092 | 2.81E-02 | 1.94E-01 | 0.153083885 | Drd2/Adcy1              | 2 |
| GO:1901293 | nucleoside phosphate biosynthetic process                        | 274/21092 | 2.86E-02 | 1.94E-01 | 0.153083885 | Guca1b/Adcy1/Shmt1      | 3 |
| GO:0007052 | mitotic spindle organization                                     | 109/21092 | 2.86E-02 | 1.94E-01 | 0.153083885 | Parp3/Ripor2            | 2 |
| GO:0030516 | regulation of axon extension                                     | 109/21092 | 2.86E-02 | 1.94E-01 | 0.153083885 | Ntn1/Nrg1               | 2 |
| GO:0051283 | negative regulation of sequestering of calcium ion               | 109/21092 | 2.86E-02 | 1.94E-01 | 0.153083885 | Drd2/Ryr1               | 2 |
| GO:0000963 | mitochondrial RNA processing                                     | 12/21092  | 2.86E-02 | 1.94E-01 | 0.153083885 | Mto1                    | 1 |
| GO:0007195 | adenylate cyclase-inhibiting dopamine receptor signaling pathway | 12/21092  | 2.86E-02 | 1.94E-01 | 0.153083885 | Drd2                    | 1 |
| GO:0009265 | 2'-deoxyribonucleotide biosynthetic process                      | 12/21092  | 2.86E-02 | 1.94E-01 | 0.153083885 | Shmt1                   | 1 |
| GO:0014842 | regulation of skeletal muscle satellite cell proliferation       | 12/21092  | 2.86E-02 | 1.94E-01 | 0.153083885 | Ephb1                   | 1 |
| GO:0030432 | peristalsis                                                      | 12/21092  | 2.86E-02 | 1.94E-01 | 0.153083885 | Drd2                    | 1 |
| GO:0032488 | Cdc42 protein signal transduction                                | 12/21092  | 2.86E-02 | 1.94E-01 | 0.153083885 | Ntn1                    | 1 |
| GO:0046385 | deoxyribose phosphate biosynthetic process                       | 12/21092  | 2.86E-02 | 1.94E-01 | 0.153083885 | Shmt1                   | 1 |
| GO:0071318 | cellular response to ATP                                         | 12/21092  | 2.86E-02 | 1.94E-01 | 0.153083885 | Ryr1                    | 1 |
| GO:0071468 | cellular response to acidic pH                                   | 12/21092  | 2.86E-02 | 1.94E-01 | 0.153083885 | Slc38a3                 | 1 |
| GO:0090494 | dopamine uptake                                                  | 12/21092  | 2.86E-02 | 1.94E-01 | 0.153083885 | Drd2                    | 1 |
| GO:1900244 | positive regulation of synaptic vesicle endocytosis              | 12/21092  | 2.86E-02 | 1.94E-01 | 0.153083885 | Snap91                  | 1 |
| GO:2000146 | negative regulation of cell motility                             | 277/21092 | 2.94E-02 | 1.94E-01 | 0.153083885 | Drd2/Ripor2/Nrg1        | 3 |
| GO:0051282 | regulation of sequestering of calcium ion                        | 111/21092 | 2.96E-02 | 1.94E-01 | 0.153083885 | Drd2/Ryr1               | 2 |
| GO:0051208 | sequestering of calcium ion                                      | 112/21092 | 3.01E-02 | 1.94E-01 | 0.153083885 | Drd2/Ryr1               | 2 |
| GO:0048568 | embryonic organ development                                      | 490/21092 | 3.05E-02 | 1.94E-01 | 0.153083885 | Ntn1/Tbx18/Ripor2/Hyal1 | 4 |
| GO:0046467 | membrane lipid biosynthetic process                              | 113/21092 | 3.06E-02 | 1.94E-01 | 0.153083885 | Pgap2/Pigf              | 2 |
| GO:0006596 | polyamine biosynthetic process                                   | 13/21092  | 3.10E-02 | 1.94E-01 | 0.153083885 | Sms                     | 1 |
| GO:0009071 | serine family amino acid catabolic process                       | 13/21092  | 3.10E-02 | 1.94E-01 | 0.153083885 | Shmt1                   | 1 |
| GO:0009219 | pyrimidine deoxyribonucleotide metabolic process                 | 13/21092  | 3.10E-02 | 1.94E-01 | 0.153083885 | Shmt1                   | 1 |
| GO:0014841 | skeletal muscle satellite cell proliferation                     | 13/21092  | 3.10E-02 | 1.94E-01 | 0.153083885 | Ephb1                   | 1 |
| GO:0030213 | hyaluronan biosynthetic process                                  | 13/21092  | 3.10E-02 | 1.94E-01 | 0.153083885 | Hyal1                   | 1 |

|            |                                                      |           |          |          |             |                          |   |
|------------|------------------------------------------------------|-----------|----------|----------|-------------|--------------------------|---|
| GO:0031000 | response to caffeine                                 | 13/21092  | 3.10E-02 | 1.94E-01 | 0.153083885 | Ryr1                     | 1 |
| GO:0035810 | positive regulation of urine volume                  | 13/21092  | 3.10E-02 | 1.94E-01 | 0.153083885 | Drd2                     | 1 |
| GO:0036270 | response to diuretic                                 | 13/21092  | 3.10E-02 | 1.94E-01 | 0.153083885 | Ryr1                     | 1 |
| GO:0060124 | positive regulation of growth hormone secretion      | 13/21092  | 3.10E-02 | 1.94E-01 | 0.153083885 | Drd2                     | 1 |
| GO:0060272 | embryonic skeletal joint morphogenesis               | 13/21092  | 3.10E-02 | 1.94E-01 | 0.153083885 | Hyal1                    | 1 |
| GO:0086067 | AV node cell to bundle of His cell communication     | 13/21092  | 3.10E-02 | 1.94E-01 | 0.153083885 | Scn10a                   | 1 |
| GO:0090493 | catecholamine uptake                                 | 13/21092  | 3.10E-02 | 1.94E-01 | 0.153083885 | Drd2                     | 1 |
| GO:0097202 | activation of cysteine-type endopeptidase activity   | 13/21092  | 3.10E-02 | 1.94E-01 | 0.153083885 | Cideb                    | 1 |
| GO:2001223 | negative regulation of neuron migration              | 13/21092  | 3.10E-02 | 1.94E-01 | 0.153083885 | Nrg1                     | 1 |
| GO:0051648 | vesicle localization                                 | 283/21092 | 3.10E-02 | 1.94E-01 | 0.153083885 | Snap91/Drd2/A<br>dcy1    | 3 |
| GO:1903828 | negative regulation of cellular protein localization | 114/21092 | 3.11E-02 | 1.94E-01 | 0.153083885 | Ripor2/Dclk3             | 2 |
| GO:1901136 | carbohydrate derivative catabolic process            | 115/21092 | 3.16E-02 | 1.94E-01 | 0.153083885 | Nt5e/Hyal1               | 2 |
| GO:0051963 | regulation of synapse assembly                       | 117/21092 | 3.26E-02 | 1.94E-01 | 0.153083885 | Ntn1/Ephb1               | 2 |
| GO:0009416 | response to light stimulus                           | 290/21092 | 3.30E-02 | 1.94E-01 | 0.153083885 | Guca1b/Drd2/H<br>yal1    | 3 |
| GO:0071214 | cellular response to abiotic stimulus                | 290/21092 | 3.30E-02 | 1.94E-01 | 0.153083885 | Slc38a3/Ripor2/<br>Hyal1 | 3 |
| GO:0104004 | cellular response to environmental stimulus          | 290/21092 | 3.30E-02 | 1.94E-01 | 0.153083885 | Slc38a3/Ripor2/<br>Hyal1 | 3 |
| GO:0051604 | protein maturation                                   | 291/21092 | 3.33E-02 | 1.94E-01 | 0.153083885 | Ctsh/Cideb/Cha<br>c1     | 3 |
| GO:0001771 | immunological synapse formation                      | 14/21092  | 3.33E-02 | 1.94E-01 | 0.153083885 | Ephb1                    | 1 |
| GO:0006544 | glycine metabolic process                            | 14/21092  | 3.33E-02 | 1.94E-01 | 0.153083885 | Shmt1                    | 1 |
| GO:0007194 | negative regulation of adenylate cyclase activity    | 14/21092  | 3.33E-02 | 1.94E-01 | 0.153083885 | Drd2                     | 1 |
| GO:0015802 | basic amino acid transport                           | 14/21092  | 3.33E-02 | 1.94E-01 | 0.153083885 | Slc38a3                  | 1 |
| GO:0021781 | glial cell fate commitment                           | 14/21092  | 3.33E-02 | 1.94E-01 | 0.153083885 | Nrg1                     | 1 |
| GO:0021984 | adenohypophysis development                          | 14/21092  | 3.33E-02 | 1.94E-01 | 0.153083885 | Drd2                     | 1 |
| GO:0031223 | auditory behavior                                    | 14/21092  | 3.33E-02 | 1.94E-01 | 0.153083885 | Drd2                     | 1 |
| GO:0031987 | locomotion involved in locomotory behavior           | 14/21092  | 3.33E-02 | 1.94E-01 | 0.153083885 | Drd2                     | 1 |
| GO:0035815 | positive regulation of renal sodium excretion        | 14/21092  | 3.33E-02 | 1.94E-01 | 0.153083885 | Drd2                     | 1 |

|            |                                                      |           |          |          |             |                    |   |
|------------|------------------------------------------------------|-----------|----------|----------|-------------|--------------------|---|
| GO:0046033 | AMP metabolic process                                | 14/21092  | 3.33E-02 | 1.94E-01 | 0.153083885 | Nt5e               | 1 |
| GO:0046058 | cAMP metabolic process                               | 14/21092  | 3.33E-02 | 1.94E-01 | 0.153083885 | Adcy1              | 1 |
| GO:0048755 | branching morphogenesis of a nerve                   | 14/21092  | 3.33E-02 | 1.94E-01 | 0.153083885 | Drd2               | 1 |
| GO:0086069 | bundle of His cell to Purkinje myocyte communication | 14/21092  | 3.33E-02 | 1.94E-01 | 0.153083885 | Scn10a             | 1 |
| GO:0097154 | GABAergic neuron differentiation                     | 14/21092  | 3.33E-02 | 1.94E-01 | 0.153083885 | Drd2               | 1 |
| GO:0051952 | regulation of amine transport                        | 119/21092 | 3.36E-02 | 1.94E-01 | 0.153083885 | Slc38a3/Drd2       | 2 |
| GO:0014902 | myotube differentiation                              | 120/21092 | 3.41E-02 | 1.94E-01 | 0.153083885 | Ripor2/Ryr1        | 2 |
| GO:0060996 | dendritic spine development                          | 120/21092 | 3.41E-02 | 1.94E-01 | 0.153083885 | Ephb1/Nrg1         | 2 |
| GO:0042157 | lipoprotein metabolic process                        | 121/21092 | 3.47E-02 | 1.94E-01 | 0.153083885 | Pgap2/Pigf         | 2 |
| GO:0051153 | regulation of striated muscle cell differentiation   | 121/21092 | 3.47E-02 | 1.94E-01 | 0.153083885 | Ripor2/Nrg1        | 2 |
| GO:0060048 | cardiac muscle contraction                           | 121/21092 | 3.47E-02 | 1.94E-01 | 0.153083885 | Scn10a/Tnnt2       | 2 |
| GO:0060326 | cell chemotaxis                                      | 298/21092 | 3.53E-02 | 1.94E-01 | 0.153083885 | Ephb1/Ackr4/Ripor2 | 3 |
| GO:0009263 | deoxyribonucleotide biosynthetic process             | 15/21092  | 3.57E-02 | 1.94E-01 | 0.153083885 | Shmt1              | 1 |
| GO:0014733 | regulation of skeletal muscle adaptation             | 15/21092  | 3.57E-02 | 1.94E-01 | 0.153083885 | Tnnt2              | 1 |
| GO:0014857 | regulation of skeletal muscle cell proliferation     | 15/21092  | 3.57E-02 | 1.94E-01 | 0.153083885 | Ephb1              | 1 |
| GO:0031280 | negative regulation of cyclase activity              | 15/21092  | 3.57E-02 | 1.94E-01 | 0.153083885 | Drd2               | 1 |
| GO:0043129 | surfactant homeostasis                               | 15/21092  | 3.57E-02 | 1.94E-01 | 0.153083885 | Ctsh               | 1 |
| GO:0051974 | negative regulation of telomerase activity           | 15/21092  | 3.57E-02 | 1.94E-01 | 0.153083885 | Parp3              | 1 |
| GO:0060134 | prepulse inhibition                                  | 15/21092  | 3.57E-02 | 1.94E-01 | 0.153083885 | Drd2               | 1 |
| GO:0060192 | negative regulation of lipase activity               | 15/21092  | 3.57E-02 | 1.94E-01 | 0.153083885 | Snap91             | 1 |
| GO:0072189 | ureter development                                   | 15/21092  | 3.57E-02 | 1.94E-01 | 0.153083885 | Tbx18              | 1 |
| GO:0072498 | embryonic skeletal joint development                 | 15/21092  | 3.57E-02 | 1.94E-01 | 0.153083885 | Hyal1              | 1 |
| GO:0098926 | postsynaptic signal transduction                     | 15/21092  | 3.57E-02 | 1.94E-01 | 0.153083885 | Nrg1               | 1 |
| GO:0099527 | postsynapse to nucleus signaling pathway             | 15/21092  | 3.57E-02 | 1.94E-01 | 0.153083885 | Nrg1               | 1 |
| GO:1903423 | positive regulation of synaptic vesicle recycling    | 15/21092  | 3.57E-02 | 1.94E-01 | 0.153083885 | Snap91             | 1 |
| GO:2000369 | regulation of clathrin-dependent endocytosis         | 15/21092  | 3.57E-02 | 1.94E-01 | 0.153083885 | Snap91             | 1 |
| GO:0015837 | amine transport                                      | 123/21092 | 3.57E-02 | 1.94E-01 | 0.153083885 | Slc38a3/Drd2       | 2 |

|            |                                                                           |           |          |          |             |                   |   |
|------------|---------------------------------------------------------------------------|-----------|----------|----------|-------------|-------------------|---|
| GO:0061387 | regulation of extent of cell growth                                       | 124/21092 | 3.62E-02 | 1.94E-01 | 0.153083885 | Ntn1/Nrg1         | 2 |
| GO:0009582 | detection of abiotic stimulus                                             | 125/21092 | 3.68E-02 | 1.94E-01 | 0.153083885 | Guca1b/Ephb1      | 2 |
| GO:0034763 | negative regulation of transmembrane transport                            | 125/21092 | 3.68E-02 | 1.94E-01 | 0.153083885 | Gnb5/Drd2         | 2 |
| GO:0046677 | response to antibiotic                                                    | 303/21092 | 3.69E-02 | 1.94E-01 | 0.153083885 | Drd2/Cyb5r4/Hyal1 | 3 |
| GO:0009581 | detection of external stimulus                                            | 126/21092 | 3.73E-02 | 1.94E-01 | 0.153083885 | Guca1b/Ephb1      | 2 |
| GO:0006836 | neurotransmitter transport                                                | 306/21092 | 3.78E-02 | 1.94E-01 | 0.153083885 | Snap91/Drd2/Adcy1 | 3 |
| GO:0035966 | response to topologically incorrect protein                               | 127/21092 | 3.79E-02 | 1.94E-01 | 0.153083885 | Hspa1/Chac1       | 2 |
| GO:0097553 | calcium ion transmembrane import into cytosol                             | 127/21092 | 3.79E-02 | 1.94E-01 | 0.153083885 | Drd2/Ryr1         | 2 |
| GO:002031  | G protein-coupled receptor internalization                                | 16/21092  | 3.80E-02 | 1.94E-01 | 0.153083885 | Drd2              | 1 |
| GO:002098  | tRNA wobble uridine modification                                          | 16/21092  | 3.80E-02 | 1.94E-01 | 0.153083885 | Mto1              | 1 |
| GO:0014856 | skeletal muscle cell proliferation                                        | 16/21092  | 3.80E-02 | 1.94E-01 | 0.153083885 | Ephb1             | 1 |
| GO:0043968 | histone H2A acetylation                                                   | 16/21092  | 3.80E-02 | 1.94E-01 | 0.153083885 | Morf4l1           | 1 |
| GO:0046112 | nucleobase biosynthetic process                                           | 16/21092  | 3.80E-02 | 1.94E-01 | 0.153083885 | Shmt1             | 1 |
| GO:0072672 | neutrophil extravasation                                                  | 16/21092  | 3.80E-02 | 1.94E-01 | 0.153083885 | Ripor2            | 1 |
| GO:2001015 | negative regulation of skeletal muscle cell differentiation               | 16/21092  | 3.80E-02 | 1.94E-01 | 0.153083885 | Ephb1             | 1 |
| GO:0044282 | small molecule catabolic process                                          | 308/21092 | 3.84E-02 | 1.94E-01 | 0.153083885 | Glb1/Hyal1/Shmt1  | 3 |
| GO:0051271 | negative regulation of cellular component movement                        | 311/21092 | 3.93E-02 | 1.94E-01 | 0.153083885 | Drd2/Ripor2/Nrg1  | 3 |
| GO:0007189 | adenylate cyclase-activating G protein-coupled receptor signaling pathway | 130/21092 | 3.95E-02 | 1.94E-01 | 0.153083885 | Drd2/Adcy1        | 2 |
| GO:0008037 | cell recognition                                                          | 131/21092 | 4.00E-02 | 1.94E-01 | 0.153083885 | Ephb1/Hspa1l      | 2 |
| GO:1902850 | microtubule cytoskeleton organization involved in mitosis                 | 131/21092 | 4.00E-02 | 1.94E-01 | 0.153083885 | Parp3/Ripor2      | 2 |
| GO:0007638 | mechanosensory behavior                                                   | 17/21092  | 4.03E-02 | 1.94E-01 | 0.153083885 | Drd2              | 1 |
| GO:0009070 | serine family amino acid biosynthetic process                             | 17/21092  | 4.03E-02 | 1.94E-01 | 0.153083885 | Shmt1             | 1 |
| GO:0010224 | response to UV-B                                                          | 17/21092  | 4.03E-02 | 1.94E-01 | 0.153083885 | Hyal1             | 1 |
| GO:0032225 | regulation of synaptic transmission, dopaminergic                         | 17/21092  | 4.03E-02 | 1.94E-01 | 0.153083885 | Drd2              | 1 |
| GO:0042754 | negative regulation of circadian rhythm                                   | 17/21092  | 4.03E-02 | 1.94E-01 | 0.153083885 | Drd2              | 1 |
| GO:0042756 | drinking behavior                                                         | 17/21092  | 4.03E-02 | 1.94E-01 | 0.153083885 | Drd2              | 1 |

|            |                                                                          |           |          |          |             |                 |   |
|------------|--------------------------------------------------------------------------|-----------|----------|----------|-------------|-----------------|---|
| GO:0048875 | chemical homeostasis within a tissue                                     | 17/21092  | 4.03E-02 | 1.94E-01 | 0.153083885 | Ctsh            | 1 |
| GO:0051350 | negative regulation of lyase activity                                    | 17/21092  | 4.03E-02 | 1.94E-01 | 0.153083885 | Drd2            | 1 |
| GO:0097091 | synaptic vesicle clustering                                              | 17/21092  | 4.03E-02 | 1.94E-01 | 0.153083885 | Snap91          | 1 |
| GO:0010821 | regulation of mitochondrion organization                                 | 132/21092 | 4.06E-02 | 1.94E-01 | 0.153083885 | Cideb/Hspa1l    | 2 |
| GO:0017158 | regulation of calcium ion-dependent exocytosis                           | 132/21092 | 4.06E-02 | 1.94E-01 | 0.153083885 | Drd2/Adcy1      | 2 |
| GO:0046488 | phosphatidylinositol metabolic process                                   | 133/21092 | 4.12E-02 | 1.94E-01 | 0.153083885 | Pgap2/Pigf      | 2 |
| GO:0050905 | neuromuscular process                                                    | 133/21092 | 4.12E-02 | 1.94E-01 | 0.153083885 | Drd2/Nrg1       | 2 |
| GO:0007204 | positive regulation of cytosolic calcium ion concentration               | 317/21092 | 4.12E-02 | 1.94E-01 | 0.153083885 | Drd2/Ackr4/Ryr1 | 3 |
| GO:0030010 | establishment of cell polarity                                           | 134/21092 | 4.17E-02 | 1.94E-01 | 0.153083885 | Ephb1/Ripor2    | 2 |
| GO:0048675 | axon extension                                                           | 134/21092 | 4.17E-02 | 1.94E-01 | 0.153083885 | Ntn1/Nrg1       | 2 |
| GO:0006595 | polyamine metabolic process                                              | 18/21092  | 4.27E-02 | 1.94E-01 | 0.153083885 | Sms             | 1 |
| GO:0009309 | amine biosynthetic process                                               | 18/21092  | 4.27E-02 | 1.94E-01 | 0.153083885 | Sms             | 1 |
| GO:0031643 | positive regulation of myelination                                       | 18/21092  | 4.27E-02 | 1.94E-01 | 0.153083885 | Nrg1            | 1 |
| GO:0033604 | negative regulation of catecholamine secretion                           | 18/21092  | 4.27E-02 | 1.94E-01 | 0.153083885 | Drd2            | 1 |
| GO:0036120 | cellular response to platelet-derived growth factor stimulus             | 18/21092  | 4.27E-02 | 1.94E-01 | 0.153083885 | Hyal1           | 1 |
| GO:0042219 | cellular modified amino acid catabolic process                           | 18/21092  | 4.27E-02 | 1.94E-01 | 0.153083885 | Chac1           | 1 |
| GO:0042401 | cellular biogenic amine biosynthetic process                             | 18/21092  | 4.27E-02 | 1.94E-01 | 0.153083885 | Sms             | 1 |
| GO:0043278 | response to morphine                                                     | 18/21092  | 4.27E-02 | 1.94E-01 | 0.153083885 | Drd2            | 1 |
| GO:0048268 | clathrin coat assembly                                                   | 18/21092  | 4.27E-02 | 1.94E-01 | 0.153083885 | Snap91          | 1 |
| GO:0050650 | chondroitin sulfate proteoglycan biosynthetic process                    | 18/21092  | 4.27E-02 | 1.94E-01 | 0.153083885 | Pxylp1          | 1 |
| GO:0050961 | detection of temperature stimulus involved in sensory perception         | 18/21092  | 4.27E-02 | 1.94E-01 | 0.153083885 | Ephb1           | 1 |
| GO:0050965 | detection of temperature stimulus involved in sensory perception of pain | 18/21092  | 4.27E-02 | 1.94E-01 | 0.153083885 | Ephb1           | 1 |
| GO:0051481 | negative regulation of cytosolic calcium ion concentration               | 18/21092  | 4.27E-02 | 1.94E-01 | 0.153083885 | Drd2            | 1 |
| GO:0060088 | auditory receptor cell stereocilium organization                         | 18/21092  | 4.27E-02 | 1.94E-01 | 0.153083885 | Ripor2          | 1 |
| GO:0070886 | positive regulation of calcineurin-NFAT signaling cascade                | 18/21092  | 4.27E-02 | 1.94E-01 | 0.153083885 | Nrg1            | 1 |
| GO:0106058 | positive regulation of calcineurin-mediated signaling                    | 18/21092  | 4.27E-02 | 1.94E-01 | 0.153083885 | Nrg1            | 1 |



|            |                                                                           |           |          |          |             |                  |   |
|------------|---------------------------------------------------------------------------|-----------|----------|----------|-------------|------------------|---|
| GO:1904424 | regulation of GTP binding                                                 | 18/21092  | 4.27E-02 | 1.94E-01 | 0.153083885 | Ripor2           | 1 |
| GO:0046928 | regulation of neurotransmitter secretion                                  | 137/21092 | 4.34E-02 | 1.95E-01 | 0.153818291 | Drd2/Adcy1       | 2 |
| GO:0009267 | cellular response to starvation                                           | 139/21092 | 4.46E-02 | 1.95E-01 | 0.153818291 | Nprl2/Slc38a3    | 2 |
| GO:0040013 | negative regulation of locomotion                                         | 328/21092 | 4.49E-02 | 1.95E-01 | 0.153818291 | Drd2/Ripor2/Nrg1 | 3 |
| GO:0001975 | response to amphetamine                                                   | 19/21092  | 4.50E-02 | 1.95E-01 | 0.153818291 | Drd2             | 1 |
| GO:0002097 | tRNA wobble base modification                                             | 19/21092  | 4.50E-02 | 1.95E-01 | 0.153818291 | Mto1             | 1 |
| GO:0006027 | glycosaminoglycan catabolic process                                       | 19/21092  | 4.50E-02 | 1.95E-01 | 0.153818291 | Hyal1            | 1 |
| GO:0010447 | response to acidic pH                                                     | 19/21092  | 4.50E-02 | 1.95E-01 | 0.153818291 | Slc38a3          | 1 |
| GO:0010996 | response to auditory stimulus                                             | 19/21092  | 4.50E-02 | 1.95E-01 | 0.153818291 | Drd2             | 1 |
| GO:0014072 | response to isoquinoline alkaloid                                         | 19/21092  | 4.50E-02 | 1.95E-01 | 0.153818291 | Drd2             | 1 |
| GO:0014808 | release of sequestered calcium ion into cytosol by sarcoplasmic reticulum | 19/21092  | 4.50E-02 | 1.95E-01 | 0.153818291 | Ryr1             | 1 |
| GO:0036119 | response to platelet-derived growth factor                                | 19/21092  | 4.50E-02 | 1.95E-01 | 0.153818291 | Hyal1            | 1 |
| GO:0043931 | ossification involved in bone maturation                                  | 19/21092  | 4.50E-02 | 1.95E-01 | 0.153818291 | Ryr1             | 1 |
| GO:1903214 | regulation of protein targeting to mitochondrion                          | 19/21092  | 4.50E-02 | 1.95E-01 | 0.153818291 | Hspa1l           | 1 |
| GO:0007613 | memory                                                                    | 141/21092 | 4.57E-02 | 1.95E-01 | 0.153818291 | Drd2/Adcy1       | 2 |
| GO:0045017 | glycerolipid biosynthetic process                                         | 141/21092 | 4.57E-02 | 1.95E-01 | 0.153818291 | Pgap2/Pigf       | 2 |
| GO:0010634 | positive regulation of epithelial cell migration                          | 142/21092 | 4.63E-02 | 1.95E-01 | 0.153818291 | Ctsh/Hyal1       | 2 |
| GO:0019233 | sensory perception of pain                                                | 142/21092 | 4.63E-02 | 1.95E-01 | 0.153818291 | Ephb1/Scn10a     | 2 |
| GO:0016079 | synaptic vesicle exocytosis                                               | 143/21092 | 4.69E-02 | 1.95E-01 | 0.153818291 | Drd2/Adcy1       | 2 |
| GO:0002693 | positive regulation of cellular extravasation                             | 20/21092  | 4.73E-02 | 1.95E-01 | 0.153818291 | Ripor2           | 1 |
| GO:0010560 | positive regulation of glycoprotein biosynthetic process                  | 20/21092  | 4.73E-02 | 1.95E-01 | 0.153818291 | Pxylp1           | 1 |
| GO:0014075 | response to amine                                                         | 20/21092  | 4.73E-02 | 1.95E-01 | 0.153818291 | Drd2             | 1 |
| GO:0042451 | purine nucleoside biosynthetic process                                    | 20/21092  | 4.73E-02 | 1.95E-01 | 0.153818291 | Nt5e             | 1 |
| GO:0046129 | purine ribonucleoside biosynthetic process                                | 20/21092  | 4.73E-02 | 1.95E-01 | 0.153818291 | Nt5e             | 1 |
| GO:0046653 | tetrahydrofolate metabolic process                                        | 20/21092  | 4.73E-02 | 1.95E-01 | 0.153818291 | Shmt1            | 1 |
| GO:0060123 | regulation of growth hormone secretion                                    | 20/21092  | 4.73E-02 | 1.95E-01 | 0.153818291 | Drd2             | 1 |

|            |                                                                                        |           |          |          |             |                  |   |
|------------|----------------------------------------------------------------------------------------|-----------|----------|----------|-------------|------------------|---|
| GO:0070977 | bone maturation                                                                        | 20/21092  | 4.73E-02 | 1.95E-01 | 0.153818291 | Ryr1             | 1 |
| GO:1903514 | release of sequestered calcium ion into cytosol by endoplasmic reticulum               | 20/21092  | 4.73E-02 | 1.95E-01 | 0.153818291 | Ryr1             | 1 |
| GO:2000010 | positive regulation of protein localization to cell surface                            | 20/21092  | 4.73E-02 | 1.95E-01 | 0.153818291 | Nrg1             | 1 |
| GO:2000114 | regulation of establishment of cell polarity                                           | 20/21092  | 4.73E-02 | 1.95E-01 | 0.153818291 | Ripor2           | 1 |
| GO:0010769 | regulation of cell morphogenesis involved in differentiation                           | 336/21092 | 4.76E-02 | 1.96E-01 | 0.154394136 | Snap91/Ntn1/Nrg1 | 3 |
| GO:0001976 | neurological system process involved in regulation of systemic arterial blood pressure | 21/21092  | 4.96E-02 | 1.99E-01 | 0.157260746 | Drd2             | 1 |
| GO:0007190 | activation of adenylate cyclase activity                                               | 21/21092  | 4.96E-02 | 1.99E-01 | 0.157260746 | Adcy1            | 1 |
| GO:0007625 | grooming behavior                                                                      | 21/21092  | 4.96E-02 | 1.99E-01 | 0.157260746 | Drd2             | 1 |
| GO:0015012 | heparan sulfate proteoglycan biosynthetic process                                      | 21/21092  | 4.96E-02 | 1.99E-01 | 0.157260746 | Pxylp1           | 1 |
| GO:0031290 | retinal ganglion cell axon guidance                                                    | 21/21092  | 4.96E-02 | 1.99E-01 | 0.157260746 | Ephb1            | 1 |
| GO:0043501 | skeletal muscle adaptation                                                             | 21/21092  | 4.96E-02 | 1.99E-01 | 0.157260746 | Tnnt2            | 1 |
| GO:1901673 | regulation of mitotic spindle assembly                                                 | 21/21092  | 4.96E-02 | 1.99E-01 | 0.157260746 | Ripor2           | 1 |
| GO:0060402 | calcium ion transport into cytosol                                                     | 148/21092 | 4.99E-02 | 2.00E-01 | 0.157614938 | Drd2/Ryr1        | 2 |

Supp Table S8. List of Differentially Expressed genes at FDR 5% in *Gnb5*<sup>-/-</sup> mice - atria

| Ensembl ID         | Gene Symbol | Gene name                                              | baseMean    | log2FoldChange | lfcSE       | stat         | pvalue      | padj        |
|--------------------|-------------|--------------------------------------------------------|-------------|----------------|-------------|--------------|-------------|-------------|
| ENSMUSG00000032224 | Fam81a      | family with sequence similarity 81, member A           | 292.8574685 | 2.335882638    | 0.253579957 | 9.211621721  | 3.21234E-20 | 6.22167E-16 |
| ENSMUSG00000032192 | Gnb5        | guanine nucleotide binding protein (G protein), beta 5 | 588.3942165 | -0.927754237   | 0.10834755  | -8.562761538 | 1.10196E-17 | 1.06714E-13 |
| ENSMUSG00000033419 | Snap91      | synaptosomal-associated protein 91                     | 593.4008865 | -0.644595104   | 0.121995504 | -5.283761128 | 1.26558E-07 | 0.00081706  |
| ENSMUSG00000051378 | Kif18b      | kinesin family member 18B                              | 20.36546888 | 2.054560276    | 0.444055668 | 4.626807909  | 3.71345E-06 | 0.014384406 |
| ENSMUSG00000078137 | Ankrd63     | ankyrin repeat domain 63                               | 231.3397505 | 0.696118485    | 0.148990179 | 4.672244111  | 2.97927E-06 | 0.014384406 |
| ENSMUSG00000053093 | Myh7        | myosin, heavy polypeptide 7, cardiac muscle, beta      | 251.3134444 | -0.96720691    | 0.212994578 | -4.540993103 | 5.59899E-06 | 0.018073528 |
| ENSMUSG00000023979 | Guca1b      | guanylate cyclase activator 1B                         | 58.67765502 | 0.974404672    | 0.217497591 | 4.480071111  | 7.46182E-06 | 0.020645783 |

Supp Table S9. List of Differentially Expressed genes at FDR 5% in *Gnb5*<sup>-/-</sup> mice - ventricle

| Ensembl ID         | Gene Symbol | Gene name                                              | baseMean    | log2FoldChange | lfcSE       | stat         | pvalue      | padj        |
|--------------------|-------------|--------------------------------------------------------|-------------|----------------|-------------|--------------|-------------|-------------|
| ENSMUSG00000032192 | Gnb5        | guanine nucleotide binding protein (G protein), beta 5 | 313.5699776 | -0.960435275   | 0.123650627 | -7.767330392 | 8.01576E-15 | 1.39723E-10 |
| ENSMUSG00000032224 | Fam81a      | family with sequence similarity 81, member A           | 535.3572241 | 1.099542929    | 0.159014957 | 6.914713879  | 4.68809E-12 | 4.0859E-08  |

Supp Table S10. List of Differentially Expressed genes at FDR 5% in *Gnb5*<sup>-/-</sup> mice - cerebellum

| Ensembl ID         | Gene Symbol | Gene name                                                                                     | baseMean    | log2FoldChange | lfcSE       | stat         | pvalue      | padj        |
|--------------------|-------------|-----------------------------------------------------------------------------------------------|-------------|----------------|-------------|--------------|-------------|-------------|
| ENSMUSG00000032192 | Gnb5        | guanine nucleotide binding protein (G protein), beta 5                                        | 3776.684327 | -2.827640286   | 0.055298441 | -51.13417754 | 0.00E+00    | < 2.00E-308 |
| ENSMUSG00000023979 | Guca1b      | guanylate cyclase activator 1B                                                                | 437.4550876 | 3.711107472    | 0.099175263 | 37.41968881  | 1.8697E-306 | 1.5621E-302 |
| ENSMUSG00000032232 | Cgnl1       | cingulin-like 1                                                                               | 5161.732469 | 1.318444731    | 0.078033577 | 16.89586428  | 4.8259E-64  | 2.69E-60    |
| ENSMUSG00000048758 | Rpl29       | ribosomal protein L29                                                                         | 167.003666  | -2.662526944   | 0.179928843 | -14.79766612 | 1.51654E-49 | 6.34E-46    |
| ENSMUSG00000032556 | Bfsp2       | beaded filament structural protein 2, phakinin                                                | 65.92606322 | -3.710156999   | 0.343429245 | -10.8032646  | 3.32179E-27 | 1.11E-23    |
| ENSMUSG00000043587 | Pxylp1      | 2-phosphoxylose phosphatase 1                                                                 | 2090.786713 | -0.93940513    | 0.089637192 | -10.48008205 | 1.06651E-25 | 2.97E-22    |
| ENSMUSG00000023277 | Twf2        | twinfilin actin binding protein 2                                                             | 931.2249327 | -0.527947875   | 0.052457731 | -10.06425304 | 7.94884E-24 | 1.90E-20    |
| ENSMUSG00000032498 | Mlh1        | mutL homolog 1                                                                                | 668.627558  | -0.704540452   | 0.072809837 | -9.676445968 | 3.79686E-22 | 7.93E-19    |
| ENSMUSG00000020253 | Ppm1m       | protein phosphatase 1M                                                                        | 736.854351  | -0.583377557   | 0.062857481 | -9.2809567   | 1.67964E-20 | 3.12E-17    |
| ENSMUSG00000062270 | Morf4l1     | mortality factor 4 like 1                                                                     | 4272.079558 | -0.455630844   | 0.050708541 | -8.985288001 | 2.58058E-19 | 4.31E-16    |
| ENSMUSG00000062270 | Morf4l1b    | mortality factor 4 like 1B                                                                    | 4272.079558 | -0.455630844   | 0.050708541 | -8.985288001 | 2.58058E-19 | 4.31E-16    |
| ENSMUSG00000032500 | Dclk3       | doublecortin-like kinase 3                                                                    | 227.5683369 | 1.633993963    | 0.194019129 | 8.421818885  | 3.70684E-17 | 5.63E-14    |
| ENSMUSG00000032563 | Mrpl3       | mitochondrial ribosomal protein L3                                                            | 2535.527483 | -0.354146675   | 0.043154236 | -8.206533358 | 2.27666E-16 | 3.17E-13    |
| ENSMUSG00000104282 | Gm37460     | predicted gene 37460                                                                          | 24.0513232  | -3.989910368   | 0.490489586 | -8.134546545 | 4.13483E-16 | 5.31E-13    |
| ENSMUSG00000090626 | Tex9        | testis expressed gene 9                                                                       | 591.5495903 | -0.682683678   | 0.084985708 | -8.032923324 | 9.51772E-16 | 1.14E-12    |
| ENSMUSG00000032567 | Aste1       | asteroid homolog 1                                                                            | 261.2643017 | -0.726216234   | 0.103776418 | -6.997892664 | 2.59841E-12 | 2.89E-09    |
| ENSMUSG00000036545 | Adams2      | a disintegrin-like and metallopeptidase (reprolysin type) with thrombospondin type 1 motif, 2 | 865.4646909 | -0.444637534   | 0.063619194 | -6.989046931 | 2.7676E-12  | 2.89E-09    |
| ENSMUSG00000043719 | Col6a6      | collagen, type VI, alpha 6                                                                    | 86.23142466 | 1.431557776    | 0.205901274 | 6.952641647  | 3.58509E-12 | 3.52E-09    |

|                    |               |                                                          |             |              |             |              |             |          |
|--------------------|---------------|----------------------------------------------------------|-------------|--------------|-------------|--------------|-------------|----------|
| ENSMUSG00000103164 | Gm38150       | predicted gene 38150                                     | 75.50295187 | 1.856335622  | 0.270406058 | 6.864992725  | 6.64946E-12 | 6.17E-09 |
| ENSMUSG00000104286 | Gm37457       | predicted gene 37457                                     | 83.69435181 | -1.396799984 | 0.20663308  | -6.759808188 | 1.38175E-11 | 1.22E-08 |
| ENSMUSG00000032494 | Tdgf1         | teratocarcinoma-derived growth factor 1                  | 88.70981041 | -1.228803344 | 0.187927365 | -6.53871426  | 6.20499E-11 | 5.18E-08 |
| ENSMUSG00000020096 | Tbata         | thymus, brain and testes associated                      | 1971.627299 | 0.271356344  | 0.041688236 | 6.509182673  | 7.55608E-11 | 6.01E-08 |
| ENSMUSG00000032418 | Me1           | malic enzyme 1, NADP(+)-dependent, cytosolic             | 2486.718734 | 0.398420712  | 0.061534107 | 6.474794711  | 9.49409E-11 | 7.21E-08 |
| ENSMUSG00000002020 | Ltbp2         | latent transforming growth factor beta binding protein 2 | 4421.817622 | -0.490281841 | 0.076725482 | -6.390078353 | 1.65801E-10 | 1.20E-07 |
| ENSMUSG00000032554 | Trf           | transferrin                                              | 516.363827  | -0.885336834 | 0.14025914  | -6.312150725 | 2.75184E-10 | 1.92E-07 |
| ENSMUSG00000032495 | Lrrc2         | leucine rich repeat containing 2                         | 337.4958733 | -0.80567915  | 0.129576646 | -6.217780565 | 5.04236E-10 | 3.37E-07 |
| ENSMUSG00000102225 | Gm37983       | predicted gene 37983                                     | 24.91169952 | 1.872814001  | 0.301640962 | 6.208752252  | 5.34069E-10 | 3.43E-07 |
| ENSMUSG00000023495 | Pcbp4         | poly(rC) binding protein 4                               | 9608.983245 | 0.438156046  | 0.070693682 | 6.197951952  | 5.72026E-10 | 3.54E-07 |
| ENSMUSG00000111348 | Gm19531       | predicted gene 19531                                     | 50.79214136 | -1.15586438  | 0.18808935  | -6.145294146 | 7.98155E-10 | 4.76E-07 |
| ENSMUSG00000032383 | Ppib          | peptidylprolyl isomerase B                               | 5797.045453 | 0.340285278  | 0.056151123 | 6.060168681  | 1.35979E-09 | 7.84E-07 |
| ENSMUSG00000032221 | Mns1          | meiosis-specific nuclear structural protein 1            | 56.59125716 | -1.175230186 | 0.195568968 | -6.009287647 | 1.8634E-09  | 1.00E-06 |
| ENSMUSG00000059003 | Grin2a        | glutamate receptor, ionotropic, NMDA2A (epsilon 1)       | 4488.448054 | -0.246141364 | 0.040933749 | -6.013164469 | 1.81936E-09 | 1.00E-06 |
| ENSMUSG00000032411 | Tfdp2         | transcription factor Dp 2                                | 2502.966265 | 0.41235966   | 0.0699472   | 5.895299004  | 3.74004E-09 | 1.95E-06 |
| ENSMUSG00000023345 | Poc1a         | POC1 centriolar protein A                                | 91.35994109 | -0.946728825 | 0.160973191 | -5.881282596 | 4.07099E-09 | 2.06E-06 |
| ENSMUSG00000034898 | Filip1        | filamin A interacting protein 1                          | 217.3345229 | 1.070995942  | 0.185443542 | 5.775320789  | 7.68066E-09 | 3.77E-06 |
| ENSMUSG00000010057 | Nprl2         | NPR2 like, GATOR1 complex subunit                        | 1400.200434 | 0.277235707  | 0.048216138 | 5.749853009  | 8.93211E-09 | 4.15E-06 |
| ENSMUSG00000051590 | Map3k19       | mitogen-activated protein kinase kinase kinase 19        | 151.7662179 | -0.72256102  | 0.125662208 | -5.75002643  | 8.92295E-09 | 4.15E-06 |
| ENSMUSG00000091735 | Gpr62         | G protein-coupled receptor 62                            | 313.5180019 | 0.686846592  | 0.119742794 | 5.736016061  | 9.69295E-09 | 4.38E-06 |
| ENSMUSG00000040536 | Necab1        | N-terminal EF-hand calcium binding protein 1             | 1182.606983 | -0.675042081 | 0.119629524 | -5.642771587 | 1.67334E-08 | 7.36E-06 |
| ENSMUSG00000087466 | A330041J22Rik | RIKEN cDNA A330041J22 gene                               | 74.58228965 | 1.434589369  | 0.256512536 | 5.592667679  | 2.23607E-08 | 9.58E-06 |
| ENSMUSG00000044037 | Als2cl        | ALS2 C-terminal like                                     | 1028.642711 | -0.418008066 | 0.075093528 | -5.566499248 | 2.59908E-08 | 1.09E-05 |
| ENSMUSG00000070469 | Adamtsl3      | ADAMTS-like 3                                            | 113.9892968 | -0.662897133 | 0.122069091 | -5.43050764  | 5.6194E-08  | 2.29E-05 |
| ENSMUSG00000023868 | Pde10a        | phosphodiesterase 10A                                    | 6880.473669 | -0.676534037 | 0.125581847 | -5.387196095 | 7.15653E-08 | 2.85E-05 |

|                    |               |                                                                                             |             |              |             |              |             |          |
|--------------------|---------------|---------------------------------------------------------------------------------------------|-------------|--------------|-------------|--------------|-------------|----------|
| ENSMUSG00000057802 | Gm10030       | predicted gene 10030                                                                        | 21.42515066 | -1.977535225 | 0.375457621 | -5.266999825 | 1.38671E-07 | 5.39E-05 |
| ENSMUSG00000032360 | Hcrtr2        | hypocretin (orexin) receptor 2                                                              | 28.96765092 | -1.487211303 | 0.285983133 | -5.200346213 | 1.98918E-07 | 7.55E-05 |
| ENSMUSG00000024403 | Atp6v1g2      | ATPase, H <sup>+</sup> transporting, lysosomal V1 subunit G2                                | 10912.75865 | 0.157684878  | 0.030688324 | 5.138269387  | 2.7728E-07  | 1.03E-04 |
| ENSMUSG00000102568 | Gm37040       | predicted gene 37040                                                                        | 36.43245889 | -1.278054894 | 0.249989747 | -5.112429236 | 3.18042E-07 | 1.16E-04 |
| ENSMUSG00000033590 | Myo5c         | myosin VC                                                                                   | 265.6388649 | -0.549651459 | 0.109058116 | -5.039986752 | 4.65564E-07 | 1.66E-04 |
| ENSMUSG00000032872 | Cyb5r4        | cytochrome b5 reductase 4                                                                   | 2148.279031 | -0.43931008  | 0.087835518 | -5.001508373 | 5.68835E-07 | 1.98E-04 |
| ENSMUSG00000047021 | Cfap65        | cilia and flagella associated protein 65                                                    | 28.70220643 | -1.970744625 | 0.396179632 | -4.974371384 | 6.54597E-07 | 2.23E-04 |
| ENSMUSG00000042761 | Mrap2         | melanocortin 2 receptor accessory protein 2                                                 | 223.3199552 | 1.820064844  | 0.366864164 | 4.961140998  | 7.00803E-07 | 2.34E-04 |
| ENSMUSG00000090150 | Acad11        | acyl-Coenzyme A dehydrogenase family, member 11                                             | 1333.016891 | -0.242690676 | 0.049029394 | -4.949901548 | 7.4251E-07  | 2.43E-04 |
| ENSMUSG00000056596 | Trnp1         | TMF1-regulated nuclear protein 1                                                            | 2707.369654 | 0.257405668  | 0.052080717 | 4.942437138  | 7.7152E-07  | 2.48E-04 |
| ENSMUSG00000074415 | 3110039I08Rik | RIKEN cDNA 3110039I08 gene                                                                  | 858.8892546 | -0.347692944 | 0.071049825 | -4.893649586 | 9.8983E-07  | 3.12E-04 |
| ENSMUSG00000045414 | 1190002N15Rik | RIKEN cDNA 1190002N15 gene                                                                  | 9479.974493 | 0.203857188  | 0.041965151 | 4.857773243  | 1.18713E-06 | 3.67E-04 |
| ENSMUSG00000019929 | Dcn           | decorin                                                                                     | 945.0632883 | -0.39965724  | 0.083620332 | -4.77942659  | 1.75796E-06 | 5.34E-04 |
| ENSMUSG00000018659 | Pnpo          | pyridoxine 5'-phosphate oxidase                                                             | 1853.661258 | 0.24366376   | 0.051217163 | 4.757463036  | 1.96041E-06 | 5.64E-04 |
| ENSMUSG00000021265 | Slc25a29      | solute carrier family 25 (mitochondrial carrier, palmitoylcarnitine transporter), member 29 | 1086.377437 | 0.293381215  | 0.061607831 | 4.762076706  | 1.91611E-06 | 5.64E-04 |
| ENSMUSG00000041506 | Rrp9          | RRP9, small subunit (SSU) processome component, homolog (yeast)                             | 633.4693325 | -0.348737041 | 0.073351895 | -4.754301764 | 1.99133E-06 | 5.64E-04 |
| ENSMUSG00000032436 | Cmtm7         | CKLF-like MARVEL transmembrane domain containing 7                                          | 225.5308249 | -0.784340082 | 0.165355327 | -4.743361447 | 2.10201E-06 | 5.85E-04 |
| ENSMUSG00000070720 | Tmem200b      | transmembrane protein 200B                                                                  | 879.3241942 | 0.237178838  | 0.050148875 | 4.729494708  | 2.25079E-06 | 6.17E-04 |
| ENSMUSG00000029822 | Osbp13        | oxysterol binding protein-like 3                                                            | 2125.961608 | -0.339350961 | 0.073793709 | -4.598643542 | 4.25251E-06 | 1.15E-03 |
| ENSMUSG00000010048 | Ifrd2         | interferon-related developmental regulator 2                                                | 562.5877885 | 0.365850749  | 0.080007846 | 4.572685919  | 4.81512E-06 | 1.28E-03 |
| ENSMUSG00000045967 | Gpr158        | G protein-coupled receptor 158                                                              | 12290.27869 | -0.241962539 | 0.053293038 | -4.540227925 | 5.61934E-06 | 1.47E-03 |
| ENSMUSG00000032356 | Rasgrf1       | RAS protein-specific guanine nucleotide-releasing factor 1                                  | 15290.93068 | 0.499536916  | 0.110479983 | 4.521515126  | 6.13986E-06 | 1.58E-03 |

|                     |         |                                                              |             |              |             |              |             |          |
|---------------------|---------|--------------------------------------------------------------|-------------|--------------|-------------|--------------|-------------|----------|
| ENSMUSG00000036760  | Kcnk9   | potassium channel, subfamily K, member 9                     | 13243.63708 | -0.292027828 | 0.06499848  | -4.492840872 | 7.02793E-06 | 1.76E-03 |
| ENSMUSG00000049624  | Slc17a5 | solute carrier family 17 (anion/sugar transporter), member 5 | 892.3986237 | -0.346728247 | 0.077198643 | -4.491377501 | 7.0764E-06  | 1.76E-03 |
| ENSMUSG00000032497  | Lrrfip2 | leucine rich repeat (in FLII) interacting protein 2          | 1954.49032  | -0.165756146 | 0.037035569 | -4.47559331  | 7.61994E-06 | 1.87E-03 |
| ENSMUSG00000024830  | Rps6kb2 | ribosomal protein S6 kinase, polypeptide 2                   | 2329.153627 | 0.177815047  | 0.039942537 | 4.451771506  | 8.51648E-06 | 2.06E-03 |
| ENSMUSG00000042210  | Abhd14a | abhydrolase domain containing 14A                            | 685.2533565 | -0.289047191 | 0.065636456 | -4.403759862 | 1.06391E-05 | 2.50E-03 |
| ENSMUSG00000032570  | Atp2c1  | ATPase, Ca <sup>++</sup> -sequestering                       | 7634.149512 | 0.190293715  | 0.043395191 | 4.38513372   | 1.15915E-05 | 2.69E-03 |
| ENSMUSG00000085564  | Gm12198 | predicted gene 12198                                         | 144.1003058 | -0.655784624 | 0.1506718   | -4.35240452  | 1.34653E-05 | 3.08E-03 |
| ENSMUSG00000025189  | Cnm1    | cyclin M1                                                    | 9936.963016 | 0.171522867  | 0.03971572  | 4.318765082  | 1.56905E-05 | 3.54E-03 |
| ENSMUSG00000026156  | B3gat2  | beta-1,3-glucuronyltransferase 2 (glucuronosyltransferase S) | 1542.762622 | 0.40134508   | 0.093300587 | 4.301635111  | 1.69542E-05 | 3.78E-03 |
| ENSMUSG00000018697  | Aatf    | apoptosis antagonizing transcription factor                  | 909.2901189 | 0.207262888  | 0.048456521 | 4.277296095  | 1.89177E-05 | 4.11E-03 |
| ENSMUSG00000029695  | Aass    | aminoadipate-semialdehyde synthase                           | 502.5914013 | -0.540371692 | 0.126482917 | -4.272289917 | 1.93476E-05 | 4.14E-03 |
| ENSMUSG00000032936  | Camkv   | CaM kinase-like vesicle-associated                           | 155.6519028 | 0.645556244  | 0.151277644 | 4.267360514  | 1.97799E-05 | 4.18E-03 |
| ENSMUSG00000031274  | Col4a5  | collagen, type IV, alpha 5                                   | 423.3176062 | -0.339340123 | 0.079636924 | -4.261090277 | 2.03432E-05 | 4.25E-03 |
| ENSMUSG00000025422  | Agap2   | ArfGAP with GTPase domain, ankyrin repeat and PH domain 2    | 9075.763147 | 0.168987623  | 0.039938014 | 4.231247511  | 2.32399E-05 | 4.79E-03 |
| ENSMUSG00000040929  | Rfx3    | regulatory factor X, 3 (influences HLA class II expression)  | 1948.279304 | -0.227743173 | 0.053898976 | -4.225371062 | 2.38547E-05 | 4.86E-03 |
| ENSMUSG00000046378  | Asphd1  | aspartate beta-hydroxylase domain containing 1               | 600.4949404 | 0.321122754  | 0.076280176 | 4.209779938  | 2.5562E-05  | 5.15E-03 |
| ENSMUSG00000010660  | Plcd1   | phospholipase C, delta 1                                     | 287.7365686 | -0.438423508 | 0.104711926 | -4.186949119 | 2.82729E-05 | 5.56E-03 |
| ENSMUSG00000026676  | Ccdc3   | coiled-coil domain containing 3                              | 194.3461266 | -0.787253495 | 0.187973755 | -4.188103256 | 2.81296E-05 | 5.56E-03 |
| ENSMUSG00000049303  | Syt12   | synaptotagmin XII                                            | 4738.805298 | 0.171600731  | 0.041042568 | 4.181042741  | 2.90175E-05 | 5.64E-03 |
| ENSMUSG00000007594  | Hapln4  | hyaluronan and proteoglycan link protein 4                   | 7762.924373 | 0.20525169   | 0.049244469 | 4.168015088  | 3.07264E-05 | 5.90E-03 |
| ENSMUSG000000053702 | Nebi    | nebulette                                                    | 4122.080911 | -0.200274445 | 0.048467616 | -4.132129069 | 3.59418E-05 | 6.82E-03 |
| ENSMUSG00000070866  | Zfp804a | zinc finger protein 804A                                     | 529.6035357 | -0.273660923 | 0.066470521 | -4.117026906 | 3.83791E-05 | 7.14E-03 |
| ENSMUSG00000103891  | Gm37941 | predicted gene 37941                                         | 90.25718563 | -0.590766007 | 0.143506106 | -4.116661118 | 3.84401E-05 | 7.14E-03 |

|                    |         |                                                                                                |             |              |             |              |             |          |
|--------------------|---------|------------------------------------------------------------------------------------------------|-------------|--------------|-------------|--------------|-------------|----------|
| ENSMUSG00000033577 | Myo6    | myosin VI                                                                                      | 7952.800259 | -0.177308645 | 0.043222703 | -4.102210917 | 4.09221E-05 | 7.51E-03 |
| ENSMUSG00000032562 | Gnai2   | guanine nucleotide binding protein (G protein), alpha inhibiting 2                             | 5695.835318 | 0.209104738  | 0.051108773 | 4.09136684   | 4.28838E-05 | 7.79E-03 |
| ENSMUSG00000022548 | Apod    | apolipoprotein D                                                                               | 7327.803279 | -0.302224918 | 0.074021475 | -4.082935635 | 4.44703E-05 | 7.96E-03 |
| ENSMUSG00000025889 | Snca    | synuclein, alpha                                                                               | 753.7428095 | 0.310662096  | 0.076126465 | 4.080868538  | 4.48677E-05 | 7.96E-03 |
| ENSMUSG00000040003 | Magi2   | membrane associated guanylate kinase, WW and PDZ domain containing 2                           | 3517.01469  | -0.198280333 | 0.048611072 | -4.078912966 | 4.52468E-05 | 7.96E-03 |
| ENSMUSG00000032224 | Fam81a  | family with sequence similarity 81, member A                                                   | 752.0267376 | 0.40135418   | 0.098857026 | 4.059945935  | 4.90841E-05 | 8.46E-03 |
| ENSMUSG00000035941 | lbtk    | inhibitor of Bruton agammaglobulinemia tyrosine kinase                                         | 2259.614768 | -0.234174871 | 0.057652254 | -4.061851089 | 4.86851E-05 | 8.46E-03 |
| ENSMUSG00000053399 | Adams18 | a disintegrin-like and metallopeptidase (reprolysin type) with thrombospondin type 1 motif, 18 | 1245.172925 | -0.535900624 | 0.132150485 | -4.055230107 | 5.0085E-05  | 8.54E-03 |
| ENSMUSG00000031209 | Heph    | hephaestin                                                                                     | 212.499617  | -0.524851774 | 0.129709845 | -4.046352637 | 5.20218E-05 | 8.78E-03 |
| ENSMUSG00000045594 | Glb1    | galactosidase, beta 1                                                                          | 603.8171745 | -0.251329503 | 0.062199    | -4.040732209 | 5.32846E-05 | 8.90E-03 |
| ENSMUSG00000039728 | Slc6a5  | solute carrier family 6 (neurotransmitter transporter, glycine), member 5                      | 2131.525392 | 0.184557898  | 0.0457464   | 4.034369904  | 5.4749E-05  | 9.06E-03 |
| ENSMUSG00000022816 | Fstl1   | folliculin-like 1                                                                              | 656.1358971 | -0.313458386 | 0.077999396 | -4.018728391 | 5.85131E-05 | 9.49E-03 |
| ENSMUSG00000060961 | Slc4a4  | solute carrier family 4 (anion exchanger), member 4                                            | 26482.84028 | -0.210742417 | 0.052420959 | -4.020193892 | 5.81503E-05 | 9.49E-03 |
| ENSMUSG00000032786 | Alas1   | aminolevulinic acid synthase 1                                                                 | 2264.965012 | 0.16544191   | 0.041256635 | 4.010067955  | 6.07013E-05 | 9.60E-03 |
| ENSMUSG00000034780 | B3galt1 | UDP-Gal:betaGlcNAc beta 1,3-galactosyltransferase, polypeptide 1                               | 1512.878245 | -0.228990845 | 0.057113105 | -4.009427354 | 6.08662E-05 | 9.60E-03 |
| ENSMUSG00000042757 | Tmem108 | transmembrane protein 108                                                                      | 1743.966905 | 0.191530914  | 0.047761983 | 4.010112257  | 6.06899E-05 | 9.60E-03 |
| ENSMUSG00000038540 | Tmc3    | transmembrane channel-like gene family 3                                                       | 128.5246132 | -0.635080101 | 0.158674431 | -4.002409822 | 6.27006E-05 | 9.79E-03 |
| ENSMUSG00000019899 | Lama2   | laminin, alpha 2                                                                               | 1767.500596 | -0.307800775 | 0.077002817 | -3.997266444 | 6.40782E-05 | 9.91E-03 |
| ENSMUSG00000020331 | Hcn2    | hyperpolarization-activated, cyclic nucleotide-gated K+ 2                                      | 3684.614211 | 0.211210959  | 0.053011952 | 3.984213928  | 6.77039E-05 | 1.04E-02 |
| ENSMUSG00000079470 | Utp14b  | UTP14B small subunit processome component                                                      | 593.3329387 | -0.43940743  | 0.110425779 | -3.979210594 | 6.91445E-05 | 1.05E-02 |

|                    |               |                                                                      |             |              |             |              |             |          |
|--------------------|---------------|----------------------------------------------------------------------|-------------|--------------|-------------|--------------|-------------|----------|
| ENSMUSG00000043873 | Chil5         | chitinase-like 5                                                     | 569.1443709 | -0.529904212 | 0.134141397 | -3.950340648 | 7.804E-05   | 1.17E-02 |
| ENSMUSG00000034891 | Sncb          | synuclein, beta                                                      | 6033.619166 | 0.257865278  | 0.065369039 | 3.944761662  | 7.98794E-05 | 1.18E-02 |
| ENSMUSG00000111874 | Gm36539       | predicted gene 36539                                                 | 28.68067065 | -1.151072889 | 0.2918086   | -3.944616051 | 7.99279E-05 | 1.18E-02 |
| ENSMUSG00000040813 | Tex264        | testis expressed gene 264                                            | 1627.318836 | 0.24003156   | 0.061051179 | 3.931644982  | 8.43666E-05 | 1.24E-02 |
| ENSMUSG00000024145 | Pigf          | phosphatidylinositol glycan anchor biosynthesis, class F             | 527.8534165 | 0.269835764  | 0.068864084 | 3.918381649  | 8.91455E-05 | 1.30E-02 |
| ENSMUSG00000056019 | Zfp709        | zinc finger protein 709                                              | 716.7501148 | -0.221064446 | 0.05646221  | -3.915263783 | 9.03054E-05 | 1.30E-02 |
| ENSMUSG00000047793 | Sned1         | sushi, nidogen and EGF-like domains 1                                | 5436.766785 | -0.214764333 | 0.054903128 | -3.911695799 | 9.16503E-05 | 1.31E-02 |
| ENSMUSG00000054196 | Cthrc1        | collagen triple helix repeat containing 1                            | 456.6616622 | 0.273577589  | 0.070468467 | 3.882269615  | 0.000103486 | 1.44E-02 |
| ENSMUSG00000062296 | Trank1        | tetratricopeptide repeat and ankyrin repeat containing 1             | 8866.298066 | -0.401596014 | 0.103457199 | -3.881759962 | 0.000103703 | 1.44E-02 |
| ENSMUSG00000032359 | Ctsh          | cathepsin H                                                          | 293.9199692 | -0.380690598 | 0.098160275 | -3.878255222 | 0.000105208 | 1.45E-02 |
| ENSMUSG00000044244 | Il20rb        | interleukin 20 receptor beta                                         | 4371.39349  | -0.294150387 | 0.075956801 | -3.872601062 | 0.00010768  | 1.47E-02 |
| ENSMUSG00000022540 | Rogdi         | rogdi homolog                                                        | 3549.588552 | 0.19537945   | 0.05061794  | 3.859885424  | 0.00011344  | 1.54E-02 |
| ENSMUSG00000036875 | Dna2          | DNA replication helicase/nuclease 2                                  | 172.3546123 | -0.491356217 | 0.128239542 | -3.831550007 | 0.000127338 | 1.72E-02 |
| ENSMUSG00000022131 | Gpr180        | G protein-coupled receptor 180                                       | 1001.298783 | 0.180560403  | 0.047197908 | 3.825601801  | 0.000130453 | 1.74E-02 |
| ENSMUSG00000029304 | Spp1          | secreted phosphoprotein 1                                            | 314.3225449 | -1.037931743 | 0.271691281 | -3.820261514 | 0.00013331  | 1.77E-02 |
| ENSMUSG00000032571 | Pik3r4        | phosphoinositide-3-kinase regulatory subunit 4                       | 2100.770068 | -0.151120322 | 0.039789316 | -3.798012582 | 0.000145861 | 1.92E-02 |
| ENSMUSG00000038665 | Dgki          | diacylglycerol kinase, iota                                          | 1078.595202 | -0.375885813 | 0.099194535 | -3.78938028  | 0.000151024 | 1.97E-02 |
| ENSMUSG00000054976 | Nyap2         | neuronal tyrosine-phosphorylated phosphoinositide 3-kinase adaptor 2 | 1169.835804 | -0.298167703 | 0.078758509 | -3.785847468 | 0.000153186 | 1.98E-02 |
| ENSMUSG00000031865 | Dctn1         | dynactin 1                                                           | 14438.60666 | 0.157031021  | 0.041575282 | 3.77702842   | 0.000158711 | 2.04E-02 |
| ENSMUSG00000032344 | Cgas          | cyclic GMP-AMP synthase                                              | 20.25321073 | -1.137586452 | 0.301649272 | -3.771222276 | 0.00016245  | 2.07E-02 |
| ENSMUSG00000085084 | 4930570G19Rik | RIKEN cDNA 4930570G19 gene                                           | 1161.071062 | -0.278073956 | 0.073863903 | -3.76467995  | 0.000166763 | 2.11E-02 |
| ENSMUSG00000040138 | Ndp           | Norrie disease (pseudoglioma) (human)                                | 707.6201088 | 0.219662722  | 0.058391047 | 3.761924736  | 0.000168611 | 2.12E-02 |
| ENSMUSG00000055254 | Ntrk2         | neurotrophic tyrosine kinase, receptor, type 2                       | 19030.20769 | -0.126891755 | 0.033783148 | -3.75606662  | 0.000172605 | 2.15E-02 |
| ENSMUSG00000027425 | Kat14         | lysine acetyltransferase 14                                          | 1374.54001  | 0.198671813  | 0.053026405 | 3.746658187  | 0.000179206 | 2.22E-02 |



|                    |               |                                                                                 |             |              |             |              |             |          |
|--------------------|---------------|---------------------------------------------------------------------------------|-------------|--------------|-------------|--------------|-------------|----------|
| ENSMUSG0000002274  | Metrn         | meteorin, glial cell differentiation regulator                                  | 5167.733381 | 0.251300779  | 0.067293283 | 3.734411033  | 0.000188155 | 2.31E-02 |
| ENSMUSG00000054555 | Adam12        | a disintegrin and metallopeptidase domain 12 (meltrin alpha)                    | 250.2725205 | -0.367994148 | 0.098586085 | -3.73271897  | 0.000189424 | 2.31E-02 |
| ENSMUSG00000020185 | E2f7          | E2F transcription factor 7                                                      | 64.89049163 | -0.647104213 | 0.173634674 | -3.726814448 | 0.000193915 | 2.31E-02 |
| ENSMUSG00000031558 | Slit2         | slit guidance ligand 2                                                          | 128.0552607 | -0.619583532 | 0.166242811 | -3.726979397 | 0.000193788 | 2.31E-02 |
| ENSMUSG00000032803 | Cdv3          | carnitine deficiency-associated gene expressed in ventricle 3                   | 2963.464124 | -0.225267786 | 0.060576528 | -3.718730583 | 0.000200226 | 2.37E-02 |
| ENSMUSG00000039033 | Tasp1         | taspase, threonine aspartase 1                                                  | 555.9554491 | 0.22670657   | 0.061038063 | 3.714183568  | 0.000203861 | 2.40E-02 |
| ENSMUSG00000032323 | Cyp11a1       | cytochrome P450, family 11, subfamily a, polypeptide 1                          | 160.2036109 | -0.54410811  | 0.146689928 | -3.709239733 | 0.000207883 | 2.43E-02 |
| ENSMUSG00000027737 | Slc7a11       | solute carrier family 7 (cationic amino acid transporter, y+ system), member 11 | 1540.871957 | -0.358277877 | 0.0967587   | -3.702797536 | 0.000213235 | 2.44E-02 |
| ENSMUSG00000033152 | Podxl2        | podocalyxin-like 2                                                              | 6112.985547 | 0.265277682  | 0.071596768 | 3.705162828  | 0.000211255 | 2.44E-02 |
| ENSMUSG00000105230 | Gm42433       | predicted gene 42433                                                            | 287.5596305 | 0.32790406   | 0.088599373 | 3.700974955  | 0.000214773 | 2.44E-02 |
| ENSMUSG00000025780 | Itih5         | inter-alpha (globulin) inhibitor H5                                             | 3052.757631 | -0.257421968 | 0.069613061 | -3.697897575 | 0.000217393 | 2.45E-02 |
| ENSMUSG00000062257 | Opcml         | opioid binding protein/cell adhesion molecule-like                              | 5120.415454 | 0.229556926  | 0.062123271 | 3.695184118  | 0.000219728 | 2.46E-02 |
| ENSMUSG00000002228 | Ppm1j         | protein phosphatase 1J                                                          | 73.97859987 | 0.543936081  | 0.147487001 | 3.688027274  | 0.000225999 | 2.48E-02 |
| ENSMUSG00000020467 | Efemp1        | epidermal growth factor-containing fibulin-like extracellular matrix protein 1  | 661.4773856 | -0.246464103 | 0.066769489 | -3.691268372 | 0.000223139 | 2.48E-02 |
| ENSMUSG00000071793 | 2610005L07Rik | cadherin 11 pseudogene                                                          | 499.0576741 | -0.260764185 | 0.070694432 | -3.688609945 | 0.000225483 | 2.48E-02 |
| ENSMUSG00000037624 | Kcnk2         | potassium channel, subfamily K, member 2                                        | 546.4969263 | -0.275003038 | 0.074638882 | -3.684447469 | 0.000229199 | 2.50E-02 |
| ENSMUSG00000032184 | Lysmd2        | LysM, putative peptidoglycan-binding, domain containing 2                       | 1722.663597 | 0.179859137  | 0.048875377 | 3.679953949  | 0.000233276 | 2.52E-02 |
| ENSMUSG00000053716 | Dusp7         | dual specificity phosphatase 7                                                  | 851.3299296 | -0.261817054 | 0.071153446 | -3.67961174  | 0.000233589 | 2.52E-02 |
| ENSMUSG00000001773 | Folh1         | folate hydrolase 1                                                              | 417.0674349 | -0.340484695 | 0.092777155 | -3.669919545 | 0.000242627 | 2.60E-02 |
| ENSMUSG00000058966 | Fam57b        | family with sequence similarity 57, member B                                    | 4089.571587 | 0.189611427  | 0.051728708 | 3.665497087  | 0.000246859 | 2.63E-02 |
| ENSMUSG00000063382 | Bcl9l         | B cell CLL/lymphoma 9-like                                                      | 2478.992746 | 0.160810433  | 0.043905694 | 3.662632777  | 0.000249636 | 2.64E-02 |
| ENSMUSG00000039163 | Cmc1          | COX assembly mitochondrial protein 1                                            | 342.5573765 | 0.344219264  | 0.094239415 | 3.652603992  | 0.000259594 | 2.73E-02 |

|                     |         |                                                                                       |             |              |             |              |             |          |
|---------------------|---------|---------------------------------------------------------------------------------------|-------------|--------------|-------------|--------------|-------------|----------|
| ENSMUSG00000006611  | Hfe     | hemochromatosis                                                                       | 233.2512245 | 0.407642583  | 0.11167162  | 3.65036868   | 0.000261864 | 2.73E-02 |
| ENSMUSG000000025666 | Tmem47  | transmembrane protein 47                                                              | 6719.132151 | -0.216149918 | 0.059318852 | -3.643865528 | 0.000268574 | 2.79E-02 |
| ENSMUSG000000043631 | Ecm2    | extracellular matrix protein 2, female organ and adipocyte specific                   | 522.2468524 | -0.450393032 | 0.124061234 | -3.630409094 | 0.000282972 | 2.92E-02 |
| ENSMUSG00000000168  | Dlat    | dihydrolipoamide S-acetyltransferase (E2 component of pyruvate dehydrogenase complex) | 4583.776794 | 0.176427012  | 0.048640056 | 3.627195923  | 0.000286516 | 2.92E-02 |
| ENSMUSG000000052353 | Cemip   | cell migration inducing protein, hyaluronan binding                                   | 1840.025575 | -0.4649413   | 0.128287759 | -3.624206261 | 0.00028985  | 2.94E-02 |
| ENSMUSG000000010045 | Tmem115 | transmembrane protein 115                                                             | 1344.974255 | 0.214213274  | 0.059281784 | 3.613475478  | 0.00030212  | 3.02E-02 |
| ENSMUSG000000058571 | Gpc6    | glypican 6                                                                            | 1138.981461 | -0.221737078 | 0.061346601 | -3.614496551 | 0.000300932 | 3.02E-02 |
| ENSMUSG000000021998 | Lcp1    | lymphocyte cytosolic protein 1                                                        | 575.426901  | -0.33184577  | 0.091996191 | -3.607168583 | 0.000309557 | 3.06E-02 |
| ENSMUSG000000099512 | Gm28703 | predicted gene 28703                                                                  | 42.47158017 | -0.723172188 | 0.200554314 | -3.605867029 | 0.000311112 | 3.06E-02 |
| ENSMUSG000000026344 | Lypd1   | Ly6/Plaur domain containing 1                                                         | 707.8577798 | 0.357304132  | 0.099205924 | 3.601641094  | 0.000316215 | 3.09E-02 |
| ENSMUSG000000026875 | Traf1   | TNF receptor-associated factor 1                                                      | 452.7246797 | 0.445913269  | 0.123949496 | 3.597539993  | 0.000321241 | 3.12E-02 |
| ENSMUSG000000037685 | Atp8a1  | ATPase, aminophospholipid transporter (APLT), class I, type 8A, member 1              | 11419.74021 | -0.152030474 | 0.042369287 | -3.588223594 | 0.000332939 | 3.22E-02 |
| ENSMUSG000000022551 | Cyc1    | cytochrome c-1                                                                        | 5969.488864 | 0.176594951  | 0.049237771 | 3.586574833  | 0.00033505  | 3.22E-02 |
| ENSMUSG000000000881 | Dlg3    | discs large MAGUK scaffold protein 3                                                  | 5293.782134 | 0.118328055  | 0.033009058 | 3.584714728  | 0.000337447 | 3.22E-02 |
| ENSMUSG000000004187 | Kifc2   | kinesin family member C2                                                              | 8872.227272 | 0.164258912  | 0.045857095 | 3.581973822  | 0.000341008 | 3.23E-02 |
| ENSMUSG000000039252 | Lgi2    | leucine-rich repeat LGI family, member 2                                              | 6372.971886 | 0.318458404  | 0.088965961 | 3.579553376  | 0.000344182 | 3.23E-02 |
| ENSMUSG000000046574 | Prr12   | proline rich 12                                                                       | 3312.873574 | 0.150871364  | 0.042148131 | 3.579550486  | 0.000344186 | 3.23E-02 |
| ENSMUSG000000010054 | Tusc2   | tumor suppressor 2, mitochondrial calcium regulator                                   | 2502.522813 | 0.154214131  | 0.043214835 | 3.568546102  | 0.000358968 | 3.33E-02 |
| ENSMUSG000000024777 | Ppp2r5b | protein phosphatase 2, regulatory subunit B', beta                                    | 6579.099733 | 0.135258768  | 0.037954628 | 3.563696347  | 0.000365669 | 3.38E-02 |
| ENSMUSG000000063428 | Ddo     | D-aspartate oxidase                                                                   | 1482.79067  | -0.154868869 | 0.043574294 | -3.554133786 | 0.000379226 | 3.48E-02 |
| ENSMUSG000000042155 | Klhl23  | kelch-like 23                                                                         | 3422.227809 | -0.108699883 | 0.03072909  | -3.537360911 | 0.000404147 | 3.69E-02 |
| ENSMUSG000000001227 | Sema6b  | sema domain, transmembrane domain (TM), and cytoplasmic domain, (semaphorin) 6B       | 1758.165062 | 0.156707228  | 0.044407639 | 3.528834961  | 0.000417393 | 3.79E-02 |

|                    |               |                                                                      |             |              |             |              |             |          |
|--------------------|---------------|----------------------------------------------------------------------|-------------|--------------|-------------|--------------|-------------|----------|
| ENSMUSG00000037579 | Kcnh3         | potassium voltage-gated channel, subfamily H (eag-related), member 3 | 141.4872672 | 0.699261434  | 0.198678837 | 3.519556709  | 0.000432269 | 3.90E-02 |
| ENSMUSG00000039838 | Slc45a1       | solute carrier family 45, member 1                                   | 2158.860514 | 0.248713208  | 0.070876463 | 3.509108621  | 0.000449611 | 4.04E-02 |
| ENSMUSG00000029059 | Fam213b       | family with sequence similarity 213, member B                        | 1756.94047  | 0.240099039  | 0.06861156  | 3.499396293  | 0.000466313 | 4.17E-02 |
| ENSMUSG00000041695 | Kcnj2         | potassium inwardly-rectifying channel, subfamily J, member 2         | 142.9180509 | -0.457228698 | 0.130737517 | -3.497302913 | 0.000469988 | 4.18E-02 |
| ENSMUSG00000018076 | Med13l        | mediator complex subunit 13-like                                     | 5781.01772  | -0.173663194 | 0.049763156 | -3.489794661 | 0.000483392 | 4.26E-02 |
| ENSMUSG00000044134 | Pheta1        | PH domain containing endocytic trafficking adaptor 1                 | 704.7746099 | 0.237777278  | 0.068167136 | 3.48815119   | 0.000486373 | 4.26E-02 |
| ENSMUSG00000050511 | Oprd1         | opioid receptor, delta 1                                             | 20.04430459 | -1.209406991 | 0.346726523 | -3.488071752 | 0.000486517 | 4.26E-02 |
| ENSMUSG00000030092 | Cntn6         | contactin 6                                                          | 5331.154587 | -0.182682189 | 0.052415205 | -3.485289974 | 0.000491604 | 4.28E-02 |
| ENSMUSG00000032295 | Man2c1        | mannosidase, alpha, class 2C, member 1                               | 4727.558809 | 0.127253112  | 0.036673966 | 3.46984868   | 0.000520752 | 4.51E-02 |
| ENSMUSG00000023764 | Sfi1          | Sfi1 homolog, spindle assembly associated (yeast)                    | 1212.243325 | 0.224302065  | 0.064771647 | 3.462966855  | 0.000534254 | 4.59E-02 |
| ENSMUSG00000024076 | Vit           | vitrin                                                               | 66.44094499 | -0.547881353 | 0.158244454 | -3.462246786 | 0.000535686 | 4.59E-02 |
| ENSMUSG00000028150 | Rorc          | RAR-related orphan receptor gamma                                    | 2262.687714 | 0.230559859  | 0.066619632 | 3.460839586  | 0.000538494 | 4.59E-02 |
| ENSMUSG00000040651 | Fam208a       | family with sequence similarity 208, member A                        | 4400.287323 | -0.205270022 | 0.059351971 | -3.458520737 | 0.00054315  | 4.61E-02 |
| ENSMUSG00000032328 | Tmem30a       | transmembrane protein 30A                                            | 15615.31096 | -0.114504148 | 0.033143918 | -3.454755915 | 0.000550791 | 4.65E-02 |
| ENSMUSG00000109724 | Gm18194       | predicted gene 18194                                                 | 133.610084  | -0.426838601 | 0.123598131 | -3.45343896  | 0.000553488 | 4.65E-02 |
| ENSMUSG00000033862 | Cdk10         | cyclin-dependent kinase 10                                           | 1241.950755 | 0.202461754  | 0.05868709  | 3.449851619  | 0.000560895 | 4.65E-02 |
| ENSMUSG00000061046 | Haghl         | hydroxyacylglutathione hydrolase-like                                | 3351.199806 | 0.194626781  | 0.056425654 | 3.449260539  | 0.000562124 | 4.65E-02 |
| ENSMUSG00000078480 | Mrpl48-ps     | Mitochondrial ribosomal protein L48                                  | 27.58601781 | -3.250561366 | 0.94190633  | -3.451045249 | 0.00055842  | 4.65E-02 |
| ENSMUSG00000032324 | Tspan3        | tetraspanin 3                                                        | 9627.269076 | 0.132814628  | 0.03855294  | 3.44499351   | 0.000571073 | 4.70E-02 |
| ENSMUSG00000023017 | Asic1         | acid-sensing (proton-gated) ion channel 1                            | 5549.805749 | 0.176764615  | 0.051358748 | 3.441762535  | 0.000577937 | 4.73E-02 |
| ENSMUSG00000099616 | 4932413F04Rik | RIKEN cDNA 4932413F04 gene                                           | 21.90064226 | 2.125104477  | 0.619335029 | 3.43126802   | 0.000600767 | 4.89E-02 |
| ENSMUSG00000110945 | Gm9856        | predicted gene 9856                                                  | 328.9491498 | -0.365949833 | 0.106689059 | -3.4300596   | 0.000603449 | 4.89E-02 |

Supp Table S11. List of Differentially Expressed genes at FDR 5% in *Gnb5*<sup>-/-</sup> mice - hippocampus

| Ensembl ID          | Gene Symbol   | Gene name                                                           | baseMean    | log2FoldChange | lfcSE       | stat         | pvalue    | padj        |
|---------------------|---------------|---------------------------------------------------------------------|-------------|----------------|-------------|--------------|-----------|-------------|
| ENSMUSG00000032192  | Gnb5          | guanine nucleotide binding protein (G protein), beta 5              | 2382.397101 | -2.949092443   | 0.050530966 | -58.36208266 | 0.00E+00  | < 2.00E-308 |
| ENSMUSG00000023979  | Guca1b        | guanylate cyclase activator 1B                                      | 267.9709549 | 3.578006541    | 0.118457105 | 30.20508174  | 2.03E-200 | 1.96E-196   |
| ENSMUSG000000048758 | Rpl29         | ribosomal protein L29                                               | 186.1160919 | -2.54505664    | 0.14267899  | -17.83764128 | 3.61E-71  | 2.32E-67    |
| ENSMUSG00000020253  | Ppm1m         | protein phosphatase 1M                                              | 677.7813768 | -0.764173504   | 0.069114538 | -11.05662471 | 2.04E-28  | 9.82E-25    |
| ENSMUSG000000032556 | Bfsp2         | beaded filament structural protein 2, phakinin                      | 72.5712779  | -3.439485494   | 0.36690378  | -9.374352839 | 6.96E-21  | 2.68E-17    |
| ENSMUSG000000023345 | Poc1a         | POC1 centriolar protein A                                           | 290.9177971 | -0.980344264   | 0.104992395 | -9.337288312 | 9.88E-21  | 3.18E-17    |
| ENSMUSG000000032221 | Mns1          | meiosis-specific nuclear structural protein 1                       | 180.727792  | 1.133030106    | 0.149838879 | 7.56165631   | 3.98E-14  | 1.10E-10    |
| ENSMUSG000000049624 | Slc17a5       | solute carrier family 17 (anion/sugar transporter), member 5        | 1358.227186 | 0.395134078    | 0.0552683   | 7.149379957  | 8.72E-13  | 2.10E-09    |
| ENSMUSG000000032418 | Me1           | malic enzyme 1, NADP(+)-dependent, cytosolic                        | 3220.61655  | 0.35094107     | 0.049212845 | 7.131086888  | 9.96E-13  | 2.13E-09    |
| ENSMUSG000000032344 | Cgas          | cyclic GMP-AMP synthase                                             | 64.05394375 | -1.297224737   | 0.183150018 | -7.082853442 | 1.41E-12  | 2.48E-09    |
| ENSMUSG000000087466 | A330041J22Rik | RIKEN cDNA A330041J22 gene                                          | 106.9804268 | 1.041048682    | 0.146908797 | 7.086360423  | 1.38E-12  | 2.48E-09    |
| ENSMUSG000000032383 | Ppib          | peptidylprolyl isomerase B                                          | 7246.634387 | 0.323390812    | 0.046451328 | 6.961928182  | 3.36E-12  | 5.39E-09    |
| ENSMUSG000000034910 | Pygo1         | pygopus 1                                                           | 4535.707067 | 0.296843044    | 0.042829899 | 6.930743563  | 4.19E-12  | 6.21E-09    |
| ENSMUSG000000057802 | Gm10030       | predicted gene 10030                                                | 24.02046494 | -2.238670246   | 0.325437036 | -6.878965819 | 6.03E-12  | 8.31E-09    |
| ENSMUSG000000103164 | Gm38150       | predicted gene 38150                                                | 26.51357105 | 1.792662303    | 0.27409376  | 6.540325124  | 6.14E-11  | 7.89E-08    |
| ENSMUSG000000047257 | Prss45        | protease, serine 45                                                 | 29.29370674 | 2.22072601     | 0.345290573 | 6.431470148  | 1.26E-10  | 1.52E-07    |
| ENSMUSG000000042210 | Abhd14a       | abhydrolase domain containing 14A                                   | 1011.239637 | -0.395645636   | 0.062995633 | -6.280524786 | 3.37E-10  | 3.83E-07    |
| ENSMUSG000000102225 | Gm37983       | predicted gene 37983                                                | 19.23587601 | 2.053502553    | 0.328382635 | 6.253383503  | 4.02E-10  | 4.30E-07    |
| ENSMUSG000000113637 | Gm7049        | predicted gene 7049                                                 | 22.35956108 | 2.599937147    | 0.417875517 | 6.221798223  | 4.91E-10  | 4.99E-07    |
| ENSMUSG000000032498 | Mlh1          | mutL homolog 1                                                      | 473.749797  | -0.608376157   | 0.098140351 | -6.199041977 | 5.68E-10  | 5.48E-07    |
| ENSMUSG000000032349 | Elov5         | ELOVL family member 5, elongation of long chain fatty acids (yeast) | 3448.449111 | 0.266712933    | 0.043182619 | 6.176395514  | 6.56E-10  | 6.02E-07    |
| ENSMUSG000000032872 | Cyb5r4        | cytochrome b5 reductase 4                                           | 1427.463459 | -0.552583779   | 0.097467466 | -5.669417721 | 1.43E-08  | 1.26E-05    |

|                    |                |                                                                                                |             |              |             |              |          |          |
|--------------------|----------------|------------------------------------------------------------------------------------------------|-------------|--------------|-------------|--------------|----------|----------|
| ENSMUSG00000062270 | Morf4l1        | mortality factor 4 like 1                                                                      | 4261.150376 | -0.370709156 | 0.066751219 | -5.553593847 | 2.80E-08 | 2.35E-05 |
| ENSMUSG00000062270 | Morf4l1b       | mortality factor 4 like 1B                                                                     | 4261.150376 | -0.370709156 | 0.066751219 | -5.553593847 | 2.80E-08 | 2.35E-05 |
| ENSMUSG00000032232 | Cgnl1          | cingulin-like 1                                                                                | 716.6625714 | -0.674264189 | 0.126477175 | -5.331113623 | 9.76E-08 | 7.55E-05 |
| ENSMUSG00000032563 | Mrpl3          | mitochondrial ribosomal protein L3                                                             | 2653.667229 | -0.241906517 | 0.045381018 | -5.330566088 | 9.79E-08 | 7.55E-05 |
| ENSMUSG00000029471 | Camkk2         | calcium/calmodulin-dependent protein kinase kinase 2, beta                                     | 7986.908004 | 0.28842287   | 0.055844882 | 5.164714513  | 2.41E-07 | 1.79E-04 |
| ENSMUSG00000111348 | Gm19531        | predicted gene 19531                                                                           | 60.80809486 | -0.967537    | 0.190133025 | -5.088737203 | 3.60E-07 | 2.57E-04 |
| ENSMUSG00000032363 | Adamts7        | a disintegrin-like and metalloproteinase (reprolysin type) with thrombospondin type 1 motif, 7 | 60.02830454 | 1.253658417  | 0.250364087 | 5.007341231  | 5.52E-07 | 3.79E-04 |
| ENSMUSG00000034898 | Filip1         | filamin A interacting protein 1                                                                | 818.7049445 | 1.116876389  | 0.2236231   | 4.994458936  | 5.90E-07 | 3.79E-04 |
| ENSMUSG00000046186 | Cd109          | CD109 antigen                                                                                  | 440.3239799 | 0.744000787  | 0.14896346  | 4.994518707  | 5.90E-07 | 3.79E-04 |
| ENSMUSG00000032184 | Lysmd2         | LysM, putative peptidoglycan-binding, domain containing 2                                      | 1535.062665 | 0.192736213  | 0.039007063 | 4.941059295  | 7.77E-07 | 4.83E-04 |
| ENSMUSG00000032567 | Aste1          | asteroid homolog 1                                                                             | 258.6818556 | -0.411147502 | 0.08364275  | -4.915518725 | 8.85E-07 | 5.34E-04 |
| ENSMUSG00000004366 | Sst            | somatostatin                                                                                   | 4564.046349 | -0.619153137 | 0.128391349 | -4.822389825 | 1.42E-06 | 8.05E-04 |
| ENSMUSG00000086296 | D030055H07 Rik | RIKEN cDNA 030055H07 gene                                                                      | 30.05950376 | 1.958950704  | 0.408226916 | 4.798680896  | 1.60E-06 | 8.80E-04 |
| ENSMUSG00000029819 | Npy            | neuropeptide Y                                                                                 | 939.2650548 | -0.512512486 | 0.107467639 | -4.768993613 | 1.85E-06 | 9.92E-04 |
| ENSMUSG00000042208 | 0610010F05Rik  | RIKEN cDNA 0610010F05 gene                                                                     | 2105.523782 | 0.161358008  | 0.034019647 | 4.743082913  | 2.10E-06 | 1.10E-03 |
| ENSMUSG00000042073 | Abhd14b        | abhydrolase domain containing 14b                                                              | 680.5734956 | -0.292955368 | 0.061980538 | -4.726570277 | 2.28E-06 | 1.16E-03 |
| ENSMUSG00000028681 | Ptch2          | patched 2                                                                                      | 163.9075961 | 0.837619832  | 0.177967416 | 4.706590954  | 2.52E-06 | 1.21E-03 |
| ENSMUSG00000064023 | Klk8           | kallikrein related-peptidase 8                                                                 | 472.905183  | 0.558842709  | 0.118652722 | 4.709902128  | 2.48E-06 | 1.21E-03 |
| ENSMUSG00000039474 | Wfs1           | wolfram ER transmembrane glycoprotein                                                          | 6619.822236 | 0.444546447  | 0.094628776 | 4.6977935    | 2.63E-06 | 1.24E-03 |
| ENSMUSG00000021680 | Crhbp          | corticotropin releasing hormone binding protein                                                | 811.9965294 | -0.700244123 | 0.150359765 | -4.657124341 | 3.21E-06 | 1.47E-03 |
| ENSMUSG00000049303 | Syt12          | synaptotagmin XII                                                                              | 1361.722132 | 0.338352088  | 0.072743355 | 4.651312622  | 3.30E-06 | 1.48E-03 |
| ENSMUSG00000104586 | 4921539H07Rik  | RIKEN cDNA 4921539H07                                                                          | 315.8272611 | 0.702883487  | 0.151686402 | 4.633793656  | 3.59E-06 | 1.57E-03 |
| ENSMUSG00000041506 | Rrp9           | RRP9, small subunit (SSU) processome component, homolog (yeast)                                | 673.6407763 | -0.305170804 | 0.066043718 | -4.620739307 | 3.82E-06 | 1.64E-03 |

|                    |         |                                                     |             |              |             |              |          |          |
|--------------------|---------|-----------------------------------------------------|-------------|--------------|-------------|--------------|----------|----------|
| ENSMUSG00000032420 | Nt5e    | 5' nucleotidase, ecto                               | 175.8655902 | 0.583004051  | 0.126570941 | 4.606144538  | 4.10E-06 | 1.72E-03 |
| ENSMUSG00000023982 | Guca1a  | guanylate cyclase activator 1a (retina)             | 10.42051793 | 2.196823203  | 0.478445803 | 4.591582138  | 4.40E-06 | 1.81E-03 |
| ENSMUSG00000060935 | Tmem263 | transmembrane protein 263                           | 1125.137161 | 0.21083974   | 0.045978252 | 4.585640582  | 4.53E-06 | 1.82E-03 |
| ENSMUSG00000010054 | Tusc2   | tumor suppressor 2, mitochondrial calcium regulator | 2669.280548 | 0.150507457  | 0.033050594 | 4.553850268  | 5.27E-06 | 2.03E-03 |
| ENSMUSG00000016942 | Tmprss6 | transmembrane serine protease 6                     | 39.72576369 | 1.593037625  | 0.349843922 | 4.553566674  | 5.27E-06 | 2.03E-03 |
| ENSMUSG00000030966 | Trim21  | tripartite motif-containing 21                      | 113.3212122 | -0.693400583 | 0.152836079 | -4.536890679 | 5.71E-06 | 2.16E-03 |
| ENSMUSG00000030688 | Stard10 | START domain containing 10                          | 541.7897091 | -0.295630626 | 0.065426937 | -4.518484851 | 6.23E-06 | 2.31E-03 |
| ENSMUSG00000029361 | Nos1    | nitric oxide synthase 1, neuronal                   | 8256.593264 | -0.261130979 | 0.059373749 | -4.398088118 | 1.09E-05 | 3.97E-03 |
| ENSMUSG00000063297 | Luzp2   | leucine zipper protein 2                            | 6275.556935 | 0.268145569  | 0.061330761 | 4.372122009  | 1.23E-05 | 4.39E-03 |
| ENSMUSG00000032570 | Atp2c1  | ATPase, Ca++-sequestering                           | 10045.80105 | 0.188841067  | 0.043261344 | 4.365122496  | 1.27E-05 | 4.46E-03 |
| ENSMUSG00000043719 | Col6a6  | collagen, type VI, alpha 6                          | 118.7663673 | 1.69637505   | 0.390171056 | 4.347772659  | 1.38E-05 | 4.74E-03 |
| ENSMUSG00000032332 | Col12a1 | collagen, type XII, alpha 1                         | 629.8618523 | -0.433906638 | 0.100352904 | -4.32380748  | 1.53E-05 | 5.02E-03 |
| ENSMUSG00000053040 | Aph1c   | aph1 homolog C, gamma secretase subunit             | 494.1347982 | -0.311844717 | 0.072119583 | -4.323995034 | 1.53E-05 | 5.02E-03 |
| ENSMUSG00000058587 | Tmod3   | tropomodulin 3                                      | 1118.986474 | -0.281319427 | 0.065066984 | -4.323535703 | 1.54E-05 | 5.02E-03 |
| ENSMUSG00000043587 | Pxylp1  | 2-phosphoxylose phosphatase 1                       | 545.5374077 | -0.597492552 | 0.139927712 | -4.270008748 | 1.95E-05 | 6.28E-03 |
| ENSMUSG00000037089 | Slc35b2 | solute carrier family 35, member B2                 | 868.1670288 | 0.238115051  | 0.05583839  | 4.264360995  | 2.00E-05 | 6.34E-03 |
| ENSMUSG00000054204 | Alkal2  | ALK and LTK ligand 2                                | 136.1426888 | -0.81219183  | 0.191945922 | -4.231357575 | 2.32E-05 | 7.23E-03 |
| ENSMUSG00000032572 | Col6a4  | collagen, type VI, alpha 4                          | 126.9727054 | -2.511414656 | 0.595871353 | -4.214692722 | 2.50E-05 | 7.66E-03 |
| ENSMUSG00000085007 | Gm11549 | predicted gene 11549                                | 231.5328462 | 0.4463464    | 0.106199532 | 4.202903639  | 2.64E-05 | 7.94E-03 |
| ENSMUSG00000000805 | Car4    | carbonic anhydrase 4                                | 2357.367529 | 0.308419263  | 0.073606666 | 4.19009963   | 2.79E-05 | 8.27E-03 |
| ENSMUSG00000032330 | Cox7a2  | cytochrome c oxidase subunit 7A2                    | 3013.00797  | 0.125559116  | 0.030057148 | 4.177346281  | 2.95E-05 | 8.49E-03 |
| ENSMUSG00000110814 | Gm38661 | predicted gene 38661                                | 14.96083878 | -1.561989653 | 0.373750415 | -4.179231894 | 2.92E-05 | 8.49E-03 |
| ENSMUSG00000091345 | Col6a5  | collagen, type VI, alpha 5                          | 174.2352851 | 1.016652505  | 0.244067905 | 4.165449379  | 3.11E-05 | 8.81E-03 |
| ENSMUSG00000068428 | Gmnc    | geminin coiled-coil domain containing               | 264.2827313 | -0.336898445 | 0.080973307 | -4.160611156 | 3.17E-05 | 8.87E-03 |
| ENSMUSG00000024883 | Rin1    | Ras and Rab interactor 1                            | 4208.394122 | 0.206174191  | 0.049688679 | 4.149319198  | 3.33E-05 | 9.19E-03 |

|                    |               |                                                        |             |              |             |              |          |          |
|--------------------|---------------|--------------------------------------------------------|-------------|--------------|-------------|--------------|----------|----------|
| ENSMUSG00000105230 | Gm42433       | predicted gene 42433                                   | 436.7842918 | 0.246770538  | 0.059606745 | 4.139976749  | 3.47E-05 | 9.44E-03 |
| ENSMUSG00000071252 | 2210408121Rik | RIKEN cDNA 2210408121 gene                             | 389.615445  | 0.264361422  | 0.064174253 | 4.119431228  | 3.80E-05 | 1.02E-02 |
| ENSMUSG00000041923 | Nol4          | nucleolar protein 4                                    | 3286.050462 | 0.140254784  | 0.034100943 | 4.112929765  | 3.91E-05 | 1.03E-02 |
| ENSMUSG00000019947 | Arid5b        | AT rich interactive domain 5B (MRF1-like)              | 1885.967968 | -0.260157537 | 0.06335511  | -4.106338656 | 4.02E-05 | 1.03E-02 |
| ENSMUSG00000037104 | Socs5         | suppressor of cytokine signaling 5                     | 5886.68313  | 0.107574506  | 0.026251141 | 4.097898351  | 4.17E-05 | 1.06E-02 |
| ENSMUSG00000028971 | Cort          | cortistatin                                            | 67.60807817 | -0.724694391 | 0.178109095 | -4.068823039 | 4.73E-05 | 1.18E-02 |
| ENSMUSG00000010057 | Nprl2         | NPR2 like, GATOR1 complex subunit                      | 1429.63198  | 0.202997062  | 0.050049486 | 4.055927008  | 4.99E-05 | 1.23E-02 |
| ENSMUSG00000032497 | Lrrfip2       | leucine rich repeat (in FLII) interacting protein 2    | 1294.793986 | -0.201517371 | 0.049816198 | -4.045217774 | 5.23E-05 | 1.26E-02 |
| ENSMUSG00000040875 | Osbp10        | oxysterol binding protein-like 10                      | 644.5691274 | -0.352970362 | 0.087207161 | -4.047492849 | 5.18E-05 | 1.26E-02 |
| ENSMUSG00000031209 | Heph          | hephaestin                                             | 349.4145748 | -0.441492572 | 0.109271656 | -4.040321062 | 5.34E-05 | 1.27E-02 |
| ENSMUSG00000112441 | Gm48898       | predicted gene 48898                                   | 20.14550056 | 1.319734025  | 0.326804115 | 4.03830296   | 5.38E-05 | 1.27E-02 |
| ENSMUSG00000014601 | Strip1        | striatin interacting protein 1                         | 4618.315049 | 0.121491804  | 0.030263161 | 4.014511357  | 5.96E-05 | 1.37E-02 |
| ENSMUSG00000040936 | Ulk4          | unc-51-like kinase 4                                   | 201.3074905 | -0.524730265 | 0.132061386 | -3.973381479 | 7.09E-05 | 1.61E-02 |
| ENSMUSG00000038859 | Baiap2l1      | BAI1-associated protein 2-like 1                       | 49.0839138  | -1.306916288 | 0.331538163 | -3.941978429 | 8.08E-05 | 1.81E-02 |
| ENSMUSG00000016763 | Scube1        | signal peptide, CUB domain, EGF-like 1                 | 1726.279322 | 0.426222434  | 0.108205935 | 3.93899311   | 8.18E-05 | 1.81E-02 |
| ENSMUSG00000103133 | Gm37303       | predicted gene 37303                                   | 77.94310654 | 0.522106934  | 0.133550723 | 3.909427989  | 9.25E-05 | 2.03E-02 |
| ENSMUSG00000004951 | Hspb1         | heat shock protein 1                                   | 151.4367051 | -0.835319314 | 0.213951004 | -3.904255167 | 9.45E-05 | 2.05E-02 |
| ENSMUSG00000090877 | Hspa1b        | heat shock protein 1B                                  | 392.1558983 | -0.763255749 | 0.19636514  | -3.88692082  | 1.02E-04 | 2.18E-02 |
| ENSMUSG00000029462 | Vps29         | VPS29 retromer complex component                       | 3845.833264 | 0.14493881   | 0.037518194 | 3.863160675  | 1.12E-04 | 2.32E-02 |
| ENSMUSG00000042444 | Mindy2        | MINDY lysine 48 deubiquitinase 2                       | 3612.316289 | -0.152283466 | 0.039398177 | -3.865241432 | 1.11E-04 | 2.32E-02 |
| ENSMUSG00000108325 | NA            | NA                                                     | 93.73890629 | 0.5200387    | 0.134475044 | 3.867176279  | 1.10E-04 | 2.32E-02 |
| ENSMUSG00000035941 | lbtok         | inhibitor of Bruton agammaglobulinemia tyrosine kinase | 1211.17404  | -0.205862348 | 0.053432389 | -3.852763275 | 1.17E-04 | 2.40E-02 |
| ENSMUSG00000045327 | 6330549D23Rik | RIKEN cDNA 6330549D23 gene                             | 49.6841459  | -0.674934781 | 0.1754258   | -3.847408893 | 1.19E-04 | 2.42E-02 |
| ENSMUSG00000032012 | Nectin1       | nectin cell adhesion molecule 1                        | 2017.659804 | 0.237274266  | 0.061873515 | 3.834827627  | 1.26E-04 | 2.52E-02 |

|                    |         |                                                   |             |              |             |              |          |          |
|--------------------|---------|---------------------------------------------------|-------------|--------------|-------------|--------------|----------|----------|
| ENSMUSG00000051910 | Sox6    | SRY (sex determining region Y)-box 6              | 1109.249799 | -0.210449817 | 0.054915382 | -3.832256303 | 1.27E-04 | 2.52E-02 |
| ENSMUSG00000033644 | Piwil2  | piwi-like RNA-mediated gene silencing 2           | 81.66252996 | -0.533317618 | 0.139890545 | -3.812392175 | 1.38E-04 | 2.71E-02 |
| ENSMUSG00000006522 | Itih3   | inter-alpha trypsin inhibitor, heavy chain 3      | 1084.136711 | -0.295092903 | 0.078005203 | -3.782990024 | 1.55E-04 | 2.99E-02 |
| ENSMUSG00000107092 | Gm7993  | predicted gene 7993                               | 27.55659689 | 3.745229986  | 0.998444348 | 3.751065337  | 1.76E-04 | 3.36E-02 |
| ENSMUSG00000038370 | Pcp4l1  | Purkinje cell protein 4-like 1                    | 1329.318487 | -0.232791453 | 0.063060501 | -3.69155731  | 2.23E-04 | 4.17E-02 |
| ENSMUSG00000048001 | Hes5    | hes family bHLH transcription factor 5            | 210.1360801 | 0.574406535  | 0.155524959 | 3.693339899  | 2.21E-04 | 4.17E-02 |
| ENSMUSG00000051590 | Map3k19 | mitogen-activated protein kinase kinase kinase 19 | 332.5326268 | -0.512141061 | 0.138814957 | -3.689379518 | 2.25E-04 | 4.17E-02 |
| ENSMUSG00000032265 | Tent5a  | terminal nucleotidyltransferase 5A                | 327.0098402 | -0.714753787 | 0.195490594 | -3.656205511 | 2.56E-04 | 4.70E-02 |

Supp Table S12. List of Differentially Expressed genes at FDR 5% in *Gnb5*<sup>-/-</sup> mice - cerebral cortex

| Ensembl ID          | Gene Symbol | Gene name                                              | baseMean    | log2FoldChange | lfcSE       | stat         | pvalue      | padj        |
|---------------------|-------------|--------------------------------------------------------|-------------|----------------|-------------|--------------|-------------|-------------|
| ENSMUSG00000032192  | Gnb5        | guanine nucleotide binding protein (G protein), beta 5 | 3593.342841 | -3.062918872   | 0.090085387 | -34.0001745  | 2.21E-253   | 4.84E-249   |
| ENSMUSG00000023979  | Guca1b      | guanylate cyclase activator 1B                         | 263.8918466 | 3.835511755    | 0.13316811  | 28.80202898  | 2.0231E-182 | 2.209E-178  |
| ENSMUSG000000048758 | Rpl29       | ribosomal protein L29                                  | 264.164767  | -2.731697404   | 0.15217746  | -17.95073601 | 4.73586E-72 | 3.44739E-68 |
| ENSMUSG00000020253  | Ppm1m       | protein phosphatase 1M                                 | 894.8693801 | -1.212158437   | 0.086719969 | -13.97784672 | 2.1283E-44  | 1.16195E-40 |
| ENSMUSG00000032221  | Mns1        | meiosis-specific nuclear structural protein 1          | 116.3525616 | 1.634839206    | 0.147435847 | 11.08847841  | 1.42694E-28 | 6.23231E-25 |
| ENSMUSG00000023345  | Poc1a       | POC1 centriolar protein A                              | 386.6670779 | -1.089635159   | 0.121899515 | -8.938798156 | 3.93426E-19 | 1.43194E-15 |
| ENSMUSG00000032332  | Col12a1     | collagen, type XII, alpha 1                            | 887.9004528 | -0.885695463   | 0.103581894 | -8.550678424 | 1.22367E-17 | 3.8175E-14  |
| ENSMUSG00000111765  | Gm10635     | predicted gene 10635                                   | 51.20226751 | -3.314939998   | 0.393896818 | -8.415757245 | 3.90365E-17 | 1.0656E-13  |
| ENSMUSG00000111348  | Gm19531     | predicted gene 19531                                   | 101.5467041 | -1.241020024   | 0.148741013 | -8.343495822 | 7.2126E-17  | 1.7501E-13  |
| ENSMUSG00000047257  | Prss45      | protease, serine 45                                    | 34.35647461 | 2.296734155    | 0.277403272 | 8.279405412  | 1.23792E-16 | 2.70337E-13 |
| ENSMUSG00000042210  | Abhd14a     | abhydrolase domain containing 14A                      | 1032.445648 | -0.613596969   | 0.083391587 | -7.358020052 | 1.86658E-13 | 3.70567E-10 |
| ENSMUSG00000102225  | Gm37983     | predicted gene 37983                                   | 19.57885383 | 2.58186601     | 0.362084881 | 7.130554587  | 9.99653E-13 | 1.8192E-09  |
| ENSMUSG00000043719  | Col6a6      | collagen, type VI, alpha 6                             | 105.0713081 | 1.589103099    | 0.247685384 | 6.41581298   | 1.40073E-10 | 2.35302E-07 |



|                    |                |                                                                     |             |              |             |              |             |             |
|--------------------|----------------|---------------------------------------------------------------------|-------------|--------------|-------------|--------------|-------------|-------------|
| ENSMUSG00000032349 | Elov5          | ELOVL family member 5, elongation of long chain fatty acids (yeast) | 3648.481725 | 0.321846446  | 0.051309014 | 6.272707688  | 3.54823E-10 | 5.53473E-07 |
| ENSMUSG00000032418 | Me1            | malic enzyme 1, NADP(+)-dependent, cytosolic                        | 2016.009287 | 0.340643445  | 0.054688731 | 6.228768528  | 4.70116E-10 | 6.84426E-07 |
| ENSMUSG00000010044 | Zmynd10        | zinc finger, MYND domain containing 10                              | 228.8723475 | 0.730365544  | 0.120958409 | 6.038154333  | 1.55887E-09 | 1.79172E-06 |
| ENSMUSG00000032498 | Mlh1           | mutL homolog 1                                                      | 521.8321994 | -0.490752727 | 0.081153472 | -6.047217911 | 1.47368E-09 | 1.79172E-06 |
| ENSMUSG00000032872 | Cyb5r4         | cytochrome b5 reductase 4                                           | 1413.346395 | -0.564165726 | 0.093231634 | -6.051226418 | 1.43747E-09 | 1.79172E-06 |
| ENSMUSG00000087466 | A330041J22 Rik | RIKEN cDNA A330041J22 gene                                          | 81.90474134 | 1.204927988  | 0.202332849 | 5.955177308  | 2.5979E-09  | 2.83665E-06 |
| ENSMUSG00000049555 | Tmie           | transmembrane inner ear                                             | 241.8759334 | 0.63716907   | 0.114389213 | 5.570184912  | 2.54469E-08 | 2.64624E-05 |
| ENSMUSG00000032556 | Bfsp2          | beaded filament structural protein 2, phakinin                      | 85.4861346  | -2.94717596  | 0.53990551  | -5.458688424 | 4.79665E-08 | 4.63913E-05 |
| ENSMUSG00000057802 | Gm10030        | predicted gene 10030                                                | 22.31636754 | -1.9157509   | 0.351165297 | -5.45541065  | 4.88598E-08 | 4.63913E-05 |
| ENSMUSG00000062270 | Morf4l1        | mortality factor 4 like 1                                           | 3862.642941 | -0.355532571 | 0.066892551 | -5.314979978 | 1.06669E-07 | 9.706E-05   |
| ENSMUSG00000062270 | Morf4l1b       | mortality factor 4 like 1B                                          | 3862.642941 | -0.355532571 | 0.066892551 | -5.314979978 | 1.06669E-07 | 9.706E-05   |
| ENSMUSG00000103164 | Gm38150        | predicted gene 38150                                                | 23.78691025 | 1.84771035   | 0.366887132 | 5.036181944  | 4.74909E-07 | 0.000414843 |
| ENSMUSG00000032383 | Ppib           | peptidylprolyl isomerase B                                          | 6545.594919 | 0.317038174  | 0.064051057 | 4.949772724  | 7.43002E-07 | 0.000624064 |
| ENSMUSG00000059146 | Ntrk3          | neurotrophic tyrosine kinase, receptor, type 3                      | 10681.1642  | -0.195870941 | 0.040335881 | -4.855997647 | 1.19782E-06 | 0.000968816 |
| ENSMUSG00000059146 | E430016F16 Rik | RIKEN cDNA E430016F16 gene                                          | 10681.1642  | -0.195870941 | 0.040335881 | -4.855997647 | 1.19782E-06 | 0.000968816 |
| ENSMUSG00000032497 | Lrrfip2        | leucine rich repeat (in FLII) interacting protein 2                 | 1541.136996 | -0.220140185 | 0.04568305  | -4.81885913  | 1.44381E-06 | 0.001126072 |
| ENSMUSG00000109975 | Gm19196        | predicted gene 19196                                                | 76.97292567 | -0.83775478  | 0.179372068 | -4.670486274 | 3.00488E-06 | 0.002262775 |
| ENSMUSG00000097099 | Gm9917         | predicted gene 9917                                                 | 87.59711317 | -0.72766991  | 0.158976579 | -4.577214553 | 4.71208E-06 | 0.003334375 |
| ENSMUSG00000110996 | Gm36251        | predicted gene, 36251                                               | 83.08922865 | -2.301491121 | 0.502918057 | -4.576274579 | 4.73329E-06 | 0.003334375 |
| ENSMUSG00000024143 | Rhoq           | ras homolog family member Q                                         | 1994.563327 | 0.27220004   | 0.059757079 | 4.555109551  | 5.23583E-06 | 0.003573126 |
| ENSMUSG00000055125 | M5C1000I18 Rik | RIKEN cDNA M5C1000I18                                               | 169.1051477 | -0.512026751 | 0.116302137 | -4.4025567   | 1.06983E-05 | 0.007079656 |
| ENSMUSG00000043587 | Pxylp1         | 2-phosphoxylase phosphatase 1                                       | 541.0845473 | -0.522547059 | 0.12057503  | -4.333791642 | 1.46563E-05 | 0.009413649 |
| ENSMUSG00000032370 | Lactb          | lactamase, beta                                                     | 508.7191939 | -0.370527801 | 0.086670063 | -4.275153232 | 1.91006E-05 | 0.011586629 |
| ENSMUSG00000063953 | Amd2           | S-adenosylmethionine decarboxylase 2                                | 13.33707831 | 2.326043682  | 0.551895854 | 4.214642425  | 2.50174E-05 | 0.014765689 |

|                    |          |                                                                 |             |              |             |              |             |             |
|--------------------|----------|-----------------------------------------------------------------|-------------|--------------|-------------|--------------|-------------|-------------|
| ENSMUSG00000041506 | Rrp9     | RRP9, small subunit (SSU) processome component, homolog (yeast) | 741.5546544 | -0.371086466 | 0.089204231 | -4.159964852 | 3.18297E-05 | 0.018292002 |
| ENSMUSG00000034910 | Pygo1    | pygopus 1                                                       | 2350.941427 | 0.238237403  | 0.057597268 | 4.13626219   | 3.53009E-05 | 0.019766684 |
| ENSMUSG00000033208 | S100b    | S100 protein, beta polypeptide, neural                          | 4168.970089 | 0.202698353  | 0.049322006 | 4.109693985  | 3.96184E-05 | 0.021252459 |
| ENSMUSG00000042073 | Abhd14b  | abhydrolase domain containing 14b                               | 685.2510238 | -0.305729814 | 0.074452684 | -4.106363902 | 4.01936E-05 | 0.021252459 |
| ENSMUSG00000091735 | Gpr62    | G protein-coupled receptor 62                                   | 243.7985731 | 0.456204569  | 0.111202042 | 4.102483748  | 4.08739E-05 | 0.021252459 |
| ENSMUSG00000033730 | Egr3     | early growth response 3                                         | 6887.681122 | -0.476370365 | 0.117456133 | -4.055730036 | 4.9978E-05  | 0.025381829 |
| ENSMUSG00000041460 | Cacna2d4 | calcium channel, voltage-dependent, alpha 2/delta subunit 4     | 115.497014  | 0.560303026  | 0.139981496 | 4.002693509  | 6.26254E-05 | 0.031082129 |
| ENSMUSG00000039943 | Plcb4    | phospholipase C, beta 4                                         | 2966.652641 | -0.243003116 | 0.061111924 | -3.976361751 | 6.99776E-05 | 0.033959376 |
| ENSMUSG00000032184 | Lysmd2   | LysM, putative peptidoglycan-binding, domain containing 2       | 1379.081352 | 0.192652009  | 0.049069682 | 3.926090417  | 8.63377E-05 | 0.04098789  |
| ENSMUSG00000107092 | Gm7993   | predicted gene 7993                                             | 24.59807194 | 3.811634628  | 0.974363079 | 3.911924324  | 9.15636E-05 | 0.042543958 |
| ENSMUSG00000032563 | Mrpl3    | mitochondrial ribosomal protein L3                              | 2663.113172 | -0.178171707 | 0.045609773 | -3.906437045 | 9.3667E-05  | 0.042614597 |

Supp. Table S13. List of Biological Processes (BP) at FDR 5% - cerebellum

| GO ID      | Description                                    | BgRatio   | pvalue      | p.adjust    | qvalue      | geneID                                                                       | Count |
|------------|------------------------------------------------|-----------|-------------|-------------|-------------|------------------------------------------------------------------------------|-------|
| GO:0042391 | regulation of membrane potential               | 430/21092 | 7.30339E-05 | 0.164189734 | 0.156177167 | Grin2a/Dcn/Snca/Tmem108/Hcn2/Dgki/Ntrk2/Kcnk2/Tusc2/Kcnh3/Kcnj2/Oprd1/Asic1  | 13    |
| GO:0043949 | regulation of cAMP-mediated signaling          | 64/21092  | 0.000200911 | 0.164189734 | 0.156177167 | Gpr62/Pde10a/Mrap2/Gnai2/Cgas                                                | 5     |
| GO:0006865 | amino acid transport                           | 145/21092 | 0.000227254 | 0.164189734 | 0.156177167 | Slc25a29/Slc17a5/Myo6/Snca/Slc6a5/Ntrk2/Slc7a11                              | 7     |
| GO:0050808 | synapse organization                           | 427/21092 | 0.000271612 | 0.164189734 | 0.156177167 | Filip1/Camkv/Col4a5/Zfp804a/Myo6/Snca/Magi2/Tmem108/Sncb/Dctn1/Ntrk2/Slc7a11 | 12    |
| GO:0010039 | response to iron ion                           | 20/21092  | 0.000596278 | 0.288360066 | 0.274287904 | Trf/Snca/Hfe                                                                 | 3     |
| GO:0046928 | regulation of neurotransmitter secretion       | 137/21092 | 0.001064507 | 0.3155174   | 0.300119942 | Syt12/Myo6/Snca/Dgki/Ntrk2/Asic1                                             | 6     |
| GO:0006022 | aminoglycan metabolic process                  | 99/21092  | 0.00148897  | 0.3155174   | 0.300119942 | Pxylp1/Dcn/Chil5/Itih5/Cemip                                                 | 5     |
| GO:0043951 | negative regulation of cAMP-mediated signaling | 28/21092  | 0.001631142 | 0.3155174   | 0.300119942 | Pde10a/Mrap2/Gnai2                                                           | 3     |

|            |                                                                                                  |           |             |           |             |                                                                       |    |
|------------|--------------------------------------------------------------------------------------------------|-----------|-------------|-----------|-------------|-----------------------------------------------------------------------|----|
| GO:0050654 | chondroitin sulfate proteoglycan metabolic process                                               | 29/21092  | 0.0018082   | 0.3155174 | 0.300119942 | Pxylp1/Dcn/B3gat2                                                     | 3  |
| GO:0015800 | acidic amino acid transport                                                                      | 63/21092  | 0.001941813 | 0.3155174 | 0.300119942 | Myo6/Snca/Ntrk2/Slc7a11                                               | 4  |
| GO:0015711 | organic anion transport                                                                          | 404/21092 | 0.002251239 | 0.3155174 | 0.300119942 | Slc25a29/Slc17a5/Myo6/Snca/Slc6a5/Slc4a4/Ntrk2/Slc7a11/Atp8a1/Tmem30a | 10 |
| GO:0006855 | drug transmembrane transport                                                                     | 66/21092  | 0.002304207 | 0.3155174 | 0.300119942 | Slc25a29/Slc6a5/Slc7a11/Tmem30a                                       | 4  |
| GO:0051648 | vesicle localization                                                                             | 283/21092 | 0.00275487  | 0.3155174 | 0.300119942 | Myo5c/1190002N15Rik/Syt12/Myo6/Snca/Magi2/Dgki/Dctn1                  | 8  |
| GO:0098739 | import across plasma membrane                                                                    | 114/21092 | 0.002763843 | 0.3155174 | 0.300119942 | Slc6a5/Hcn2/Slc7a11/Hfe/Kcnj2                                         | 5  |
| GO:0014047 | glutamate secretion                                                                              | 34/21092  | 0.002871685 | 0.3155174 | 0.300119942 | Myo6/Snca/Ntrk2                                                       | 3  |
| GO:0007612 | learning                                                                                         | 168/21092 | 0.002988362 | 0.3155174 | 0.300119942 | Grin2a/Dgki/Ntrk2/Slc7a11/Atp8a1/Asic1                                | 6  |
| GO:0006826 | iron ion transport                                                                               | 35/21092  | 0.003121703 | 0.3155174 | 0.300119942 | Trf/Heph/Hfe                                                          | 3  |
| GO:1990089 | response to nerve growth factor                                                                  | 35/21092  | 0.003121703 | 0.3155174 | 0.300119942 | Magi2/Tmem108/Ntrk2                                                   | 3  |
| GO:1990090 | cellular response to nerve growth factor stimulus                                                | 35/21092  | 0.003121703 | 0.3155174 | 0.300119942 | Magi2/Tmem108/Ntrk2                                                   | 3  |
| GO:0043950 | positive regulation of cAMP-mediated signaling                                                   | 36/21092  | 0.003384682 | 0.3155174 | 0.300119942 | Gpr62/Mrap2/Cgas                                                      | 3  |
| GO:1902475 | L-alpha-amino acid transmembrane transport                                                       | 37/21092  | 0.003660829 | 0.3155174 | 0.300119942 | Slc25a29/Slc6a5/Slc7a11                                               | 3  |
| GO:0042983 | amyloid precursor protein biosynthetic process                                                   | 11/21092  | 0.003664453 | 0.3155174 | 0.300119942 | Necab1/Aatf                                                           | 2  |
| GO:0042984 | regulation of amyloid precursor protein biosynthetic process                                     | 11/21092  | 0.003664453 | 0.3155174 | 0.300119942 | Necab1/Aatf                                                           | 2  |
| GO:0106072 | negative regulation of adenylate cyclase-activating G protein-coupled receptor signaling pathway | 11/21092  | 0.003664453 | 0.3155174 | 0.300119942 | Mrap2/Gnai2                                                           | 2  |
| GO:0014065 | phosphatidylinositol 3-kinase signaling                                                          | 122/21092 | 0.003699283 | 0.3155174 | 0.300119942 | 1190002N15Rik/Dcn/Agap2/Nyap2/Ntrk2                                   | 5  |
| GO:1905475 | regulation of protein localization to membrane                                                   | 180/21092 | 0.004190431 | 0.3155174 | 0.300119942 | Mrap2/Magi2/Slc7a11/Cemip/Gpc6/Lypd1                                  | 6  |
| GO:0042762 | regulation of sulfur metabolic process                                                           | 12/21092  | 0.004373164 | 0.3155174 | 0.300119942 | Snca/Slc7a11                                                          | 2  |
| GO:0071281 | cellular response to iron ion                                                                    | 12/21092  | 0.004373164 | 0.3155174 | 0.300119942 | Trf/Hfe                                                               | 2  |

|            |                                                                                         |           |             |             |             |                                                            |    |
|------------|-----------------------------------------------------------------------------------------|-----------|-------------|-------------|-------------|------------------------------------------------------------|----|
| GO:0006836 | neurotransmitter transport                                                              | 306/21092 | 0.004413778 | 0.3155174   | 0.300119942 | Syt12/Myo6/Snca/Slc6a5/Dgki/Ntrk2/Slc7a11/Asic1            | 8  |
| GO:0006835 | dicarboxylic acid transport                                                             | 79/21092  | 0.004416017 | 0.3155174   | 0.300119942 | Myo6/Snca/Ntrk2/Slc7a11                                    | 4  |
| GO:0050805 | negative regulation of synaptic transmission                                            | 79/21092  | 0.004416017 | 0.3155174   | 0.300119942 | Gnai2/Snca/Dgki/Asic1                                      | 4  |
| GO:0010559 | regulation of glycoprotein biosynthetic process                                         | 40/21092  | 0.004570232 | 0.3155174   | 0.300119942 | Pxylp1/Necab1/Aatf                                         | 3  |
| GO:0001505 | regulation of neurotransmitter levels                                                   | 376/21092 | 0.004597278 | 0.3155174   | 0.300119942 | Grin2a/Syt12/Myo6/Snca/Slc6a5/Dgki/Ntrk2/Slc7a11/Asic1     | 9  |
| GO:0051588 | regulation of neurotransmitter transport                                                | 184/21092 | 0.004661041 | 0.3155174   | 0.300119942 | Syt12/Myo6/Snca/Dgki/Ntrk2/Asic1                           | 6  |
| GO:0030203 | glycosaminoglycan metabolic process                                                     | 81/21092  | 0.004827159 | 0.3155174   | 0.300119942 | Pxylp1/Dcn/Itih5/Cemip                                     | 4  |
| GO:0038179 | neurotrophin signaling pathway                                                          | 41/21092  | 0.004900965 | 0.3155174   | 0.300119942 | Magi2/Tmem108/Ppp2r5b                                      | 3  |
| GO:0009068 | aspartate family amino acid catabolic process                                           | 13/21092  | 0.005139884 | 0.3155174   | 0.300119942 | Aass/Ddo                                                   | 2  |
| GO:0042417 | dopamine metabolic process                                                              | 42/21092  | 0.005245786 | 0.3155174   | 0.300119942 | Grin2a/Snca/Sncb                                           | 3  |
| GO:0070838 | divalent metal ion transport                                                            | 457/21092 | 0.005365327 | 0.3155174   | 0.300119942 | Gnb5/Grin2a/Atp2c1/Gnai2/Snca/Ibtk/Cemip/Kcnj2/Oprd1/Asic1 | 10 |
| GO:0007269 | neurotransmitter secretion                                                              | 190/21092 | 0.005438454 | 0.3155174   | 0.300119942 | Syt12/Myo6/Snca/Dgki/Ntrk2/Asic1                           | 6  |
| GO:0099643 | signal release from synapse                                                             | 190/21092 | 0.005438454 | 0.3155174   | 0.300119942 | Syt12/Myo6/Snca/Dgki/Ntrk2/Asic1                           | 6  |
| GO:0060079 | excitatory postsynaptic potential                                                       | 84/21092  | 0.005490883 | 0.3155174   | 0.300119942 | Grin2a/Snca/Tmem108/Dgki                                   | 4  |
| GO:0072511 | divalent inorganic cation transport                                                     | 460/21092 | 0.005610938 | 0.3155174   | 0.300119942 | Gnb5/Grin2a/Atp2c1/Gnai2/Snca/Ibtk/Cemip/Kcnj2/Oprd1/Asic1 | 10 |
| GO:0060732 | positive regulation of inositol phosphate biosynthetic process                          | 14/21092  | 0.005963602 | 0.320444194 | 0.304806305 | Plcd1/Snca                                                 | 2  |
| GO:0106070 | regulation of adenylate cyclase-activating G protein-coupled receptor signaling pathway | 14/21092  | 0.005963602 | 0.320444194 | 0.304806305 | Mrap2/Gnai2                                                | 2  |
| GO:1903018 | regulation of glycoprotein metabolic process                                            | 45/21092  | 0.006366345 | 0.327535356 | 0.311551413 | Pxylp1/Necab1/Aatf                                         | 3  |
| GO:0050807 | regulation of synapse organization                                                      | 259/21092 | 0.006366485 | 0.327535356 | 0.311551413 | Camkv/Zfp804a/Snca/Magi2/Dctn1/Ntrk2/Slc7a11               | 7  |
| GO:0000041 | transition metal ion transport                                                          | 89/21092  | 0.006727861 | 0.328072847 | 0.312062675 | Trf/Atp2c1/Heph/Hfe                                        | 4  |

|            |                                                                                              |           |             |             |             |                                                      |   |
|------------|----------------------------------------------------------------------------------------------|-----------|-------------|-------------|-------------|------------------------------------------------------|---|
| GO:0010642 | negative regulation of platelet-derived growth factor receptor signaling pathway             | 15/21092  | 0.006843317 | 0.328072847 | 0.312062675 | Apod/Snca                                            | 2 |
| GO:0097286 | iron ion import                                                                              | 15/21092  | 0.006843317 | 0.328072847 | 0.312062675 | Trf/Hfe                                              | 2 |
| GO:0051650 | establishment of vesicle localization                                                        | 265/21092 | 0.00718333  | 0.328072847 | 0.312062675 | Myo5c/1190002N15Rik/Syt12/Myo6/Snca/Dgki/Dctn1       | 7 |
| GO:0001504 | neurotransmitter uptake                                                                      | 47/21092  | 0.007186592 | 0.328072847 | 0.312062675 | Snca/Slc6a5/Slc7a11                                  | 3 |
| GO:0014066 | regulation of phosphatidylinositol 3-kinase signaling                                        | 91/21092  | 0.007270244 | 0.328072847 | 0.312062675 | 1190002N15Rik/Dcn/Agap2/Ntrk2                        | 4 |
| GO:0050803 | regulation of synapse structure or activity                                                  | 266/21092 | 0.007326689 | 0.328072847 | 0.312062675 | Camkv/Zfp804a/Snca/Magi2/Dctn1/Ntrk2/Slc7a11         | 7 |
| GO:0098696 | regulation of neurotransmitter receptor localization to postsynaptic specialization membrane | 16/21092  | 0.007778044 | 0.331220927 | 0.315057127 | Magi2/Gpc6                                           | 2 |
| GO:0006816 | calcium ion transport                                                                        | 409/21092 | 0.007827052 | 0.331220927 | 0.315057127 | Gnb5/Grin2a/Atp2c1/Gnai2/Snca/lbtk/Cemip/Oprd1/Asic1 | 9 |
| GO:0048015 | phosphatidylinositol-mediated signaling                                                      | 146/21092 | 0.007844937 | 0.331220927 | 0.315057127 | 1190002N15Rik/Dcn/Agap2/Nyap2/Ntrk2                  | 5 |
| GO:0070588 | calcium ion transmembrane transport                                                          | 271/21092 | 0.008075514 | 0.331220927 | 0.315057127 | Gnb5/Grin2a/Atp2c1/Snca/lbtk/Cemip/Asic1             | 7 |
| GO:0099565 | chemical synaptic transmission, postsynaptic                                                 | 94/21092  | 0.008136677 | 0.331220927 | 0.315057127 | Grin2a/Snca/Tmem108/Dgki                             | 4 |
| GO:0046916 | cellular transition metal ion homeostasis                                                    | 95/21092  | 0.008439869 | 0.331220927 | 0.315057127 | Trf/Atp2c1/Heph/Hfe                                  | 4 |
| GO:0048017 | inositol lipid-mediated signaling                                                            | 149/21092 | 0.008525244 | 0.331220927 | 0.315057127 | 1190002N15Rik/Dcn/Agap2/Nyap2/Ntrk2                  | 5 |
| GO:0015893 | drug transport                                                                               | 210/21092 | 0.008719811 | 0.331220927 | 0.315057127 | Slc25a29/Syt12/Snca/Slc6a5/Slc7a11/Tmem30a           | 6 |
| GO:0010919 | regulation of inositol phosphate biosynthetic process                                        | 17/21092  | 0.008766807 | 0.331220927 | 0.315057127 | Plcd1/Snca                                           | 2 |
| GO:0051386 | regulation of neurotrophin TRK receptor signaling pathway                                    | 17/21092  | 0.008766807 | 0.331220927 | 0.315057127 | Tmem108/Ppp2r5b                                      | 2 |
| GO:0071248 | cellular response to metal ion                                                               | 151/21092 | 0.009000841 | 0.334046503 | 0.317744812 | Trf/Grin2a/Syt12/Snca/Hfe                            | 5 |
| GO:0007528 | neuromuscular junction development                                                           | 52/21092  | 0.009500864 | 0.334046503 | 0.317744812 | Col4a5/Dctn1/Ntrk2                                   | 3 |

|            |                                                                      |           |             |             |             |                                                 |   |
|------------|----------------------------------------------------------------------|-----------|-------------|-------------|-------------|-------------------------------------------------|---|
| GO:0006898 | receptor-mediated endocytosis                                        | 214/21092 | 0.009516311 | 0.334046503 | 0.317744812 | Trf/Myo6/Snca/Magi2/Tmem108/Hfe                 | 6 |
| GO:0099072 | regulation of postsynaptic membrane neurotransmitter receptor levels | 99/21092  | 0.009726387 | 0.334046503 | 0.317744812 | Myo6/Magi2/Gpc6/Dlg3                            | 4 |
| GO:0002710 | negative regulation of T cell mediated immunity                      | 18/21092  | 0.009808644 | 0.334046503 | 0.317744812 | Il20rb/Hfe                                      | 2 |
| GO:0010752 | regulation of cGMP-mediated signaling                                | 18/21092  | 0.009808644 | 0.334046503 | 0.317744812 | Pde10a/Cgas                                     | 2 |
| GO:0050650 | chondroitin sulfate proteoglycan biosynthetic process                | 18/21092  | 0.009808644 | 0.334046503 | 0.317744812 | Pxylp1/B3gat2                                   | 2 |
| GO:0006879 | cellular iron ion homeostasis                                        | 54/21092  | 0.010534313 | 0.353777329 | 0.336512761 | Trf/Heph/Hfe                                    | 3 |
| GO:0001975 | response to amphetamine                                              | 19/21092  | 0.010902606 | 0.355799583 | 0.338436328 | Grin2a/Asic1                                    | 2 |
| GO:0048260 | positive regulation of receptor-mediated endocytosis                 | 55/21092  | 0.011074497 | 0.355799583 | 0.338436328 | Trf/Magi2/Hfe                                   | 3 |
| GO:0014075 | response to amine                                                    | 20/21092  | 0.012047753 | 0.355799583 | 0.338436328 | Grin2a/Asic1                                    | 2 |
| GO:0006584 | catecholamine metabolic process                                      | 57/21092  | 0.012202184 | 0.355799583 | 0.338436328 | Grin2a/Snca/Sncb                                | 3 |
| GO:0009712 | catechol-containing compound metabolic process                       | 57/21092  | 0.012202184 | 0.355799583 | 0.338436328 | Grin2a/Snca/Sncb                                | 3 |
| GO:0045744 | negative regulation of G protein-coupled receptor signaling pathway  | 57/21092  | 0.012202184 | 0.355799583 | 0.338436328 | Mrap2/Gnai2/Snca                                | 3 |
| GO:1903510 | mucopolysaccharide metabolic process                                 | 57/21092  | 0.012202184 | 0.355799583 | 0.338436328 | Dcn/Itih5/Cemip                                 | 3 |
| GO:1903539 | protein localization to postsynaptic membrane                        | 57/21092  | 0.012202184 | 0.355799583 | 0.338436328 | Grin2a/Magi2/Gpc6                               | 3 |
| GO:0018958 | phenol-containing compound metabolic process                         | 106/21092 | 0.012271653 | 0.355799583 | 0.338436328 | Grin2a/Snca/Sncb/Slc7a11                        | 4 |
| GO:0016311 | dephosphorylation                                                    | 367/21092 | 0.012532008 | 0.355799583 | 0.338436328 | Ppm1m/Gnai2/Magi2/Ppm1j/Dusp7/Dlg3/Ppp2r5b/Sfi1 | 8 |
| GO:0099504 | synaptic vesicle cycle                                               | 228/21092 | 0.01271371  | 0.355799583 | 0.338436328 | Syt12/Myo6/Snca/Magi2/Sncb/Dgki                 | 6 |
| GO:0046942 | carboxylic acid transport                                            | 297/21092 | 0.012907908 | 0.355799583 | 0.338436328 | Slc25a29/Slc17a5/Myo6/Snca/Slc6a5/Ntrk2/Slc7a11 | 7 |
| GO:0015849 | organic acid transport                                               | 298/21092 | 0.013127784 | 0.355799583 | 0.338436328 | Slc25a29/Slc17a5/Myo6/Snca/Slc6a5/Ntrk2/Slc7a11 | 7 |

|            |                                                                     |           |             |             |             |                                                             |   |
|------------|---------------------------------------------------------------------|-----------|-------------|-------------|-------------|-------------------------------------------------------------|---|
| GO:0003433 | chondrocyte development involved in endochondral bone morphogenesis | 21/21092  | 0.013243161 | 0.355799583 | 0.338436328 | Poc1a/Vit                                                   | 2 |
| GO:0095500 | acetylcholine receptor signaling pathway                            | 21/21092  | 0.013243161 | 0.355799583 | 0.338436328 | Gnai2/Lypd1                                                 | 2 |
| GO:1903831 | signal transduction involved in cellular response to ammonium ion   | 21/21092  | 0.013243161 | 0.355799583 | 0.338436328 | Gnai2/Lypd1                                                 | 2 |
| GO:1905144 | response to acetylcholine                                           | 21/21092  | 0.013243161 | 0.355799583 | 0.338436328 | Gnai2/Lypd1                                                 | 2 |
| GO:1905145 | cellular response to acetylcholine                                  | 21/21092  | 0.013243161 | 0.355799583 | 0.338436328 | Gnai2/Lypd1                                                 | 2 |
| GO:0015807 | L-amino acid transport                                              | 59/21092  | 0.013393424 | 0.355882404 | 0.338515107 | Slc25a29/Slc6a5/Slc7a11                                     | 3 |
| GO:0060078 | regulation of postsynaptic membrane potential                       | 111/21092 | 0.014328207 | 0.368755538 | 0.350760024 | Grin2a/Snca/Tmem108/Dgki                                    | 4 |
| GO:0003418 | growth plate cartilage chondrocyte differentiation                  | 22/21092  | 0.014487914 | 0.368755538 | 0.350760024 | Poc1a/Vit                                                   | 2 |
| GO:0015874 | norepinephrine transport                                            | 22/21092  | 0.014487914 | 0.368755538 | 0.350760024 | Plcd1/Snca                                                  | 2 |
| GO:1902683 | regulation of receptor localization to synapse                      | 22/21092  | 0.014487914 | 0.368755538 | 0.350760024 | Magi2/Gpc6                                                  | 2 |
| GO:0015672 | monovalent inorganic cation transport                               | 458/21092 | 0.015501344 | 0.378545307 | 0.360072046 | Atp6v1g2/Kcnk9/Slc4a4/Hcn2/Kcnk2/Cyc1/Kcnh3/Kcnj2/Asic1     | 9 |
| GO:1903828 | negative regulation of cellular protein localization                | 114/21092 | 0.015660773 | 0.378545307 | 0.360072046 | Dclk3/Mrap2/Apod/Lypd1                                      | 4 |
| GO:1903077 | negative regulation of protein localization to plasma membrane      | 23/21092  | 0.015781111 | 0.378545307 | 0.360072046 | Mrap2/Lypd1                                                 | 2 |
| GO:0006801 | superoxide metabolic process                                        | 63/21092  | 0.015968412 | 0.378545307 | 0.360072046 | Cyb5r4/Aatf/Gnai2                                           | 3 |
| GO:0030330 | DNA damage response, signal transduction by p53 class mediator      | 63/21092  | 0.015968412 | 0.378545307 | 0.360072046 | Pcbp4/Myo6/E2f7                                             | 3 |
| GO:0042440 | pigment metabolic process                                           | 63/21092  | 0.015968412 | 0.378545307 | 0.360072046 | Cyb5r4/Alas1/Slc7a11                                        | 3 |
| GO:0043113 | receptor clustering                                                 | 63/21092  | 0.015968412 | 0.378545307 | 0.360072046 | Magi2/Slc7a11/Dlg3                                          | 3 |
| GO:0031346 | positive regulation of cell projection organization                 | 462/21092 | 0.016310554 | 0.379822529 | 0.361286939 | Twf2/Mns1/Zfp804a/Magi2/Ntrk2/Metrrn/Efemp1/Ppp2r5b/Tmem30a | 9 |
| GO:0006470 | protein dephosphorylation                                           | 242/21092 | 0.016599944 | 0.379822529 | 0.361286939 | Ppm1m/Gnai2/Magi2/Ppm1j/Dusp7/Ppp2r5b                       | 6 |

|            |                                                                         |           |             |             |             |                                      |   |
|------------|-------------------------------------------------------------------------|-----------|-------------|-------------|-------------|--------------------------------------|---|
| GO:0010640 | regulation of platelet-derived growth factor receptor signaling pathway | 24/21092  | 0.017121859 | 0.379822529 | 0.361286939 | Apod/Snca                            | 2 |
| GO:0032928 | regulation of superoxide anion generation                               | 24/21092  | 0.017121859 | 0.379822529 | 0.361286939 | Aatf/Gnai2                           | 2 |
| GO:0035384 | thioester biosynthetic process                                          | 24/21092  | 0.017121859 | 0.379822529 | 0.361286939 | Snca/Dlat                            | 2 |
| GO:0071616 | acyl-CoA biosynthetic process                                           | 24/21092  | 0.017121859 | 0.379822529 | 0.361286939 | Snca/Dlat                            | 2 |
| GO:0098810 | neurotransmitter reuptake                                               | 24/21092  | 0.017121859 | 0.379822529 | 0.361286939 | Snca/Slc6a5                          | 2 |
| GO:0051193 | regulation of cofactor metabolic process                                | 65/21092  | 0.017352887 | 0.381448013 | 0.362833097 | Me1/Snca/Slc7a11                     | 3 |
| GO:0019933 | cAMP-mediated signaling                                                 | 179/21092 | 0.017689275 | 0.385339341 | 0.366534526 | Gpr62/Pde10a/Mrap2/Gnai2/Cgas        | 5 |
| GO:0099010 | modification of postsynaptic structure                                  | 25/21092  | 0.01850928  | 0.38858238  | 0.369619302 | Filip1/Camkv                         | 2 |
| GO:0120033 | negative regulation of plasma membrane bounded cell projection assembly | 25/21092  | 0.01850928  | 0.38858238  | 0.369619302 | Slit2/Cdk10                          | 2 |
| GO:1902473 | regulation of protein localization to synapse                           | 25/21092  | 0.01850928  | 0.38858238  | 0.369619302 | Magi2/Gpc6                           | 2 |
| GO:1904376 | negative regulation of protein localization to cell periphery           | 25/21092  | 0.01850928  | 0.38858238  | 0.369619302 | Mrap2/Lypd1                          | 2 |
| GO:0006029 | proteoglycan metabolic process                                          | 67/21092  | 0.018802373 | 0.38858238  | 0.369619302 | Pxylp1/Dcn/B3gat2                    | 3 |
| GO:0014068 | positive regulation of phosphatidylinositol 3-kinase signaling          | 67/21092  | 0.018802373 | 0.38858238  | 0.369619302 | Dcn/Agap2/Ntrk2                      | 3 |
| GO:0051668 | localization within membrane                                            | 183/21092 | 0.019265243 | 0.394676759 | 0.375416272 | Myo6/Magi2/Slc7a11/Gpc6/Dlg3         | 5 |
| GO:0048168 | regulation of neuronal synaptic plasticity                              | 68/21092  | 0.019551554 | 0.394676759 | 0.375416272 | Grin2a/Rasgrf1/Snca                  | 3 |
| GO:0010921 | regulation of phosphatase activity                                      | 122/21092 | 0.019586936 | 0.394676759 | 0.375416272 | Gnai2/Magi2/Dlg3/Sfi1                | 4 |
| GO:0030212 | hyaluronan metabolic process                                            | 26/21092  | 0.019942505 | 0.395253915 | 0.375965263 | Itih5/Cemip                          | 2 |
| GO:0045332 | phospholipid translocation                                              | 26/21092  | 0.019942505 | 0.395253915 | 0.375965263 | Atp8a1/Tmem30a                       | 2 |
| GO:0031589 | cell-substrate adhesion                                                 | 325/21092 | 0.020133669 | 0.395798462 | 0.376483235 | Rpl29/Tdgf1/Apod/Sned1/Spp1/Ecm2/Vit | 7 |
| GO:0010811 | positive regulation of cell-substrate adhesion                          | 125/21092 | 0.021202155 | 0.402000363 | 0.382382479 | Tdgf1/Spp1/Ecm2/Vit                  | 4 |



|            |                                                                         |           |             |             |             |                                           |   |
|------------|-------------------------------------------------------------------------|-----------|-------------|-------------|-------------|-------------------------------------------|---|
| GO:0006026 | aminoglycan catabolic process                                           | 27/21092  | 0.021420677 | 0.402000363 | 0.382382479 | Chil5/Cemip                               | 2 |
| GO:0034204 | lipid translocation                                                     | 27/21092  | 0.021420677 | 0.402000363 | 0.382382479 | Atp8a1/Tmem30a                            | 2 |
| GO:1902932 | positive regulation of alcohol biosynthetic process                     | 27/21092  | 0.021420677 | 0.402000363 | 0.382382479 | Plcd1/Snca                                | 2 |
| GO:0007631 | feeding behavior                                                        | 126/21092 | 0.021758176 | 0.402000363 | 0.382382479 | Hcrr2/Mrap2/Ntrk2/Oprd1                   | 4 |
| GO:0050433 | regulation of catecholamine secretion                                   | 71/21092  | 0.021897022 | 0.402000363 | 0.382382479 | Plcd1/Syt12/Snca                          | 3 |
| GO:0097120 | receptor localization to synapse                                        | 71/21092  | 0.021897022 | 0.402000363 | 0.382382479 | Magi2/Gpc6/Dlg3                           | 3 |
| GO:0042177 | negative regulation of protein catabolic process                        | 127/21092 | 0.022323059 | 0.402000363 | 0.382382479 | Grin2a/Agap2/Snca/Hfe                     | 4 |
| GO:0097553 | calcium ion transmembrane import into cytosol                           | 127/21092 | 0.022323059 | 0.402000363 | 0.382382479 | Grin2a/Snca/Ibtk/Cemip                    | 4 |
| GO:0010959 | regulation of metal ion transport                                       | 410/21092 | 0.022737662 | 0.402000363 | 0.382382479 | Gnb5/Trf/Gnai2/Snca/Hfe/Cemip/Kcnj2/Oprd1 | 8 |
| GO:0003413 | chondrocyte differentiation involved in endochondral bone morphogenesis | 28/21092  | 0.022942949 | 0.402000363 | 0.382382479 | Poc1a/Vit                                 | 2 |
| GO:0045780 | positive regulation of bone resorption                                  | 28/21092  | 0.022942949 | 0.402000363 | 0.382382479 | Trf/Spp1                                  | 2 |
| GO:0046852 | positive regulation of bone remodeling                                  | 28/21092  | 0.022942949 | 0.402000363 | 0.382382479 | Trf/Spp1                                  | 2 |
| GO:0089718 | amino acid import across plasma membrane                                | 28/21092  | 0.022942949 | 0.402000363 | 0.382382479 | Slc6a5/Slc7a11                            | 2 |
| GO:1902668 | negative regulation of axon guidance                                    | 28/21092  | 0.022942949 | 0.402000363 | 0.382382479 | Slit2/Sema6b                              | 2 |
| GO:0097479 | synaptic vesicle localization                                           | 192/21092 | 0.023141781 | 0.402567096 | 0.382921555 | Syt12/Myo6/Snca/Magi2/Dgki                | 5 |
| GO:0071804 | cellular potassium ion transport                                        | 193/21092 | 0.023601378 | 0.40313958  | 0.383466102 | Kcnk9/Hcn2/Kcnk2/Kcnh3/Kcnj2              | 5 |
| GO:0071805 | potassium ion transmembrane transport                                   | 193/21092 | 0.023601378 | 0.40313958  | 0.383466102 | Kcnk9/Hcn2/Kcnk2/Kcnh3/Kcnj2              | 5 |
| GO:0055076 | transition metal ion homeostasis                                        | 130/21092 | 0.024071178 | 0.40313958  | 0.383466102 | Trf/Atp2c1/Heph/Hfe                       | 4 |
| GO:0003333 | amino acid transmembrane transport                                      | 74/21092  | 0.024389498 | 0.40313958  | 0.383466102 | Slc25a29/Slc6a5/Slc7a11                   | 3 |
| GO:0032272 | negative regulation of protein polymerization                           | 74/21092  | 0.024389498 | 0.40313958  | 0.383466102 | Twf2/Snca/Slit2                           | 3 |
| GO:0050432 | catecholamine secretion                                                 | 74/21092  | 0.024389498 | 0.40313958  | 0.383466102 | Plcd1/Syt12/Snca                          | 3 |

|            |                                                                                |           |             |             |             |                                           |   |
|------------|--------------------------------------------------------------------------------|-----------|-------------|-------------|-------------|-------------------------------------------|---|
| GO:0042168 | heme metabolic process                                                         | 29/21092  | 0.024508486 | 0.40313958  | 0.383466102 | Cyb5r4/Alas1                              | 2 |
| GO:0051589 | negative regulation of neurotransmitter transport                              | 29/21092  | 0.024508486 | 0.40313958  | 0.383466102 | Snca/Asic1                                | 2 |
| GO:0051881 | regulation of mitochondrial membrane potential                                 | 75/21092  | 0.025252981 | 0.412579103 | 0.392444969 | Dcn/Tusc2/Oprd1                           | 3 |
| GO:0043112 | receptor metabolic process                                                     | 198/21092 | 0.025987788 | 0.417990687 | 0.397592465 | Myo6/Snca/Magi2/Pik3r4/Pheta1             | 5 |
| GO:0010038 | response to metal ion                                                          | 269/21092 | 0.026268205 | 0.417990687 | 0.397592465 | Trf/Grin2a/Plcd1/Syt12/Snca/Hfe           | 6 |
| GO:0090287 | regulation of cellular response to growth factor stimulus                      | 269/21092 | 0.026268205 | 0.417990687 | 0.397592465 | TdGF1/Dcn/Tmem108/Slit2/Bcl9l/Ppp2r5b     | 6 |
| GO:1904375 | regulation of protein localization to cell periphery                           | 134/21092 | 0.0265278   | 0.417990687 | 0.397592465 | Mrap2/Magi2/Gpc6/Lypd1                    | 4 |
| GO:0044272 | sulfur compound biosynthetic process                                           | 77/21092  | 0.027028868 | 0.417990687 | 0.397592465 | Snca/Slc7a11/Dlat                         | 3 |
| GO:0032958 | inositol phosphate biosynthetic process                                        | 31/21092  | 0.027766067 | 0.417990687 | 0.397592465 | Plcd1/Snca                                | 2 |
| GO:0045920 | negative regulation of exocytosis                                              | 31/21092  | 0.027766067 | 0.417990687 | 0.397592465 | Gnai2/Snca                                | 2 |
| GO:0099563 | modification of synaptic structure                                             | 31/21092  | 0.027766067 | 0.417990687 | 0.397592465 | Filip1/Camkv                              | 2 |
| GO:0099633 | protein localization to postsynaptic specialization membrane                   | 31/21092  | 0.027766067 | 0.417990687 | 0.397592465 | Magi2/Gpc6                                | 2 |
| GO:0099645 | neurotransmitter receptor localization to postsynaptic specialization membrane | 31/21092  | 0.027766067 | 0.417990687 | 0.397592465 | Magi2/Gpc6                                | 2 |
| GO:1905476 | negative regulation of protein localization to membrane                        | 31/21092  | 0.027766067 | 0.417990687 | 0.397592465 | Mrap2/Lypd1                               | 2 |
| GO:0048167 | regulation of synaptic plasticity                                              | 348/21092 | 0.027881899 | 0.417990687 | 0.397592465 | Grin2a/Rasgrf1/Syt12/Myo6/Snca/Dgki/Ntrk2 | 7 |
| GO:0010923 | negative regulation of phosphatase activity                                    | 78/21092  | 0.027941239 | 0.417990687 | 0.397592465 | Gnai2/Dlg3/Sfi1                           | 3 |
| GO:0050770 | regulation of axonogenesis                                                     | 202/21092 | 0.028004339 | 0.417990687 | 0.397592465 | Twf2/Ntrk2/Metrn/Slit2/Sema6b             | 5 |
| GO:0043090 | amino acid import                                                              | 32/21092  | 0.029456493 | 0.434303664 | 0.413109358 | Slc6a5/Slc7a11                            | 2 |
| GO:0048011 | neurotrophin TRK receptor signaling pathway                                    | 32/21092  | 0.029456493 | 0.434303664 | 0.413109358 | Tmem108/Ppp2r5b                           | 2 |

|            |                                                                    |           |             |             |             |                                                |   |
|------------|--------------------------------------------------------------------|-----------|-------------|-------------|-------------|------------------------------------------------|---|
| GO:0098659 | inorganic cation import across plasma membrane                     | 81/21092  | 0.030775784 | 0.438771595 | 0.417359251 | Hcn2/Hfe/Kcnj2                                 | 3 |
| GO:0099587 | inorganic ion import across plasma membrane                        | 81/21092  | 0.030775784 | 0.438771595 | 0.417359251 | Hcn2/Hfe/Kcnj2                                 | 3 |
| GO:0031333 | negative regulation of protein complex assembly                    | 141/21092 | 0.031176982 | 0.438771595 | 0.417359251 | Twf2/Snca/Slit2/Oprd1                          | 4 |
| GO:0090288 | negative regulation of cellular response to growth factor stimulus | 141/21092 | 0.031176982 | 0.438771595 | 0.417359251 | TdGF1/Dcn/Slit2/Bcl9l                          | 4 |
| GO:0032733 | positive regulation of interleukin-10 production                   | 33/21092  | 0.03118695  | 0.438771595 | 0.417359251 | Il20rb/Tusc2                                   | 2 |
| GO:0042554 | superoxide anion generation                                        | 33/21092  | 0.03118695  | 0.438771595 | 0.417359251 | Aatf/Gnai2                                     | 2 |
| GO:1900181 | negative regulation of protein localization to nucleus             | 33/21092  | 0.03118695  | 0.438771595 | 0.417359251 | DclK3/Apod                                     | 2 |
| GO:0010810 | regulation of cell-substrate adhesion                              | 208/21092 | 0.031211214 | 0.438771595 | 0.417359251 | TdGF1/Apod/Spp1/Ecm2/Vit                       | 5 |
| GO:0010976 | positive regulation of neuron projection development               | 357/21092 | 0.031400012 | 0.438874154 | 0.417456805 | Twf2/Zfp804a/Magi2/Ntrk2/Metrn/Ppp2r5b/Tmem30a | 7 |
| GO:0007611 | learning or memory                                                 | 283/21092 | 0.032509909 | 0.445191004 | 0.423465388 | Grin2a/Dgki/Ntrk2/Slc7a11/Atp8a1/Asic1         | 6 |
| GO:0019935 | cyclic-nucleotide-mediated signaling                               | 211/21092 | 0.032897621 | 0.445191004 | 0.423465388 | Gpr62/Pde10a/Mrap2/Gnai2/Cgas                  | 5 |
| GO:0007271 | synaptic transmission, cholinergic                                 | 34/21092  | 0.032956654 | 0.445191004 | 0.423465388 | Lama2/Lypd1                                    | 2 |
| GO:0010737 | protein kinase A signaling                                         | 34/21092  | 0.032956654 | 0.445191004 | 0.423465388 | Pde10a/Lcp1                                    | 2 |
| GO:0090322 | regulation of superoxide metabolic process                         | 34/21092  | 0.032956654 | 0.445191004 | 0.423465388 | Aatf/Gnai2                                     | 2 |
| GO:0097366 | response to bronchodilator                                         | 34/21092  | 0.032956654 | 0.445191004 | 0.423465388 | Grin2a/Asic1                                   | 2 |
| GO:0010591 | regulation of lamellipodium assembly                               | 35/21092  | 0.034764833 | 0.459351728 | 0.43693506  | Twf2/Slit2                                     | 2 |
| GO:0033866 | nucleoside bisphosphate biosynthetic process                       | 35/21092  | 0.034764833 | 0.459351728 | 0.43693506  | Snca/Dlat                                      | 2 |
| GO:0034030 | ribonucleoside bisphosphate biosynthetic process                   | 35/21092  | 0.034764833 | 0.459351728 | 0.43693506  | Snca/Dlat                                      | 2 |
| GO:0034033 | purine nucleoside bisphosphate biosynthetic process                | 35/21092  | 0.034764833 | 0.459351728 | 0.43693506  | Snca/Dlat                                      | 2 |
| GO:0042490 | mechanoreceptor differentiation                                    | 86/21092  | 0.035822894 | 0.460779532 | 0.438293186 | Myo6/Cthrc1/Ntrk2                              | 3 |

|            |                                                                    |           |             |             |             |                                                   |   |
|------------|--------------------------------------------------------------------|-----------|-------------|-------------|-------------|---------------------------------------------------|---|
| GO:0060402 | calcium ion transport into cytosol                                 | 148/21092 | 0.036276764 | 0.460779532 | 0.438293186 | Grin2a/Snca/Ibtk/Cemip                            | 4 |
| GO:0071241 | cellular response to inorganic substance                           | 217/21092 | 0.036438489 | 0.460779532 | 0.438293186 | Trf/Grin2a/Syt12/Snca/Hfe                         | 5 |
| GO:0003417 | growth plate cartilage development                                 | 36/21092  | 0.036610724 | 0.460779532 | 0.438293186 | Poc1a/Vit                                         | 2 |
| GO:0006739 | NADP metabolic process                                             | 36/21092  | 0.036610724 | 0.460779532 | 0.438293186 | Me1/Cyb5r4                                        | 2 |
| GO:0033238 | regulation of cellular amine metabolic process                     | 36/21092  | 0.036610724 | 0.460779532 | 0.438293186 | Snca/Slc7a11                                      | 2 |
| GO:0050919 | negative chemotaxis                                                | 36/21092  | 0.036610724 | 0.460779532 | 0.438293186 | Slit2/Sema6b                                      | 2 |
| GO:0051181 | cofactor transport                                                 | 36/21092  | 0.036610724 | 0.460779532 | 0.438293186 | Slc25a29/Slc7a11                                  | 2 |
| GO:0072524 | pyridine-containing compound metabolic process                     | 149/21092 | 0.037042323 | 0.460779532 | 0.438293186 | Me1/Cyb5r4/Pnpo/Dlat                              | 4 |
| GO:1901615 | organic hydroxy compound metabolic process                         | 453/21092 | 0.037758467 | 0.460779532 | 0.438293186 | Grin2a/Pnpo/Plcd1/Snca/Sncb/Cyp11a1/Slc7a11/Haghl | 8 |
| GO:0042737 | drug catabolic process                                             | 150/21092 | 0.037817159 | 0.460779532 | 0.438293186 | Aass/Snca/Chil5/Ctsh                              | 4 |
| GO:0035418 | protein localization to synapse                                    | 88/21092  | 0.037953804 | 0.460779532 | 0.438293186 | Grin2a/Magi2/Gpc6                                 | 3 |
| GO:0055072 | iron ion homeostasis                                               | 88/21092  | 0.037953804 | 0.460779532 | 0.438293186 | Trf/Heph/Hfe                                      | 3 |
| GO:0006778 | porphyrin-containing compound metabolic process                    | 37/21092  | 0.038493575 | 0.460779532 | 0.438293186 | Cyb5r4/Alas1                                      | 2 |
| GO:0009311 | oligosaccharide metabolic process                                  | 37/21092  | 0.038493575 | 0.460779532 | 0.438293186 | B3galt1/Man2c1                                    | 2 |
| GO:0032620 | interleukin-17 production                                          | 37/21092  | 0.038493575 | 0.460779532 | 0.438293186 | Tusc2/Rorc                                        | 2 |
| GO:0048169 | regulation of long-term neuronal synaptic plasticity               | 37/21092  | 0.038493575 | 0.460779532 | 0.438293186 | Grin2a/Snca                                       | 2 |
| GO:0048846 | axon extension involved in axon guidance                           | 37/21092  | 0.038493575 | 0.460779532 | 0.438293186 | Slit2/Sema6b                                      | 2 |
| GO:1902284 | neuron projection extension involved in neuron projection guidance | 37/21092  | 0.038493575 | 0.460779532 | 0.438293186 | Slit2/Sema6b                                      | 2 |
| GO:0019318 | hexose metabolic process                                           | 221/21092 | 0.03892471  | 0.462775342 | 0.440191599 | Apod/Glb1/Dlat/Man2c1/Rorc                        | 5 |
| GO:0051937 | catecholamine transport                                            | 89/21092  | 0.039043081 | 0.462775342 | 0.440191599 | Plcd1/Syt12/Snca                                  | 3 |

|            |                                                                                                                                                  |           |             |             |             |                                                |   |
|------------|--------------------------------------------------------------------------------------------------------------------------------------------------|-----------|-------------|-------------|-------------|------------------------------------------------|---|
| GO:0042770 | signal transduction in response to DNA damage                                                                                                    | 90/21092  | 0.040148167 | 0.47355253  | 0.450442853 | Pcbp4/Myo6/E2f7                                | 3 |
| GO:0002686 | negative regulation of leukocyte migration                                                                                                       | 38/21092  | 0.040412644 | 0.474358121 | 0.45120913  | Apod/Slit2                                     | 2 |
| GO:0035305 | negative regulation of dephosphorylation                                                                                                         | 91/21092  | 0.041269006 | 0.482069834 | 0.458544507 | Gnai2/Dlg3/Sfi1                                | 3 |
| GO:0001881 | receptor recycling                                                                                                                               | 39/21092  | 0.042367197 | 0.484971177 | 0.461304263 | Snca/Pheta1                                    | 2 |
| GO:0002823 | negative regulation of adaptive immune response based on somatic recombination of immune receptors built from immunoglobulin superfamily domains | 39/21092  | 0.042367197 | 0.484971177 | 0.461304263 | Il20rb/Hfe                                     | 2 |
| GO:0019934 | cGMP-mediated signaling                                                                                                                          | 39/21092  | 0.042367197 | 0.484971177 | 0.461304263 | Pde10a/Cgas                                    | 2 |
| GO:0045807 | positive regulation of endocytosis                                                                                                               | 157/21092 | 0.043501024 | 0.484971177 | 0.461304263 | Trf/Snca/Magi2/Hfe                             | 4 |
| GO:0051188 | cofactor biosynthetic process                                                                                                                    | 228/21092 | 0.043519857 | 0.484971177 | 0.461304263 | Pnpo/Snca/Alas1/Slc7a11/Dlat                   | 5 |
| GO:0033674 | positive regulation of kinase activity                                                                                                           | 467/21092 | 0.043822185 | 0.484971177 | 0.461304263 | Tdgf1/Trf/Map3k19/Agap2/Snca/Pik3r4/Cemip/Dlg3 | 8 |
| GO:1990573 | potassium ion import across plasma membrane                                                                                                      | 40/21092  | 0.044356511 | 0.484971177 | 0.461304263 | Hcn2/Kcnj2                                     | 2 |
| GO:0009100 | glycoprotein metabolic process                                                                                                                   | 308/21092 | 0.045902873 | 0.484971177 | 0.461304263 | Pxylp1/Necab1/Dcn/B3gat2/Aatf/B3galt1          | 6 |
| GO:0044282 | small molecule catabolic process                                                                                                                 | 308/21092 | 0.045902873 | 0.484971177 | 0.461304263 | Acad11/Aass/Glb1/Cemip/Ddo/Haghl               | 6 |
| GO:0007200 | phospholipase C-activating G protein-coupled receptor signaling pathway                                                                          | 95/21092  | 0.045908647 | 0.484971177 | 0.461304263 | Hctr2/Plcd1/Oprd1                              | 3 |
| GO:0060359 | response to ammonium ion                                                                                                                         | 95/21092  | 0.045908647 | 0.484971177 | 0.461304263 | Gnai2/Snca/Lypd1                               | 3 |
| GO:0060401 | cytosolic calcium ion transport                                                                                                                  | 160/21092 | 0.04607626  | 0.484971177 | 0.461304263 | Grin2a/Snca/Ibtk/Cemip                         | 4 |
| GO:0034105 | positive regulation of tissue remodeling                                                                                                         | 41/21092  | 0.046379872 | 0.484971177 | 0.461304263 | Trf/Spp1                                       | 2 |
| GO:0051281 | positive regulation of release of sequestered calcium ion into cytosol                                                                           | 41/21092  | 0.046379872 | 0.484971177 | 0.461304263 | Snca/Cemip                                     | 2 |
| GO:0043648 | dicarboxylic acid metabolic process                                                                                                              | 96/21092  | 0.047107301 | 0.484971177 | 0.461304263 | Me1/Slc7a11/Ddo                                | 3 |
| GO:0006813 | potassium ion transport                                                                                                                          | 234/21092 | 0.047707806 | 0.484971177 | 0.461304263 | Kcnk9/Hcn2/Kcnk2/Kcnh3/Kcnj2                   | 5 |

|            |                                                 |           |             |             |             |                                                     |   |
|------------|-------------------------------------------------|-----------|-------------|-------------|-------------|-----------------------------------------------------|---|
| GO:1901215 | negative regulation of neuron death             | 234/21092 | 0.047707806 | 0.484971177 | 0.461304263 | Agap2/Snca/Sncb/Ntrk2/Slc7a11                       | 5 |
| GO:0006732 | coenzyme metabolic process                      | 311/21092 | 0.047709981 | 0.484971177 | 0.461304263 | Me1/Cyb5r4/Pnpo/Snca/Folh1/Dlat                     | 6 |
| GO:0051656 | establishment of organelle localization         | 476/21092 | 0.048042656 | 0.484971177 | 0.461304263 | Mlh1/Myo5c/1190002N15Rik/Syt12/Myo6/Snca/Dgki/Dctn1 | 8 |
| GO:0006140 | regulation of nucleotide metabolic process      | 97/21092  | 0.048321314 | 0.484971177 | 0.461304263 | Guca1b/Me1/Snca                                     | 3 |
| GO:0002820 | negative regulation of adaptive immune response | 42/21092  | 0.048436576 | 0.484971177 | 0.461304263 | Il20rb/Hfe                                          | 2 |
| GO:0009066 | aspartate family amino acid metabolic process   | 42/21092  | 0.048436576 | 0.484971177 | 0.461304263 | Aass/Ddo                                            | 2 |
| GO:0031644 | regulation of neurological system process       | 163/21092 | 0.048734935 | 0.484971177 | 0.461304263 | Trf/Grin2a/Tmem108/Oprd1                            | 4 |
| GO:0035303 | regulation of dephosphorylation                 | 163/21092 | 0.048734935 | 0.484971177 | 0.461304263 | Gnai2/Magi2/Dlg3/Sfi1                               | 4 |
| GO:0051186 | cofactor metabolic process                      | 478/21092 | 0.049015382 | 0.484971177 | 0.461304263 | Me1/Cyb5r4/Pnpo/Snca/Alas1/Slc7a11/Folh1/Dlat       | 8 |
| GO:0050772 | positive regulation of axonogenesis             | 98/21092  | 0.049550611 | 0.484971177 | 0.461304263 | Twf2/Ntrk2/Metrn                                    | 3 |

Supp. Table S14. List of Biological Processes (BP) at FDR 5% - hippocampus

| GO ID      | Description                                       | BgRatio   | pvalue      | p.adjust    | qvalue      | geneID                                | Count |
|------------|---------------------------------------------------|-----------|-------------|-------------|-------------|---------------------------------------|-------|
| GO:0031282 | regulation of guanylate cyclase activity          | 10/21092  | 7.96591E-06 | 0.012386993 | 0.011663772 | Guca1b/Guca1a/Nos1                    | 3     |
| GO:0006140 | regulation of nucleotide metabolic process        | 97/21092  | 5.08445E-05 | 0.03953156  | 0.03722349  | Guca1b/Me1/Guca1a/Nos1/Cox7a2         | 5     |
| GO:1900542 | regulation of purine nucleotide metabolic process | 93/21092  | 0.000596112 | 0.140031904 | 0.13185607  | Guca1b/Guca1a/Nos1/Cox7a2             | 4     |
| GO:0031279 | regulation of cyclase activity                    | 41/21092  | 0.000645175 | 0.140031904 | 0.13185607  | Guca1b/Guca1a/Nos1                    | 3     |
| GO:0010753 | positive regulation of cGMP-mediated signaling    | 10/21092  | 0.00074076  | 0.140031904 | 0.13185607  | Cgas/Guca1a                           | 2     |
| GO:0051339 | regulation of lyase activity                      | 43/21092  | 0.000742487 | 0.140031904 | 0.13185607  | Guca1b/Guca1a/Nos1                    | 3     |
| GO:0007128 | meiotic prophase I                                | 11/21092  | 0.000902946 | 0.140031904 | 0.13185607  | Mlh1/Piwil2                           | 2     |
| GO:0051324 | prophase                                          | 11/21092  | 0.000902946 | 0.140031904 | 0.13185607  | Mlh1/Piwil2                           | 2     |
| GO:0061448 | connective tissue development                     | 274/21092 | 0.000953328 | 0.140031904 | 0.13185607  | Poc1a/Adams7/Col12a1/Arid5b/Sox6/Hes5 | 6     |

|            |                                                                     |           |             |             |             |                                     |   |
|------------|---------------------------------------------------------------------|-----------|-------------|-------------|-------------|-------------------------------------|---|
| GO:0000279 | M phase                                                             | 12/21092  | 0.001080632 | 0.140031904 | 0.13185607  | Mlh1/Piwil2                         | 2 |
| GO:0098762 | meiotic cell cycle phase                                            | 12/21092  | 0.001080632 | 0.140031904 | 0.13185607  | Mlh1/Piwil2                         | 2 |
| GO:0098764 | meiosis I cell cycle phase                                          | 12/21092  | 0.001080632 | 0.140031904 | 0.13185607  | Mlh1/Piwil2                         | 2 |
| GO:0045604 | regulation of epidermal cell differentiation                        | 52/21092  | 0.00129456  | 0.15112002  | 0.1422968   | Cd109/Ptch2/Hes5                    | 3 |
| GO:0002062 | chondrocyte differentiation                                         | 116/21092 | 0.001360566 | 0.15112002  | 0.1422968   | Poc1a/Adamts7/Col12a1/Sox6          | 4 |
| GO:0021781 | glial cell fate commitment                                          | 14/21092  | 0.001481992 | 0.153633144 | 0.144663194 | Sox6/Hes5                           | 2 |
| GO:0051216 | cartilage development                                               | 205/21092 | 0.001600836 | 0.155581213 | 0.146497524 | Poc1a/Adamts7/Col12a1/Sox6/Hes5     | 5 |
| GO:0010752 | regulation of cGMP-mediated signaling                               | 18/21092  | 0.002465137 | 0.198716323 | 0.187114169 | Cgas/Guca1a                         | 2 |
| GO:0030808 | regulation of nucleotide biosynthetic process                       | 66/21092  | 0.002571542 | 0.198716323 | 0.187114169 | Guca1b/Guca1a/Nos1                  | 3 |
| GO:1900371 | regulation of purine nucleotide biosynthetic process                | 66/21092  | 0.002571542 | 0.198716323 | 0.187114169 | Guca1b/Guca1a/Nos1                  | 3 |
| GO:0062012 | regulation of small molecule metabolic process                      | 340/21092 | 0.002836471 | 0.198716323 | 0.187114169 | Guca1b/Me1/Elov5/Guca1a/Nos1/Cox7a2 | 6 |
| GO:0022403 | cell cycle phase                                                    | 20/21092  | 0.003044935 | 0.198716323 | 0.187114169 | Mlh1/Piwil2                         | 2 |
| GO:0031281 | positive regulation of cyclase activity                             | 20/21092  | 0.003044935 | 0.198716323 | 0.187114169 | Guca1a/Nos1                         | 2 |
| GO:0051349 | positive regulation of lyase activity                               | 20/21092  | 0.003044935 | 0.198716323 | 0.187114169 | Guca1a/Nos1                         | 2 |
| GO:0007601 | visual perception                                                   | 145/21092 | 0.003067004 | 0.198716323 | 0.187114169 | Guca1b/Bfsp2/Wfs1/Guca1a            | 4 |
| GO:0003433 | chondrocyte development involved in endochondral bone morphogenesis | 21/21092  | 0.003356461 | 0.202224923 | 0.190417917 | Poc1a/Col12a1                       | 2 |
| GO:0050953 | sensory perception of light stimulus                                | 149/21092 | 0.003381253 | 0.202224923 | 0.190417917 | Guca1b/Bfsp2/Wfs1/Guca1a            | 4 |
| GO:0003418 | growth plate cartilage chondrocyte differentiation                  | 22/21092  | 0.003682244 | 0.212069962 | 0.199688148 | Poc1a/Col12a1                       | 2 |
| GO:0045682 | regulation of epidermis development                                 | 78/21092  | 0.004126127 | 0.229147391 | 0.215768503 | Cd109/Ptch2/Hes5                    | 3 |
| GO:1903035 | negative regulation of response to wounding                         | 83/21092  | 0.004910303 | 0.263293819 | 0.247921275 | Cd109/Klk8/Tmprss6                  | 3 |
| GO:0001822 | kidney development                                                  | 274/21092 | 0.005544714 | 0.287401017 | 0.270620961 | Pygo1/Wfs1/Aph1c/Arid5b/Hes5        | 5 |

|            |                                                                         |           |             |             |             |                                   |   |
|------------|-------------------------------------------------------------------------|-----------|-------------|-------------|-------------|-----------------------------------|---|
| GO:0003413 | chondrocyte differentiation involved in endochondral bone morphogenesis | 28/21092  | 0.005929656 | 0.28974529  | 0.272828363 | Poc1a/Col12a1                     | 2 |
| GO:0000041 | transition metal ion transport                                          | 89/21092  | 0.005962604 | 0.28974529  | 0.272828363 | Atp2c1/Heph/Nectin1               | 3 |
| GO:0035066 | positive regulation of histone acetylation                              | 29/21092  | 0.006351912 | 0.299309808 | 0.281834451 | Nos1/Piwil2                       | 2 |
| GO:2000272 | negative regulation of signaling receptor activity                      | 30/21092  | 0.006787485 | 0.310427604 | 0.292303129 | Crhbp/Socs5                       | 2 |
| GO:0046916 | cellular transition metal ion homeostasis                               | 95/21092  | 0.00714002  | 0.31256615  | 0.294316814 | Tmprss6/Atp2c1/Heph               | 3 |
| GO:0007602 | phototransduction                                                       | 31/21092  | 0.007236258 | 0.31256615  | 0.294316814 | Guca1b/Guca1a                     | 2 |
| GO:0072001 | renal system development                                                | 296/21092 | 0.007626354 | 0.317723617 | 0.299173161 | Pygo1/Wfs1/Aph1c/Arid5b/Hes5      | 5 |
| GO:0030810 | positive regulation of nucleotide biosynthetic process                  | 33/21092  | 0.008172955 | 0.317723617 | 0.299173161 | Guca1a/Nos1                       | 2 |
| GO:1900373 | positive regulation of purine nucleotide biosynthetic process           | 33/21092  | 0.008172955 | 0.317723617 | 0.299173161 | Guca1a/Nos1                       | 2 |
| GO:2000758 | positive regulation of peptidyl-lysine acetylation                      | 33/21092  | 0.008172955 | 0.317723617 | 0.299173161 | Nos1/Piwil2                       | 2 |
| GO:0006826 | iron ion transport                                                      | 35/21092  | 0.009161101 | 0.334296956 | 0.314778857 | Heph/Nectin1                      | 2 |
| GO:0006986 | response to unfolded protein                                            | 106/21092 | 0.009634673 | 0.334296956 | 0.314778857 | Wfs1/Hspb1/Hspa1b                 | 3 |
| GO:0003417 | growth plate cartilage development                                      | 36/21092  | 0.009674188 | 0.334296956 | 0.314778857 | Poc1a/Col12a1                     | 2 |
| GO:0006739 | NADP metabolic process                                                  | 36/21092  | 0.009674188 | 0.334296956 | 0.314778857 | Me1/Cyb5r4                        | 2 |
| GO:0043950 | positive regulation of cAMP-mediated signaling                          | 36/21092  | 0.009674188 | 0.334296956 | 0.314778857 | Cgas/Nos1                         | 2 |
| GO:0048821 | erythrocyte development                                                 | 37/21092  | 0.010199805 | 0.344797769 | 0.324666574 | Tmod3/Sox6                        | 2 |
| GO:0032102 | negative regulation of response to external stimulus                    | 323/21092 | 0.01085927  | 0.359280116 | 0.338303362 | Cd109/Klk8/Nt5e/Tmprss6/Socs5     | 5 |
| GO:0019934 | cGMP-mediated signaling                                                 | 39/21092  | 0.011288189 | 0.364902962 | 0.343597915 | Cgas/Guca1a                       | 2 |
| GO:0042326 | negative regulation of phosphorylation                                  | 461/21092 | 0.012038113 | 0.364902962 | 0.343597915 | Cd109/Nos1/Socs5/Nprl2/Hspb1/lbtk | 6 |
| GO:0051701 | interaction with host                                                   | 116/21092 | 0.012291784 | 0.364902962 | 0.343597915 | Tusc2/Trim21/Nectin1              | 3 |
| GO:0042220 | response to cocaine                                                     | 42/21092  | 0.013012015 | 0.364902962 | 0.343597915 | Crhbp/Nos1                        | 2 |



|            |                                                                   |           |             |             |             |                              |   |
|------------|-------------------------------------------------------------------|-----------|-------------|-------------|-------------|------------------------------|---|
| GO:0045981 | positive regulation of nucleotide metabolic process               | 42/21092  | 0.013012015 | 0.364902962 | 0.343597915 | Guca1a/Nos1                  | 2 |
| GO:1900544 | positive regulation of purine nucleotide metabolic process        | 42/21092  | 0.013012015 | 0.364902962 | 0.343597915 | Guca1a/Nos1                  | 2 |
| GO:1901985 | positive regulation of protein acetylation                        | 42/21092  | 0.013012015 | 0.364902962 | 0.343597915 | Nos1/Piwil2                  | 2 |
| GO:0001655 | urogenital system development                                     | 339/21092 | 0.013163049 | 0.364902962 | 0.343597915 | Pygo1/Wfs1/Aph1c/Arid5b/Hes5 | 5 |
| GO:0001709 | cell fate determination                                           | 43/21092  | 0.013610528 | 0.364902962 | 0.343597915 | Ptch2/Hes5                   | 2 |
| GO:0003416 | endochondral bone growth                                          | 43/21092  | 0.013610528 | 0.364902962 | 0.343597915 | Poc1a/Col12a1                | 2 |
| GO:0043616 | keratinocyte proliferation                                        | 43/21092  | 0.013610528 | 0.364902962 | 0.343597915 | Cd109/Klk8                   | 2 |
| GO:0002063 | chondrocyte development                                           | 44/21092  | 0.014220818 | 0.372266453 | 0.350531485 | Poc1a/Col12a1                | 2 |
| GO:0072522 | purine-containing compound biosynthetic process                   | 227/21092 | 0.014511589 | 0.372266453 | 0.350531485 | Guca1b/Nt5e/Guca1a/Nos1      | 4 |
| GO:0044848 | biological phase                                                  | 45/21092  | 0.014842778 | 0.372266453 | 0.350531485 | Mlh1/Piwil2                  | 2 |
| GO:0098868 | bone growth                                                       | 45/21092  | 0.014842778 | 0.372266453 | 0.350531485 | Poc1a/Col12a1                | 2 |
| GO:0030218 | erythrocyte differentiation                                       | 126/21092 | 0.015329422 | 0.378369072 | 0.3562778   | Tmod3/Heph/Sox6              | 3 |
| GO:0035966 | response to topologically incorrect protein                       | 127/21092 | 0.015654387 | 0.380352676 | 0.35814559  | Wfs1/Hspb1/Hspa1b            | 3 |
| GO:0055076 | transition metal ion homeostasis                                  | 130/21092 | 0.016652558 | 0.389337206 | 0.366605554 | Tmprss6/Atp2c1/Heph          | 3 |
| GO:0031641 | regulation of myelination                                         | 48/21092  | 0.016777644 | 0.389337206 | 0.366605554 | Klk8/Hes5                    | 2 |
| GO:0032330 | regulation of chondrocyte differentiation                         | 48/21092  | 0.016777644 | 0.389337206 | 0.366605554 | Adams7/Sox6                  | 2 |
| GO:0060351 | cartilage development involved in endochondral bone morphogenesis | 51/21092  | 0.01881383  | 0.389337206 | 0.366605554 | Poc1a/Col12a1                | 2 |
| GO:0034101 | erythrocyte homeostasis                                           | 137/21092 | 0.019117914 | 0.389337206 | 0.366605554 | Tmod3/Heph/Sox6              | 3 |
| GO:0009791 | post-embryonic development                                        | 138/21092 | 0.01948573  | 0.389337206 | 0.366605554 | Pygo1/Arid5b/Sox6            | 3 |
| GO:0016573 | histone acetylation                                               | 138/21092 | 0.01948573  | 0.389337206 | 0.366605554 | Morf4l1/Nos1/Piwil2          | 3 |
| GO:0009583 | detection of light stimulus                                       | 52/21092  | 0.019514601 | 0.389337206 | 0.366605554 | Guca1b/Guca1a                | 2 |
| GO:0006879 | cellular iron ion homeostasis                                     | 54/21092  | 0.020948606 | 0.389337206 | 0.366605554 | Tmprss6/Heph                 | 2 |

|            |                                                                     |           |             |             |             |                             |   |
|------------|---------------------------------------------------------------------|-----------|-------------|-------------|-------------|-----------------------------|---|
| GO:0035065 | regulation of histone acetylation                                   | 54/21092  | 0.020948606 | 0.389337206 | 0.366605554 | Nos1/Piwil2                 | 2 |
| GO:0046718 | viral entry into host cell                                          | 54/21092  | 0.020948606 | 0.389337206 | 0.366605554 | Trim21/Nectin1              | 2 |
| GO:0061077 | chaperone-mediated protein folding                                  | 54/21092  | 0.020948606 | 0.389337206 | 0.366605554 | Hspb1/Hspa1b                | 2 |
| GO:0007224 | smoothened signaling pathway                                        | 143/21092 | 0.021383537 | 0.389337206 | 0.366605554 | Ptch2/Scube1/Hes5           | 3 |
| GO:0018393 | internal peptidyl-lysine acetylation                                | 143/21092 | 0.021383537 | 0.389337206 | 0.366605554 | Morf4l1/Nos1/Piwil2         | 3 |
| GO:0006475 | internal protein amino acid acetylation                             | 146/21092 | 0.022569246 | 0.389337206 | 0.366605554 | Morf4l1/Nos1/Piwil2         | 3 |
| GO:0030856 | regulation of epithelial cell differentiation                       | 146/21092 | 0.022569246 | 0.389337206 | 0.366605554 | Cd109/Ptch2/Hes5            | 3 |
| GO:0062013 | positive regulation of small molecule metabolic process             | 146/21092 | 0.022569246 | 0.389337206 | 0.366605554 | Elovl5/Guca1a/Nos1          | 3 |
| GO:0006457 | protein folding                                                     | 147/21092 | 0.022972324 | 0.389337206 | 0.366605554 | Ppib/Hspb1/Hspa1b           | 3 |
| GO:0030260 | entry into host cell                                                | 57/21092  | 0.02317929  | 0.389337206 | 0.366605554 | Trim21/Nectin1              | 2 |
| GO:0044409 | entry into host                                                     | 57/21092  | 0.02317929  | 0.389337206 | 0.366605554 | Trim21/Nectin1              | 2 |
| GO:0051806 | entry into cell of other organism involved in symbiotic interaction | 57/21092  | 0.02317929  | 0.389337206 | 0.366605554 | Trim21/Nectin1              | 2 |
| GO:0051828 | entry into other organism involved in symbiotic interaction         | 57/21092  | 0.02317929  | 0.389337206 | 0.366605554 | Trim21/Nectin1              | 2 |
| GO:0072347 | response to anesthetic                                              | 57/21092  | 0.02317929  | 0.389337206 | 0.366605554 | Crhbp/Nos1                  | 2 |
| GO:1903902 | positive regulation of viral life cycle                             | 57/21092  | 0.02317929  | 0.389337206 | 0.366605554 | Ppib/Trim21                 | 2 |
| GO:0018394 | peptidyl-lysine acetylation                                         | 154/21092 | 0.025903624 | 0.389337206 | 0.366605554 | Morf4l1/Nos1/Piwil2         | 3 |
| GO:0051926 | negative regulation of calcium ion transport                        | 61/21092  | 0.026298186 | 0.389337206 | 0.366605554 | Gnb5/Nos1                   | 2 |
| GO:0070206 | protein trimerization                                               | 61/21092  | 0.026298186 | 0.389337206 | 0.366605554 | Trim21/Col6a4               | 2 |
| GO:0006816 | calcium ion transport                                               | 409/21092 | 0.027100618 | 0.389337206 | 0.366605554 | Gnb5/Wfs1/Nos1/Atp2c1/Ibtk  | 5 |
| GO:2000736 | regulation of stem cell differentiation                             | 62/21092  | 0.027103103 | 0.389337206 | 0.366605554 | Sox6/Hes5                   | 2 |
| GO:2000756 | regulation of peptidyl-lysine acetylation                           | 63/21092  | 0.027917909 | 0.389337206 | 0.366605554 | Nos1/Piwil2                 | 2 |
| GO:0001933 | negative regulation of protein phosphorylation                      | 414/21092 | 0.028355965 | 0.389337206 | 0.366605554 | Cd109/Nos1/Socs5/Hspb1/Ibtk | 5 |

|            |                                                           |           |             |             |             |                                |   |
|------------|-----------------------------------------------------------|-----------|-------------|-------------|-------------|--------------------------------|---|
| GO:0043949 | regulation of cAMP-mediated signaling                     | 64/21092  | 0.02874251  | 0.389337206 | 0.366605554 | Cgas/Nos1                      | 2 |
| GO:1901264 | carbohydrate derivative transport                         | 64/21092  | 0.02874251  | 0.389337206 | 0.366605554 | Slc17a5/Slc35b2                | 2 |
| GO:0061035 | regulation of cartilage development                       | 66/21092  | 0.030420729 | 0.389337206 | 0.366605554 | Adams7/Sox6                    | 2 |
| GO:0090278 | negative regulation of peptide hormone secretion          | 66/21092  | 0.030420729 | 0.389337206 | 0.366605554 | Crhbp/Nos1                     | 2 |
| GO:1903034 | regulation of response to wounding                        | 165/21092 | 0.030897152 | 0.389337206 | 0.366605554 | Cd109/Klk8/Tmprss6             | 3 |
| GO:0061045 | negative regulation of wound healing                      | 67/21092  | 0.031274163 | 0.389337206 | 0.366605554 | Cd109/Tmprss6                  | 2 |
| GO:0007051 | spindle organization                                      | 166/21092 | 0.031374485 | 0.389337206 | 0.366605554 | Poc1a/Mlh1/Hspa1b              | 3 |
| GO:0006163 | purine nucleotide metabolic process                       | 426/21092 | 0.031518336 | 0.389337206 | 0.366605554 | Guca1b/Nt5e/Guca1a/Nos1/Cox7a2 | 5 |
| GO:0002262 | myeloid cell homeostasis                                  | 171/21092 | 0.033819296 | 0.389337206 | 0.366605554 | Tmod3/Heph/Sox6                | 3 |
| GO:0002088 | lens development in camera-type eye                       | 70/21092  | 0.033890674 | 0.389337206 | 0.366605554 | Bfsp2/Nectin1                  | 2 |
| GO:0043627 | response to estrogen                                      | 72/21092  | 0.035680958 | 0.389337206 | 0.366605554 | Crhbp/Nos1                     | 2 |
| GO:0051851 | modification by host of symbiont morphology or physiology | 72/21092  | 0.035680958 | 0.389337206 | 0.366605554 | Ppib/Tusc2                     | 2 |
| GO:0060271 | cilium assembly                                           | 301/21092 | 0.03599202  | 0.389337206 | 0.366605554 | Poc1a/Mns1/Gmnc/Ulk4           | 4 |
| GO:0071772 | response to BMP                                           | 176/21092 | 0.036360604 | 0.389337206 | 0.366605554 | Adams7/Tmprss6/Hes5            | 3 |
| GO:0071773 | cellular response to BMP stimulus                         | 176/21092 | 0.036360604 | 0.389337206 | 0.366605554 | Adams7/Tmprss6/Hes5            | 3 |
| GO:0060350 | endochondral bone morphogenesis                           | 73/21092  | 0.036589618 | 0.389337206 | 0.366605554 | Poc1a/Col12a1                  | 2 |
| GO:0034620 | cellular response to unfolded protein                     | 74/21092  | 0.037507172 | 0.389337206 | 0.366605554 | Wfs1/Hspa1b                    | 2 |
| GO:1901983 | regulation of protein acetylation                         | 74/21092  | 0.037507172 | 0.389337206 | 0.366605554 | Nos1/Piwil2                    | 2 |
| GO:0061515 | myeloid cell development                                  | 75/21092  | 0.038433534 | 0.389337206 | 0.366605554 | Tmod3/Sox6                     | 2 |
| GO:0051702 | interaction with symbiont                                 | 77/21092  | 0.040312336 | 0.389337206 | 0.366605554 | Ppib/Tusc2                     | 2 |
| GO:0002118 | aggressive behavior                                       | 10/21092  | 0.040499085 | 0.389337206 | 0.366605554 | Crhbp                          | 1 |
| GO:0002934 | desmosome organization                                    | 10/21092  | 0.040499085 | 0.389337206 | 0.366605554 | Nectin1                        | 1 |
| GO:0003091 | renal water homeostasis                                   | 10/21092  | 0.040499085 | 0.389337206 | 0.366605554 | Wfs1                           | 1 |

|            |                                                                |           |             |             |             |                            |   |
|------------|----------------------------------------------------------------|-----------|-------------|-------------|-------------|----------------------------|---|
| GO:0006995 | cellular response to nitrogen starvation                       | 10/21092  | 0.040499085 | 0.389337206 | 0.366605554 | Nprl2                      | 1 |
| GO:0007220 | Notch receptor processing                                      | 10/21092  | 0.040499085 | 0.389337206 | 0.366605554 | Aph1c                      | 1 |
| GO:0010825 | positive regulation of centrosome duplication                  | 10/21092  | 0.040499085 | 0.389337206 | 0.366605554 | Poc1a                      | 1 |
| GO:0043562 | cellular response to nitrogen levels                           | 10/21092  | 0.040499085 | 0.389337206 | 0.366605554 | Nprl2                      | 1 |
| GO:0044154 | histone H3-K14 acetylation                                     | 10/21092  | 0.040499085 | 0.389337206 | 0.366605554 | Piwil2                     | 1 |
| GO:0045607 | regulation of inner ear auditory receptor cell differentiation | 10/21092  | 0.040499085 | 0.389337206 | 0.366605554 | Hes5                       | 1 |
| GO:0045631 | regulation of mechanoreceptor differentiation                  | 10/21092  | 0.040499085 | 0.389337206 | 0.366605554 | Hes5                       | 1 |
| GO:0046085 | adenosine metabolic process                                    | 10/21092  | 0.040499085 | 0.389337206 | 0.366605554 | Nt5e                       | 1 |
| GO:0048149 | behavioral response to ethanol                                 | 10/21092  | 0.040499085 | 0.389337206 | 0.366605554 | Crhbp                      | 1 |
| GO:0051458 | corticotropin secretion                                        | 10/21092  | 0.040499085 | 0.389337206 | 0.366605554 | Crhbp                      | 1 |
| GO:0051764 | actin crosslink formation                                      | 10/21092  | 0.040499085 | 0.389337206 | 0.366605554 | Baiap21l                   | 1 |
| GO:0072070 | loop of Henle development                                      | 10/21092  | 0.040499085 | 0.389337206 | 0.366605554 | Hes5                       | 1 |
| GO:0072173 | metanephric tubule morphogenesis                               | 10/21092  | 0.040499085 | 0.389337206 | 0.366605554 | Hes5                       | 1 |
| GO:0090343 | positive regulation of cell aging                              | 10/21092  | 0.040499085 | 0.389337206 | 0.366605554 | Cgas                       | 1 |
| GO:1905456 | regulation of lymphoid progenitor cell differentiation         | 10/21092  | 0.040499085 | 0.389337206 | 0.366605554 | Hes5                       | 1 |
| GO:2000980 | regulation of inner ear receptor cell differentiation          | 10/21092  | 0.040499085 | 0.389337206 | 0.366605554 | Hes5                       | 1 |
| GO:0006473 | protein acetylation                                            | 184/21092 | 0.040625775 | 0.389337206 | 0.366605554 | Morf4l1/Nos1/Piwil2        | 3 |
| GO:0070838 | divalent metal ion transport                                   | 457/21092 | 0.040686115 | 0.389337206 | 0.366605554 | Gnb5/Wfs1/Nos1/Atp2c1/Ibtk | 5 |
| GO:0071277 | cellular response to calcium ion                               | 78/21092  | 0.041264605 | 0.389337206 | 0.366605554 | Crhbp/Syt12                | 2 |
| GO:0072511 | divalent inorganic cation transport                            | 460/21092 | 0.041650992 | 0.389337206 | 0.366605554 | Gnb5/Wfs1/Nos1/Atp2c1/Ibtk | 5 |
| GO:0043279 | response to alkaloid                                           | 79/21092  | 0.042225339 | 0.389337206 | 0.366605554 | Crhbp/Nos1                 | 2 |

|            |                                                                                  |           |             |             |             |                                |   |
|------------|----------------------------------------------------------------------------------|-----------|-------------|-------------|-------------|--------------------------------|---|
| GO:0048708 | astrocyte differentiation                                                        | 79/21092  | 0.042225339 | 0.389337206 | 0.366605554 | Sox6/Hes5                      | 2 |
| GO:0007218 | neuropeptide signaling pathway                                                   | 80/21092  | 0.043194454 | 0.389337206 | 0.366605554 | Npy/Cort                       | 2 |
| GO:0008544 | epidermis development                                                            | 321/21092 | 0.04385706  | 0.389337206 | 0.366605554 | Cd109/Ptch2/Atp2c1/Hes5        | 4 |
| GO:0015748 | organophosphate ester transport                                                  | 81/21092  | 0.044171866 | 0.389337206 | 0.366605554 | Stard10/Slc35b2                | 2 |
| GO:0030203 | glycosaminoglycan metabolic process                                              | 81/21092  | 0.044171866 | 0.389337206 | 0.366605554 | Pxylp1/Itih3                   | 2 |
| GO:0032436 | positive regulation of proteasomal ubiquitin-dependent protein catabolic process | 81/21092  | 0.044171866 | 0.389337206 | 0.366605554 | Socs5/Hspa1b                   | 2 |
| GO:0002756 | MyD88-independent toll-like receptor signaling pathway                           | 11/21092  | 0.044458699 | 0.389337206 | 0.366605554 | Lrrfip2                        | 1 |
| GO:0006527 | arginine catabolic process                                                       | 11/21092  | 0.044458699 | 0.389337206 | 0.366605554 | Nos1                           | 1 |
| GO:0009125 | nucleoside monophosphate catabolic process                                       | 11/21092  | 0.044458699 | 0.389337206 | 0.366605554 | Nt5e                           | 1 |
| GO:0048664 | neuron fate determination                                                        | 11/21092  | 0.044458699 | 0.389337206 | 0.366605554 | Hes5                           | 1 |
| GO:0070944 | neutrophil mediated killing of bacterium                                         | 11/21092  | 0.044458699 | 0.389337206 | 0.366605554 | Tusc2                          | 1 |
| GO:0086103 | G protein-coupled receptor signaling pathway involved in heart process           | 11/21092  | 0.044458699 | 0.389337206 | 0.366605554 | Nos1                           | 1 |
| GO:0097264 | self proteolysis                                                                 | 11/21092  | 0.044458699 | 0.389337206 | 0.366605554 | Tmprss6                        | 1 |
| GO:2000615 | regulation of histone H3-K9 acetylation                                          | 11/21092  | 0.044458699 | 0.389337206 | 0.366605554 | Piwil2                         | 1 |
| GO:0072521 | purine-containing compound metabolic process                                     | 469/21092 | 0.044628846 | 0.389337206 | 0.366605554 | Guca1b/Nt5e/Guca1a/Nos1/Cox7a2 | 5 |
| GO:0048524 | positive regulation of viral process                                             | 82/21092  | 0.045157492 | 0.389337206 | 0.366605554 | Ppib/Trim21                    | 2 |
| GO:0019058 | viral life cycle                                                                 | 193/21092 | 0.045713446 | 0.389337206 | 0.366605554 | Ppib/Trim21/Nectin1            | 3 |
| GO:0044782 | cilium organization                                                              | 326/21092 | 0.045963204 | 0.389337206 | 0.366605554 | Poc1a/Mns1/Gmnc/Ulk4           | 4 |
| GO:0048469 | cell maturation                                                                  | 194/21092 | 0.046297442 | 0.389337206 | 0.366605554 | Bfsp2/Tusc2/Hes5               | 3 |
| GO:0006862 | nucleotide transport                                                             | 12/21092  | 0.048402159 | 0.389337206 | 0.366605554 | Slc35b2                        | 1 |
| GO:0043970 | histone H3-K9 acetylation                                                        | 12/21092  | 0.048402159 | 0.389337206 | 0.366605554 | Piwil2                         | 1 |

|            |                                                        |           |             |             |             |                   |   |
|------------|--------------------------------------------------------|-----------|-------------|-------------|-------------|-------------------|---|
| GO:0045625 | regulation of T-helper 1 cell differentiation          | 12/21092  | 0.048402159 | 0.389337206 | 0.366605554 | Socs5             | 1 |
| GO:0070986 | left/right axis specification                          | 12/21092  | 0.048402159 | 0.389337206 | 0.366605554 | Mns1              | 1 |
| GO:2000674 | regulation of type B pancreatic cell apoptotic process | 12/21092  | 0.048402159 | 0.389337206 | 0.366605554 | Wfs1              | 1 |
| GO:1902115 | regulation of organelle assembly                       | 199/21092 | 0.049272929 | 0.389337206 | 0.366605554 | Mns1/Nprl2/Hspa1b | 3 |

Supp. Table S15. List of Biological Processes (BP) at FDR 5% - cerebral cortex

| GO ID      | Description                                                             | BgRatio   | pvalue      | p.adjust    | qvalue      | geneID                | Count |
|------------|-------------------------------------------------------------------------|-----------|-------------|-------------|-------------|-----------------------|-------|
| GO:0003433 | chondrocyte development involved in endochondral bone morphogenesis     | 21/21092  | 0.000615719 | 0.139820453 | 0.11902696  | Poc1a/Col12a1         | 2     |
| GO:0003418 | growth plate cartilage chondrocyte differentiation                      | 22/21092  | 0.000676543 | 0.139820453 | 0.11902696  | Poc1a/Col12a1         | 2     |
| GO:0120034 | positive regulation of plasma membrane bounded cell projection assembly | 106/21092 | 0.000846561 | 0.139820453 | 0.11902696  | Mns1/Zmynd10/Rhoq     | 3     |
| GO:0003413 | chondrocyte differentiation involved in endochondral bone morphogenesis | 28/21092  | 0.001099759 | 0.139820453 | 0.11902696  | Poc1a/Col12a1         | 2     |
| GO:0045724 | positive regulation of cilium assembly                                  | 28/21092  | 0.001099759 | 0.139820453 | 0.11902696  | Mns1/Zmynd10          | 2     |
| GO:0070306 | lens fiber cell differentiation                                         | 29/21092  | 0.001179919 | 0.139820453 | 0.11902696  | Bfsp2/Ntrk3           | 2     |
| GO:0003417 | growth plate cartilage development                                      | 36/21092  | 0.001816821 | 0.154604889 | 0.131612719 | Poc1a/Col12a1         | 2     |
| GO:0006739 | NADP metabolic process                                                  | 36/21092  | 0.001816821 | 0.154604889 | 0.131612719 | Me1/Cyb5r4            | 2     |
| GO:0007601 | visual perception                                                       | 145/21092 | 0.002083607 | 0.154604889 | 0.131612719 | Guca1b/Bfsp2/Cacna2d4 | 3     |
| GO:0050953 | sensory perception of light stimulus                                    | 149/21092 | 0.002251264 | 0.154604889 | 0.131612719 | Guca1b/Bfsp2/Cacna2d4 | 3     |
| GO:0003416 | endochondral bone growth                                                | 43/21092  | 0.002584086 | 0.154604889 | 0.131612719 | Poc1a/Col12a1         | 2     |
| GO:0002063 | chondrocyte development                                                 | 44/21092  | 0.002704155 | 0.154604889 | 0.131612719 | Poc1a/Col12a1         | 2     |
| GO:0098868 | bone growth                                                             | 45/21092  | 0.002826812 | 0.154604889 | 0.131612719 | Poc1a/Col12a1         | 2     |
| GO:0060351 | cartilage development involved in endochondral bone morphogenesis       | 51/21092  | 0.003616605 | 0.173279586 | 0.147510196 | Poc1a/Col12a1         | 2     |

|            |                                                                |           |             |             |             |                         |   |
|------------|----------------------------------------------------------------|-----------|-------------|-------------|-------------|-------------------------|---|
| GO:0009583 | detection of light stimulus                                    | 52/21092  | 0.003757129 | 0.173279586 | 0.147510196 | Guca1b/Cacna2d4         | 2 |
| GO:0120032 | regulation of plasma membrane bounded cell projection assembly | 183/21092 | 0.004019105 | 0.173279586 | 0.147510196 | Mns1/Zmynd10/Rhoq       | 3 |
| GO:0060491 | regulation of cell projection assembly                         | 185/21092 | 0.004143112 | 0.173279586 | 0.147510196 | Mns1/Zmynd10/Rhoq       | 3 |
| GO:1902017 | regulation of cilium assembly                                  | 58/21092  | 0.004652825 | 0.183786586 | 0.156454641 | Mns1/Zmynd10            | 2 |
| GO:1902115 | regulation of organelle assembly                               | 199/21092 | 0.005076661 | 0.189973992 | 0.161721882 | Mns1/Zmynd10/Ntrk3      | 3 |
| GO:0060348 | bone development                                               | 220/21092 | 0.00669866  | 0.22492988  | 0.191479282 | Poc1a/Col12a1/Ppib      | 3 |
| GO:0002088 | lens development in camera-type eye                            | 70/21092  | 0.006708555 | 0.22492988  | 0.191479282 | Bfsp2/Ntrk3             | 2 |
| GO:0007422 | peripheral nervous system development                          | 73/21092  | 0.007276213 | 0.22492988  | 0.191479282 | Ntrk3/Egr3              | 2 |
| GO:0060350 | endochondral bone morphogenesis                                | 73/21092  | 0.007276213 | 0.22492988  | 0.191479282 | Poc1a/Col12a1           | 2 |
| GO:1902117 | positive regulation of organelle assembly                      | 78/21092  | 0.008268942 | 0.231551969 | 0.197116562 | Mns1/Zmynd10            | 2 |
| GO:0031346 | positive regulation of cell projection organization            | 462/21092 | 0.00847536  | 0.231551969 | 0.197116562 | Mns1/Zmynd10/Ntrk3/Rhoq | 4 |
| GO:0120031 | plasma membrane bounded cell projection assembly               | 493/21092 | 0.010583125 | 0.231551969 | 0.197116562 | Mns1/Poc1a/Zmynd10/Rhoq | 4 |
| GO:0006140 | regulation of nucleotide metabolic process                     | 97/21092  | 0.012556103 | 0.231551969 | 0.197116562 | Guca1b/Me1              | 2 |
| GO:0060271 | cilium assembly                                                | 301/21092 | 0.015630743 | 0.231551969 | 0.197116562 | Mns1/Poc1a/Zmynd10      | 3 |
| GO:0060349 | bone morphogenesis                                             | 115/21092 | 0.017332275 | 0.231551969 | 0.197116562 | Poc1a/Col12a1           | 2 |
| GO:0010825 | positive regulation of centrosome duplication                  | 10/21092  | 0.017408049 | 0.231551969 | 0.197116562 | Poc1a                   | 1 |
| GO:0031282 | regulation of guanylate cyclase activity                       | 10/21092  | 0.017408049 | 0.231551969 | 0.197116562 | Guca1b                  | 1 |
| GO:0002062 | chondrocyte differentiation                                    | 116/21092 | 0.017617071 | 0.231551969 | 0.197116562 | Poc1a/Col12a1           | 2 |
| GO:0002756 | MyD88-independent toll-like receptor signaling pathway         | 11/21092  | 0.019132549 | 0.231551969 | 0.197116562 | Lrrfip2                 | 1 |
| GO:0007128 | meiotic prophase I                                             | 11/21092  | 0.019132549 | 0.231551969 | 0.197116562 | Mlh1                    | 1 |
| GO:0019227 | neuronal action potential propagation                          | 11/21092  | 0.019132549 | 0.231551969 | 0.197116562 | Ntrk3                   | 1 |
| GO:0048680 | positive regulation of axon regeneration                       | 11/21092  | 0.019132549 | 0.231551969 | 0.197116562 | Ntrk3                   | 1 |

|            |                                                                  |           |             |             |             |                    |   |
|------------|------------------------------------------------------------------|-----------|-------------|-------------|-------------|--------------------|---|
| GO:0051324 | prophase                                                         | 11/21092  | 0.019132549 | 0.231551969 | 0.197116562 | Mlh1               | 1 |
| GO:0098870 | action potential propagation                                     | 11/21092  | 0.019132549 | 0.231551969 | 0.197116562 | Ntrk3              | 1 |
| GO:0044782 | cilium organization                                              | 326/21092 | 0.019289759 | 0.231551969 | 0.197116562 | Mns1/Poc1a/Zmynd10 | 3 |
| GO:0009582 | detection of abiotic stimulus                                    | 125/21092 | 0.020269212 | 0.231551969 | 0.197116562 | Guca1b/Cacna2d4    | 2 |
| GO:0034763 | negative regulation of transmembrane transport                   | 125/21092 | 0.020269212 | 0.231551969 | 0.197116562 | Gnb5/Rhoq          | 2 |
| GO:0009581 | detection of external stimulus                                   | 126/21092 | 0.020573645 | 0.231551969 | 0.197116562 | Guca1b/Cacna2d4    | 2 |
| GO:0000279 | M phase                                                          | 12/21092  | 0.020854104 | 0.231551969 | 0.197116562 | Mlh1               | 1 |
| GO:0070572 | positive regulation of neuron projection regeneration            | 12/21092  | 0.020854104 | 0.231551969 | 0.197116562 | Ntrk3              | 1 |
| GO:0070986 | left/right axis specification                                    | 12/21092  | 0.020854104 | 0.231551969 | 0.197116562 | Mns1               | 1 |
| GO:0098762 | meiotic cell cycle phase                                         | 12/21092  | 0.020854104 | 0.231551969 | 0.197116562 | Mlh1               | 1 |
| GO:0098764 | meiosis I cell cycle phase                                       | 12/21092  | 0.020854104 | 0.231551969 | 0.197116562 | Mlh1               | 1 |
| GO:0062012 | regulation of small molecule metabolic process                   | 340/21092 | 0.02152968  | 0.231551969 | 0.197116562 | Guca1b/Elov5/Me1   | 3 |
| GO:0006596 | polyamine biosynthetic process                                   | 13/21092  | 0.022572718 | 0.231551969 | 0.197116562 | Amd2               | 1 |
| GO:0016446 | somatic hypermutation of immunoglobulin genes                    | 13/21092  | 0.022572718 | 0.231551969 | 0.197116562 | Mlh1               | 1 |
| GO:0042492 | gamma-delta T cell differentiation                               | 13/21092  | 0.022572718 | 0.231551969 | 0.197116562 | Egr3               | 1 |
| GO:0042761 | very long-chain fatty acid biosynthetic process                  | 13/21092  | 0.022572718 | 0.231551969 | 0.197116562 | Elov5              | 1 |
| GO:0045141 | meiotic telomere clustering                                      | 13/21092  | 0.022572718 | 0.231551969 | 0.197116562 | Mlh1               | 1 |
| GO:0002566 | somatic diversification of immune receptors via somatic mutation | 14/21092  | 0.024288398 | 0.231551969 | 0.197116562 | Mlh1               | 1 |
| GO:0030497 | fatty acid elongation                                            | 14/21092  | 0.024288398 | 0.231551969 | 0.197116562 | Elov5              | 1 |
| GO:0036159 | inner dynein arm assembly                                        | 14/21092  | 0.024288398 | 0.231551969 | 0.197116562 | Zmynd10            | 1 |
| GO:0046607 | positive regulation of centrosome cycle                          | 14/21092  | 0.024288398 | 0.231551969 | 0.197116562 | Poc1a              | 1 |
| GO:0070307 | lens fiber cell development                                      | 14/21092  | 0.024288398 | 0.231551969 | 0.197116562 | Bfsp2              | 1 |



|            |                                                                                           |           |             |             |             |             |   |
|------------|-------------------------------------------------------------------------------------------|-----------|-------------|-------------|-------------|-------------|---|
| GO:0090220 | chromosome localization to nuclear envelope involved in homologous chromosome segregation | 14/21092  | 0.024288398 | 0.231551969 | 0.197116562 | Mlh1        | 1 |
| GO:0099151 | regulation of postsynaptic density assembly                                               | 14/21092  | 0.024288398 | 0.231551969 | 0.197116562 | Ntrk3       | 1 |
| GO:0046496 | nicotinamide nucleotide metabolic process                                                 | 142/21092 | 0.025701212 | 0.231551969 | 0.197116562 | Me1/Cyb5r4  | 2 |
| GO:0033089 | positive regulation of T cell differentiation in thymus                                   | 15/21092  | 0.026001147 | 0.231551969 | 0.197116562 | Egr3        | 1 |
| GO:0034397 | telomere localization                                                                     | 15/21092  | 0.026001147 | 0.231551969 | 0.197116562 | Mlh1        | 1 |
| GO:0044827 | modulation by host of viral genome replication                                            | 15/21092  | 0.026001147 | 0.231551969 | 0.197116562 | Ppib        | 1 |
| GO:0048304 | positive regulation of isotype switching to IgG isotypes                                  | 15/21092  | 0.026001147 | 0.231551969 | 0.197116562 | Mlh1        | 1 |
| GO:1901386 | negative regulation of voltage-gated calcium channel activity                             | 15/21092  | 0.026001147 | 0.231551969 | 0.197116562 | Gnb5        | 1 |
| GO:0019362 | pyridine nucleotide metabolic process                                                     | 144/21092 | 0.026375309 | 0.231551969 | 0.197116562 | Me1/Cyb5r4  | 2 |
| GO:0042552 | myelination                                                                               | 146/21092 | 0.027056585 | 0.231551969 | 0.197116562 | Ntrk3/S100b | 2 |
| GO:0003414 | chondrocyte morphogenesis involved in endochondral bone morphogenesis                     | 16/21092  | 0.027710971 | 0.231551969 | 0.197116562 | Col12a1     | 1 |
| GO:0003429 | growth plate cartilage chondrocyte morphogenesis                                          | 16/21092  | 0.027710971 | 0.231551969 | 0.197116562 | Col12a1     | 1 |
| GO:0043968 | histone H2A acetylation                                                                   | 16/21092  | 0.027710971 | 0.231551969 | 0.197116562 | Morf4l1     | 1 |
| GO:0044794 | positive regulation by host of viral process                                              | 16/21092  | 0.027710971 | 0.231551969 | 0.197116562 | Ppib        | 1 |
| GO:0046629 | gamma-delta T cell activation                                                             | 16/21092  | 0.027710971 | 0.231551969 | 0.197116562 | Egr3        | 1 |
| GO:0090171 | chondrocyte morphogenesis                                                                 | 16/21092  | 0.027710971 | 0.231551969 | 0.197116562 | Col12a1     | 1 |
| GO:1904889 | regulation of excitatory synapse assembly                                                 | 16/21092  | 0.027710971 | 0.231551969 | 0.197116562 | Ntrk3       | 1 |
| GO:2001015 | negative regulation of skeletal muscle cell differentiation                               | 16/21092  | 0.027710971 | 0.231551969 | 0.197116562 | S100b       | 1 |
| GO:0007272 | ensheathment of neurons                                                                   | 149/21092 | 0.028091837 | 0.231551969 | 0.197116562 | Ntrk3/S100b | 2 |

|            |                                                          |           |             |             |             |             |   |
|------------|----------------------------------------------------------|-----------|-------------|-------------|-------------|-------------|---|
| GO:0008360 | regulation of cell shape                                 | 149/21092 | 0.028091837 | 0.231551969 | 0.197116562 | Rhoq/S100b  | 2 |
| GO:0008366 | axon ensheathment                                        | 149/21092 | 0.028091837 | 0.231551969 | 0.197116562 | Ntrk3/S100b | 2 |
| GO:0072524 | pyridine-containing compound metabolic process           | 149/21092 | 0.028091837 | 0.231551969 | 0.197116562 | Me1/Cyb5r4  | 2 |
| GO:0003422 | growth plate cartilage morphogenesis                     | 17/21092  | 0.029417874 | 0.231551969 | 0.197116562 | Col12a1     | 1 |
| GO:0036158 | outer dynein arm assembly                                | 17/21092  | 0.029417874 | 0.231551969 | 0.197116562 | Zmynd10     | 1 |
| GO:1904469 | positive regulation of tumor necrosis factor secretion   | 17/21092  | 0.029417874 | 0.231551969 | 0.197116562 | Lrrfip2     | 1 |
| GO:0000712 | resolution of meiotic recombination intermediates        | 18/21092  | 0.031121862 | 0.231551969 | 0.197116562 | Mlh1        | 1 |
| GO:0006595 | polyamine metabolic process                              | 18/21092  | 0.031121862 | 0.231551969 | 0.197116562 | Amd2        | 1 |
| GO:0009309 | amine biosynthetic process                               | 18/21092  | 0.031121862 | 0.231551969 | 0.197116562 | Amd2        | 1 |
| GO:0031643 | positive regulation of myelination                       | 18/21092  | 0.031121862 | 0.231551969 | 0.197116562 | S100b       | 1 |
| GO:0042401 | cellular biogenic amine biosynthetic process             | 18/21092  | 0.031121862 | 0.231551969 | 0.197116562 | Amd2        | 1 |
| GO:0048302 | regulation of isotype switching to IgG isotypes          | 18/21092  | 0.031121862 | 0.231551969 | 0.197116562 | Mlh1        | 1 |
| GO:0048712 | negative regulation of astrocyte differentiation         | 18/21092  | 0.031121862 | 0.231551969 | 0.197116562 | Ntrk3       | 1 |
| GO:0050650 | chondroitin sulfate proteoglycan biosynthetic process    | 18/21092  | 0.031121862 | 0.231551969 | 0.197116562 | Pxylp1      | 1 |
| GO:0099150 | regulation of postsynaptic specialization assembly       | 18/21092  | 0.031121862 | 0.231551969 | 0.197116562 | Ntrk3       | 1 |
| GO:0150052 | regulation of postsynapse assembly                       | 18/21092  | 0.031121862 | 0.231551969 | 0.197116562 | Ntrk3       | 1 |
| GO:0006733 | oxidoreduction coenzyme metabolic process                | 160/21092 | 0.03202188  | 0.231551969 | 0.197116562 | Me1/Cyb5r4  | 2 |
| GO:0048291 | isotype switching to IgG isotypes                        | 19/21092  | 0.032822939 | 0.231551969 | 0.197116562 | Mlh1        | 1 |
| GO:1905874 | regulation of postsynaptic density organization          | 19/21092  | 0.032822939 | 0.231551969 | 0.197116562 | Ntrk3       | 1 |
| GO:2000251 | positive regulation of actin cytoskeleton reorganization | 19/21092  | 0.032822939 | 0.231551969 | 0.197116562 | Ntrk3       | 1 |

|            |                                                                |           |             |             |             |            |   |
|------------|----------------------------------------------------------------|-----------|-------------|-------------|-------------|------------|---|
| GO:0007051 | spindle organization                                           | 166/21092 | 0.034252067 | 0.231551969 | 0.197116562 | Poc1a/Mlh1 | 2 |
| GO:0043271 | negative regulation of ion transport                           | 166/21092 | 0.034252067 | 0.231551969 | 0.197116562 | Gnb5/Plcb4 | 2 |
| GO:0002755 | MyD88-dependent toll-like receptor signaling pathway           | 20/21092  | 0.034521109 | 0.231551969 | 0.197116562 | Lrrfip2    | 1 |
| GO:0010560 | positive regulation of glycoprotein biosynthetic process       | 20/21092  | 0.034521109 | 0.231551969 | 0.197116562 | Pxylp1     | 1 |
| GO:0022403 | cell cycle phase                                               | 20/21092  | 0.034521109 | 0.231551969 | 0.197116562 | Mlh1       | 1 |
| GO:0032148 | activation of protein kinase B activity                        | 20/21092  | 0.034521109 | 0.231551969 | 0.197116562 | Ntrk3      | 1 |
| GO:0046325 | negative regulation of glucose import                          | 20/21092  | 0.034521109 | 0.231551969 | 0.197116562 | Rhoq       | 1 |
| GO:0050908 | detection of light stimulus involved in visual perception      | 20/21092  | 0.034521109 | 0.231551969 | 0.197116562 | Cacna2d4   | 1 |
| GO:0050962 | detection of light stimulus involved in sensory perception     | 20/21092  | 0.034521109 | 0.231551969 | 0.197116562 | Cacna2d4   | 1 |
| GO:0015012 | heparan sulfate proteoglycan biosynthetic process              | 21/21092  | 0.036216379 | 0.24065276  | 0.204863923 | Pxylp1     | 1 |
| GO:0000289 | nuclear-transcribed mRNA poly(A) tail shortening               | 22/21092  | 0.037908752 | 0.24065288  | 0.204864026 | Mlh1       | 1 |
| GO:0000413 | protein peptidyl-prolyl isomerization                          | 22/21092  | 0.037908752 | 0.24065288  | 0.204864026 | Ppib       | 1 |
| GO:0045723 | positive regulation of fatty acid biosynthetic process         | 22/21092  | 0.037908752 | 0.24065288  | 0.204864026 | Elov5      | 1 |
| GO:0097107 | postsynaptic density assembly                                  | 22/21092  | 0.037908752 | 0.24065288  | 0.204864026 | Ntrk3      | 1 |
| GO:1903020 | positive regulation of glycoprotein metabolic process          | 22/21092  | 0.037908752 | 0.24065288  | 0.204864026 | Pxylp1     | 1 |
| GO:0060972 | left/right pattern formation                                   | 23/21092  | 0.039598233 | 0.244743578 | 0.208346372 | Mns1       | 1 |
| GO:1903077 | negative regulation of protein localization to plasma membrane | 23/21092  | 0.039598233 | 0.244743578 | 0.208346372 | Rhoq       | 1 |
| GO:0006298 | mismatch repair                                                | 25/21092  | 0.042968541 | 0.244743578 | 0.208346372 | Mlh1       | 1 |
| GO:0007289 | spermatid nucleus differentiation                              | 25/21092  | 0.042968541 | 0.244743578 | 0.208346372 | Pygo1      | 1 |

|            |                                                                       |          |             |             |             |         |   |
|------------|-----------------------------------------------------------------------|----------|-------------|-------------|-------------|---------|---|
| GO:0010829 | negative regulation of glucose transmembrane transport                | 25/21092 | 0.042968541 | 0.244743578 | 0.208346372 | Rhoq    | 1 |
| GO:0044788 | modulation by host of viral process                                   | 25/21092 | 0.042968541 | 0.244743578 | 0.208346372 | Ppib    | 1 |
| GO:1904376 | negative regulation of protein localization to cell periphery         | 25/21092 | 0.042968541 | 0.244743578 | 0.208346372 | Rhoq    | 1 |
| GO:0006312 | mitotic recombination                                                 | 26/21092 | 0.044649377 | 0.244743578 | 0.208346372 | Mlh1    | 1 |
| GO:0030201 | heparan sulfate proteoglycan metabolic process                        | 26/21092 | 0.044649377 | 0.244743578 | 0.208346372 | Pxylp1  | 1 |
| GO:0048642 | negative regulation of skeletal muscle tissue development             | 26/21092 | 0.044649377 | 0.244743578 | 0.208346372 | S100b   | 1 |
| GO:0050927 | positive regulation of positive chemotaxis                            | 26/21092 | 0.044649377 | 0.244743578 | 0.208346372 | Ntrk3   | 1 |
| GO:1901020 | negative regulation of calcium ion transmembrane transporter activity | 26/21092 | 0.044649377 | 0.244743578 | 0.208346372 | Gnb5    | 1 |
| GO:1904861 | excitatory synapse assembly                                           | 26/21092 | 0.044649377 | 0.244743578 | 0.208346372 | Ntrk3   | 1 |
| GO:0035987 | endodermal cell differentiation                                       | 27/21092 | 0.04632734  | 0.244743578 | 0.208346372 | Col12a1 | 1 |
| GO:0050926 | regulation of positive chemotaxis                                     | 27/21092 | 0.04632734  | 0.244743578 | 0.208346372 | Ntrk3   | 1 |
| GO:0060536 | cartilage morphogenesis                                               | 27/21092 | 0.04632734  | 0.244743578 | 0.208346372 | Col12a1 | 1 |
| GO:1904467 | regulation of tumor necrosis factor secretion                         | 27/21092 | 0.04632734  | 0.244743578 | 0.208346372 | Lrrfp2  | 1 |
| GO:1990774 | tumor necrosis factor secretion                                       | 27/21092 | 0.04632734  | 0.244743578 | 0.208346372 | Lrrfp2  | 1 |
| GO:0051307 | meiotic chromosome separation                                         | 28/21092 | 0.048002435 | 0.244743578 | 0.208346372 | Mlh1    | 1 |
| GO:0042168 | heme metabolic process                                                | 29/21092 | 0.049674668 | 0.244743578 | 0.208346372 | Cyb5r4  | 1 |
| GO:0046039 | GTP metabolic process                                                 | 29/21092 | 0.049674668 | 0.244743578 | 0.208346372 | Rhoq    | 1 |
| GO:0050654 | chondroitin sulfate proteoglycan metabolic process                    | 29/21092 | 0.049674668 | 0.244743578 | 0.208346372 | Pxylp1  | 1 |
| GO:0098698 | postsynaptic specialization assembly                                  | 29/21092 | 0.049674668 | 0.244743578 | 0.208346372 | Ntrk3   | 1 |

|            |                            |           |             |             |             |              |   |
|------------|----------------------------|-----------|-------------|-------------|-------------|--------------|---|
| GO:0006302 | double-strand break repair | 204/21092 | 0.049694819 | 0.244743578 | 0.208346372 | Mlh1/Morf411 | 2 |
|------------|----------------------------|-----------|-------------|-------------|-------------|--------------|---|
